# Supplementary material
Source: publisher figshare collection journal article supplement (https://acs.figshare.com/ndownloader/files/26441472)
Supplement: Supplementary file 1 [file 26441472]

## **A Unique Molecular Interaction with Histone Deacetylase 6 Catalytic Tunnel: Crystallographic and Biological Characterization of a Model Chemotype**

Olasunkanmi O. Olaoye<sup>a,b</sup>, Paris R. Watson<sup>c</sup>, Nabanita Nawar<sup>a,b</sup>, Mulu Geletu<sup>a</sup>, Abootaleb Sedighi<sup>a</sup>, Shazreh Bukhari<sup>a,b</sup>, Yasir S. Raouf<sup>a,b</sup>, Pimyupa Manaswiyoungkul<sup>a,b</sup>, Fettah Erdogan<sup>a,b</sup>, Ayah Abdeldayem<sup>a,b</sup>, Aaron D. Cabral<sup>a,b</sup>, Muhammad Murtaza Hassan<sup>a,b</sup>, Krimo Toutah<sup>a</sup>, Andrew E. Shouksmith<sup>a</sup>, Justyna M. Gawel<sup>a</sup>, Johan Israelian<sup>a,b</sup>, Tudor B. Radu<sup>a,b</sup>, Niyati Kachhiyapatel<sup>a</sup>, Elvin D. de Araujo<sup>a</sup>, David W. Christianson<sup>c\*</sup>, Patrick T. Gunning<sup>a,b\*</sup>.

<sup>a</sup>Department of Chemical and Physical Sciences, University of Toronto Mississauga, 3359 Mississauga Rd N., Mississauga, Ontario L5L 1C6, Canada

<sup>b</sup>Department of Chemistry, University of Toronto, 80 St. George Street, Toronto, Ontario M5S 3H6, Canada

<sup>c</sup>Roy and Diana Vagelos Laboratories, Department of Chemistry, University of Pennsylvania, 231 South 34th Street, Philadelphia, PA 19104-6323, United States

### **Corresponding Authors**

\*Patrick T. Gunning, Department of Chemical and Physical Sciences, University of Toronto Mississauga, 3359 Mississauga Rd N., Mississauga, Ontario, Canada.  
Email: [patrick.gunning@utoronto.ca](mailto:patrick.gunning@utoronto.ca)

\*David W. Christianson, Roy and Diana Vagelos Laboratories, Department of Chemistry, University of Pennsylvania, 231 South 34th Street, Philadelphia, PA 19104-6323, United States. Email: [chris@sas.upenn.edu](mailto:chris@sas.upenn.edu)

## Table of Contents

|                                                                                                                                                                                                   |     |
|---------------------------------------------------------------------------------------------------------------------------------------------------------------------------------------------------|-----|
| <b>Fig S1A:</b> Docking pose of <b>1</b> in danio rerio HDAC6 catalytic domain 2, CD2 ( <i>dr</i> HDAC6, <b>PDB 5WGI</b> ) binding pocket. _____                                                  | S4  |
| <b>Fig. S1B:</b> Aerial view of hHDAC6 ( <b>PDB 5EDU</b> ) CD2 showing the L1 & L2 pockets and their relevant associated residues. _____                                                          | S4  |
| <b>Fig. S1C:</b> Approximate dimensions of the active site tunnel for HDAC3 ( <b>PDB: 4A69</b> ), HDAC6 ( <b>PDB: 5WGI</b> ), and HDAC8 ( <b>PDB: 1T64</b> ). _____                               | S5  |
| <b>Fig. S2:</b> Docking pose of <b>2</b> at the <i>dr</i> HDAC6 ( <b>PDB 5WGI</b> ) CD2. _____                                                                                                    | S5  |
| <b>Fig. S3:</b> Fluorescence Polarization (FP) assay. _____                                                                                                                                       | S6  |
| <b>Fig. S4-A:</b> An overlay of the docking pose of Citarinostat (with <i>dr</i> HDAC6 CD2, <b>PDB 5WGI</b> ) with a crystal image of ricolinostat with <i>dr</i> HDAC6 ( <b>PDB 5WGL</b> ) _____ | S6  |
| <b>Fig. S4-B:</b> Docking poses of TO-317 with <i>human</i> HDAC8, hHDAC8 ( <b>PDB 1T64</b> ). _____                                                                                              | S7  |
| <b>Table S1:</b> Comparison of in silico $\Delta G_B$ calculation of the binding of some selected inhibitors with HDAC6 & HDAC8 _____                                                             | S7  |
| <b>Fig. S5-A:</b> Kinetic analysis of TO-317/HDAC6 complex formation. _____                                                                                                                       | S8  |
| <b>Fig. S5-B:</b> Incubation IC <sub>50</sub> Studies for TO-317's Inhibition of full-length <i>human</i> HDAC6, hHDAC6. _____                                                                    | S8  |
| <b>Fig. S5-C:</b> Mass Spectrometry Data for TO-317 with HDAC6. _____                                                                                                                             | S9  |
| <b>Fig. S6:</b> Nuclear stain of HeLa cells treated with TO-317 and Citarinostat. _____                                                                                                           | S9  |
| <b>Fig. S7:</b> HeLa cells with TO-317 and Citarinostat at two doses for 6 h _____                                                                                                                | S10 |
| <b>Fig. S8-A:</b> Population sorting of MV4-11 cells at different concentrations of TO-317. _____                                                                                                 | S10 |
| <b>Fig. S8-B:</b> Population sorting of MV4-11 cells at different concentrations of Citarinostat. _____                                                                                           | S11 |
| <b>Fig. S9:</b> Kinetic solubility plots of TO-317 in phosphate buffer solution (PBS). _____                                                                                                      | S11 |
| <b>Table S2:</b> TO-317 permeability determination by Lipid-PAMPA method _____                                                                                                                    | S12 |
| <b>Table S3:</b> Cell viability assays in different cell lines _____                                                                                                                              | S12 |
| <b>Fig. S10</b> IC <sub>50</sub> Curves for HDAC inhibition determined by EMSA-based activity assays _____                                                                                        | S13 |
| <b>Supplementary Methods</b> _____                                                                                                                                                                | S16 |
| <b>Computational Modelling/Docking Studies</b> _____                                                                                                                                              | S16 |
| <b>Ligand Structure Preparation</b> _____                                                                                                                                                         | S16 |
| <b>Protein Structure Preparation</b> _____                                                                                                                                                        | S16 |
| <b>Fig. S11</b> Ramachandra plot outputs of HDAC6 and HDAC8 post protein-preparation _____                                                                                                        | S13 |
| <b>Receptor Grid Generation</b> _____                                                                                                                                                             | S16 |
| <b>Ligand Docking</b> _____                                                                                                                                                                       | S16 |
| <b>Table S4:</b> Ligand Interaction Diagrams _____                                                                                                                                                | S16 |
| <b>X-ray Experimental Procedure</b> _____                                                                                                                                                         | S17 |

|                                                                                         |            |
|-----------------------------------------------------------------------------------------|------------|
| <b>Table S5: Data Collection and Refinement Statistics for the HDAC6-TO-317 Complex</b> | <b>S16</b> |
| <b>In Vitro HDAC IC<sub>50</sub> Determination</b>                                      | <b>S19</b> |
| <b>Determination of Covalency Using Intact Mass Analysis</b>                            | <b>S19</b> |
| <b>Plasma Stability Study</b>                                                           | <b>S20</b> |
| <b>Whole Blood Stability</b>                                                            | <b>S20</b> |
| <b><i>In Vivo</i> PK Study</b>                                                          | <b>S21</b> |
| <b>Kinetic Solubility of lead compounds in PBS by HPLC</b>                              | <b>S22</b> |
| <b>PAMPA Assay</b>                                                                      | <b>S22</b> |
| <b>Product Characterization</b>                                                         | <b>S23</b> |
| <b>References</b>                                                                       | <b>S84</b> |

## Supplementary Information

**Fig S1A:** Docking pose of **1** in danio rerio HDAC6 catalytic domain 2, CD2 (*dr*HDAC6, **PDB 5WGI**) binding pocket. Full description of in silico experiments are detailed out below in supplementary methods under computational modelling/docking studies.

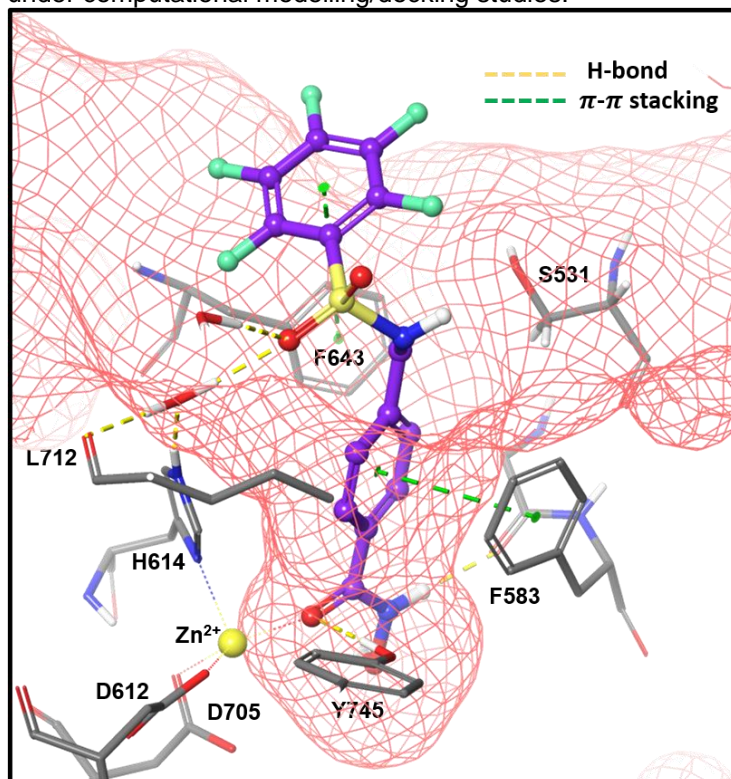

**Fig. S1B:** Aerial view of hHDAC6 (PDB 5EDU) CD2 showing the L1 & L2 pockets and their relevant associated residues.

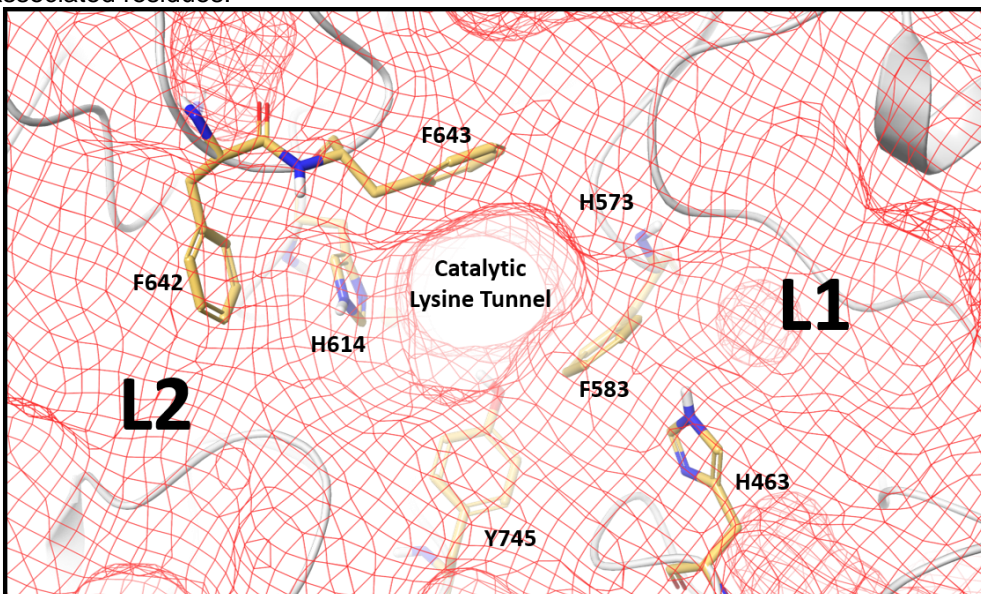



**Fig. S1C:** Approximate dimensions of the active site tunnel for HDAC3 (PDB: **4A69**), HDAC6 (PDB: **5WGI**), and HDAC8 (PDB: **1T64**). Approximate dimensions were determined using the built-in distance calculator on the Schrödinger Maestro 12.2.012 software

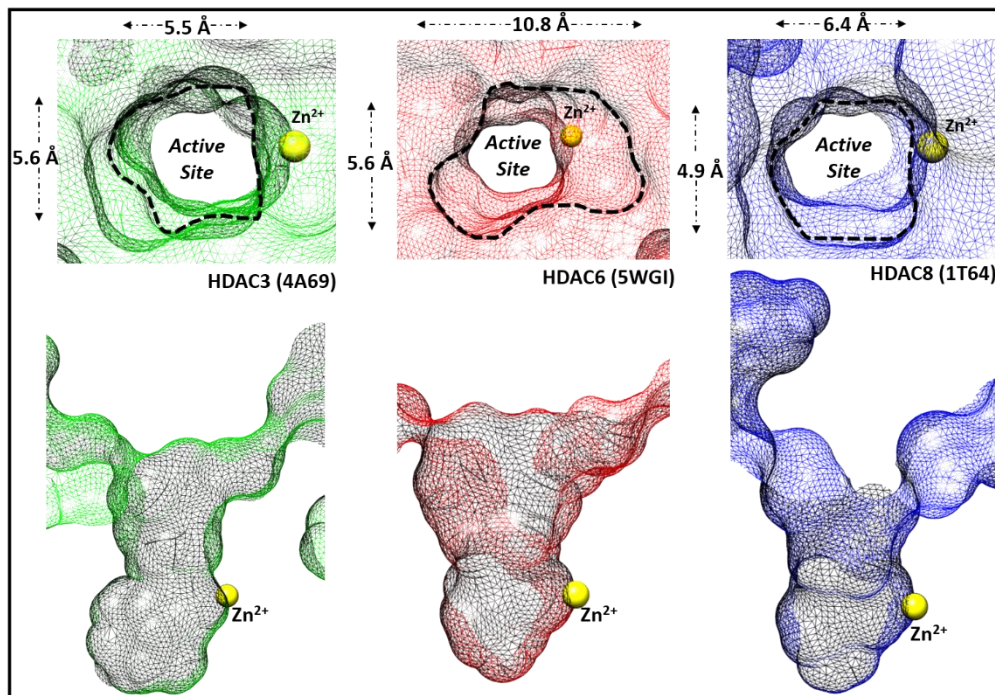

**Fig. S2:** Docking pose of **2** at the *d*HDAC6 (PDB **5WGI**) CD2. The aromatic substitution seems to capture more interactions at the catalytic surface, mainly pi-pi aromatic interactions with F643

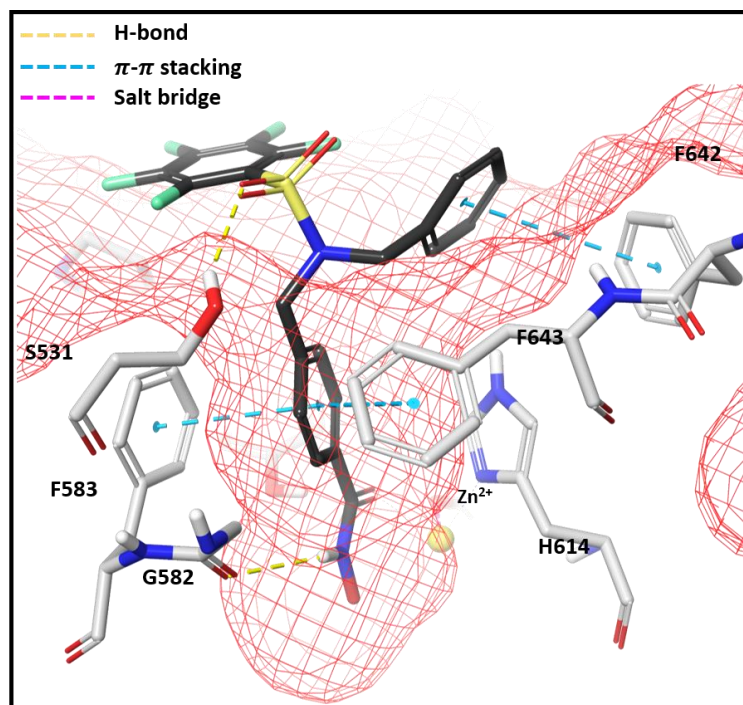

**Fig. S3:** Fluorescence Polarization (FP) assay shows superior potency of TO-317 in the library of compounds evaluated against HDAC6 and corroborates initial EMSA IC<sub>50</sub> data presented in main article.

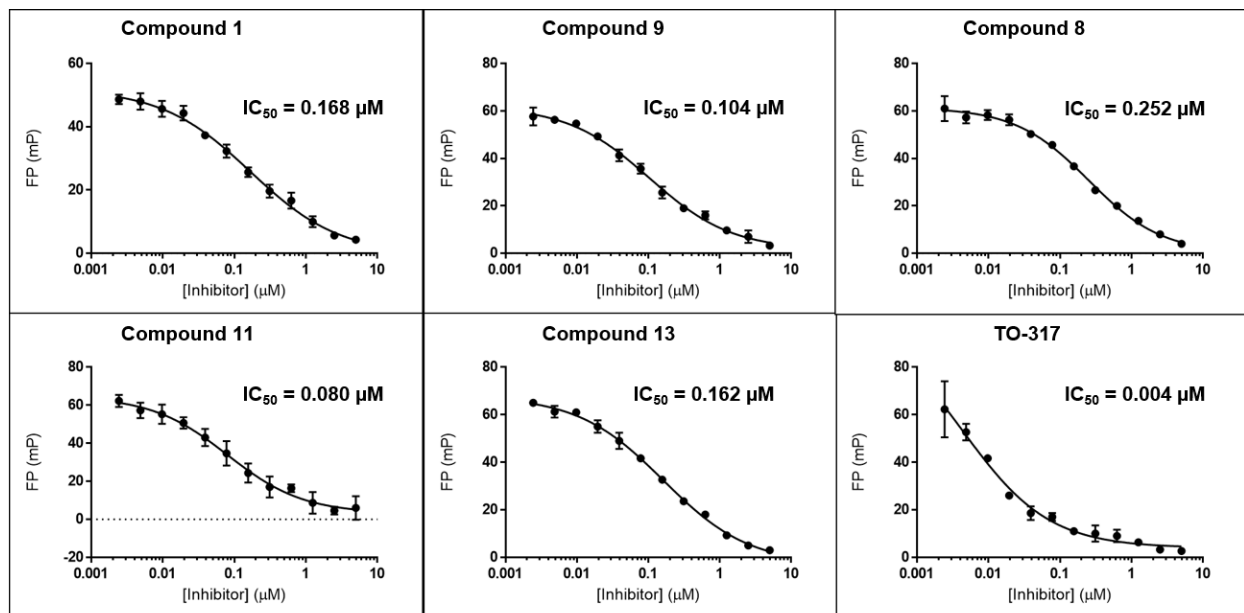

**Fig. S4-A:** An overlay of the docking pose of Citarinostat (with *dr*HDAC6 CD2, PDB 5WGI) with a crystal image of ricolinostat with *dr*HDAC6 (PDB 5WGL)

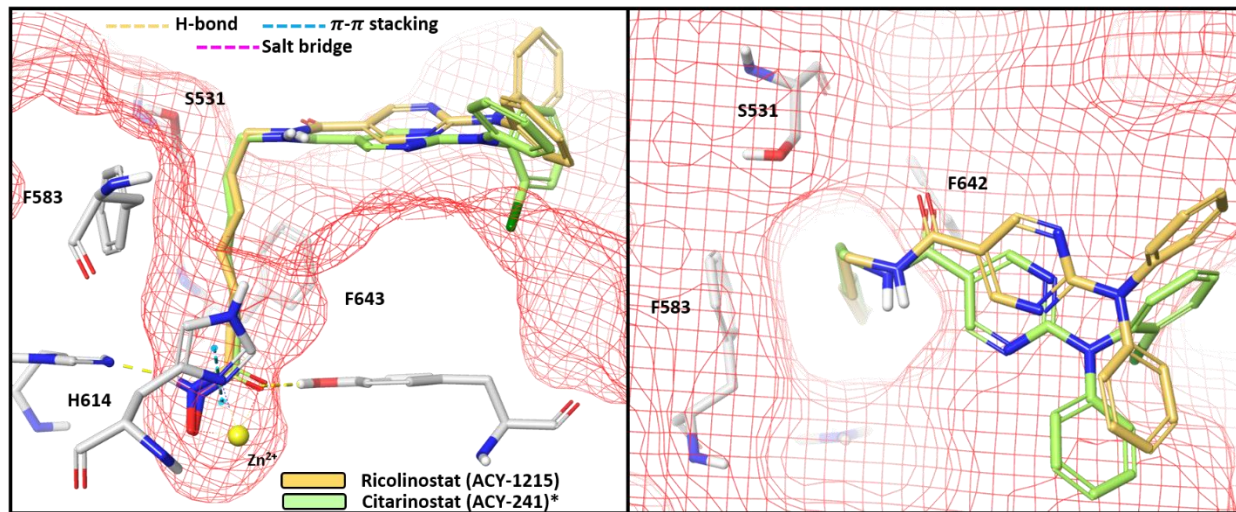

**Fig. S4-B:** Docking poses of TO-317 with *human* HDAC8, *h*HDAC8 (PDB 1T64). Deck A shows binding pocket view with minimal residue engagements at the catalytic tunnel, deck B shows aerial view revealing a solvent exposed pyridyl motif, unlike within the drHDAC6 pocket where notable hydrogen bonding interactions with the Zn<sup>2+</sup>-ligand, H614, were observed

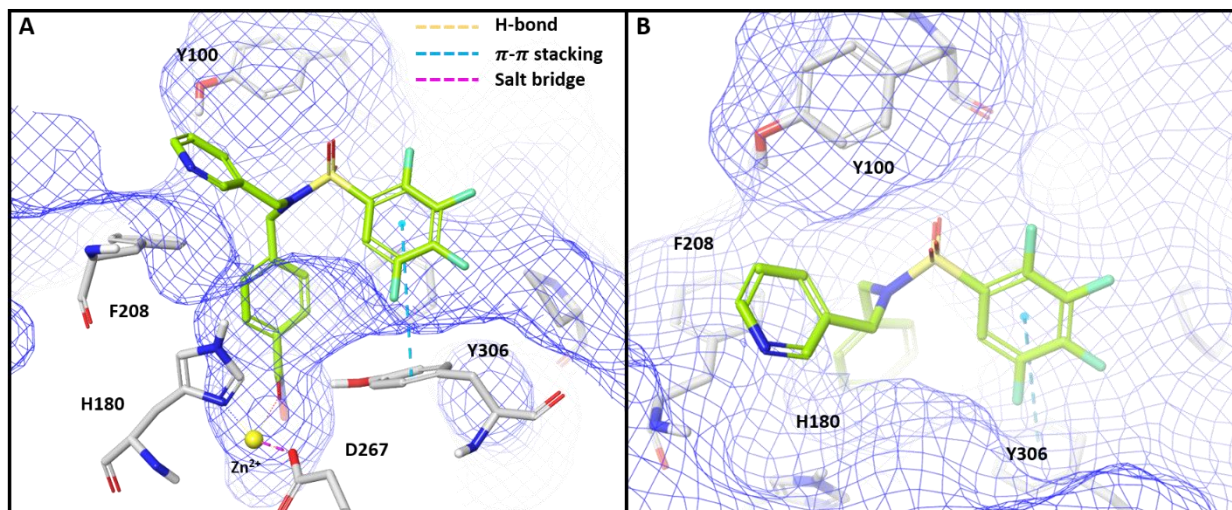

**Table S1:** Comparison of *in silico*  $\Delta G_B$  calculation of the binding of some selected inhibitors with HDAC6 & HDAC8

| <i>In silico</i> ΔG <sub>B</sub> (kcal/mol) |        |
|---------------------------------------------|--------|
| Compound                                    | HDAC6  |
| Citarinostat                                | -7.939 |
| <b>A</b>                                    | -8.843 |
| <b>1</b>                                    | -8.464 |
| TO-317                                      | -9.065 |

| <i>In silico</i> ΔG <sub>B</sub> (kcal/mol) |        |        |
|---------------------------------------------|--------|--------|
| Compound                                    | HDAC6  | HDAC8  |
| TO-317                                      | -9.065 | -7.565 |

**Fig. S5-A:** Kinetic analysis of TO-317/HDAC6 complex formation. A two-step reversible model was employed based on a jump-dilution kinetic assay. Full details on experimental procedures are provided below in supplementary methods under in vitro HDAC IC<sub>50</sub> determination.

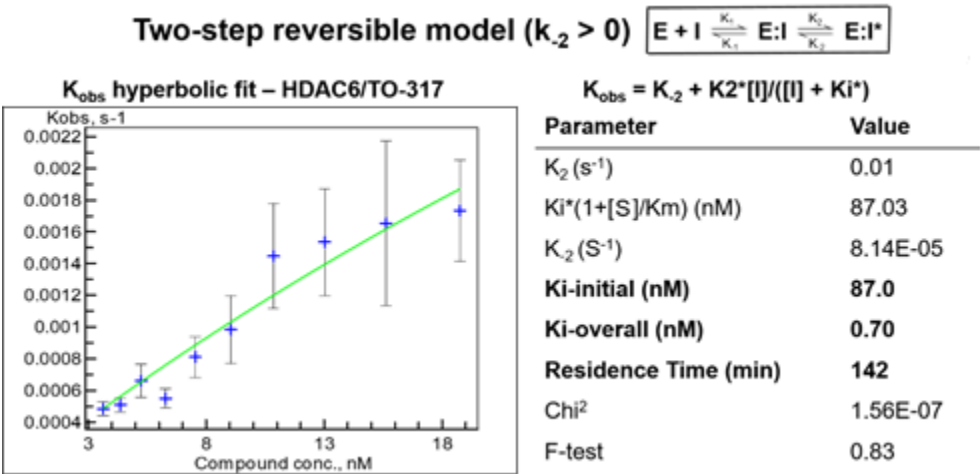

**Fig. S5-B:** Incubation IC<sub>50</sub> Studies for TO-317’s Inhibition of full-length *human* HDAC6, *h*HDAC6.

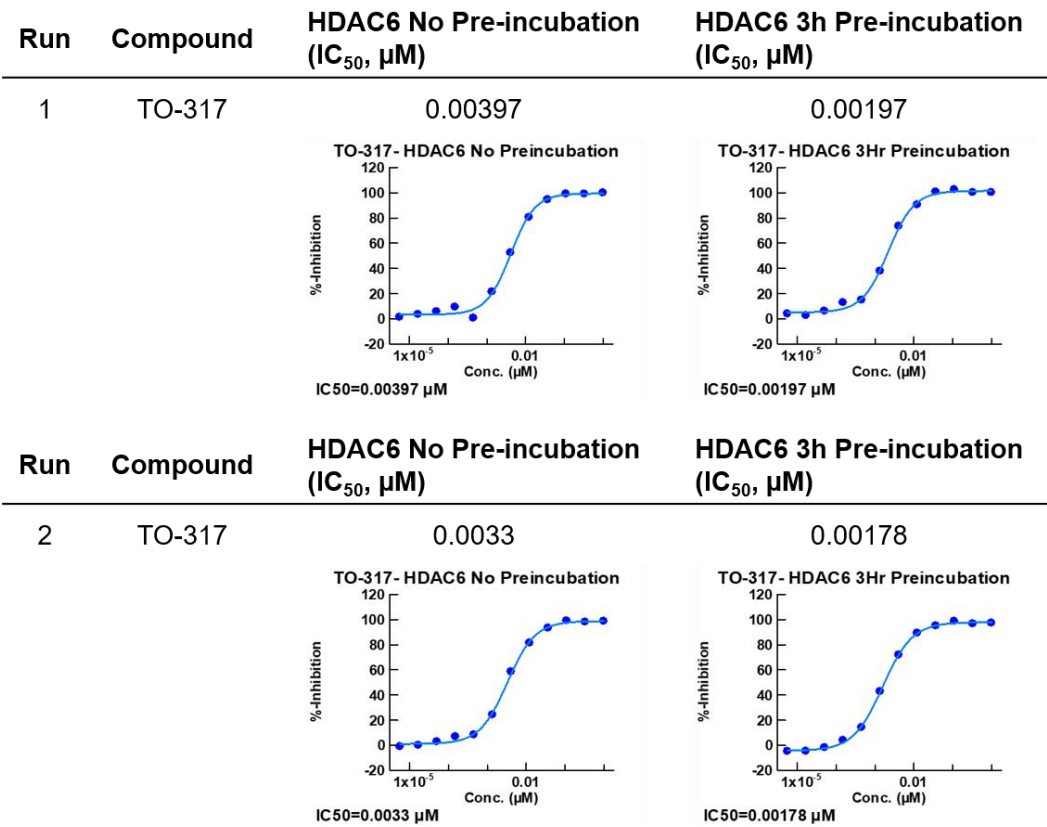



**Fig. S5-C:** Mass Spectrometry Data for TO-317 with HDAC6

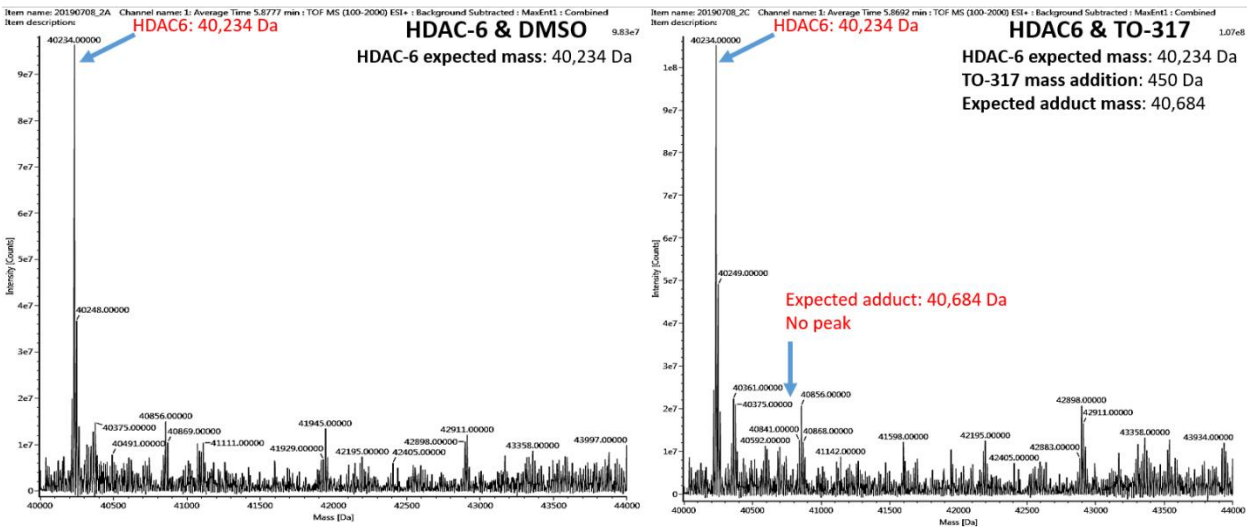

**Fig. S6:** Nuclear stain of HeLa cells treated with TO-317 and Citarinostat shown in blue. Overlay of both Ac- $\alpha$ -tubulin stain (red)/nuclear stain and Ac- $\alpha$ -tubulin stain/Ac-H3K27 histones are shown.

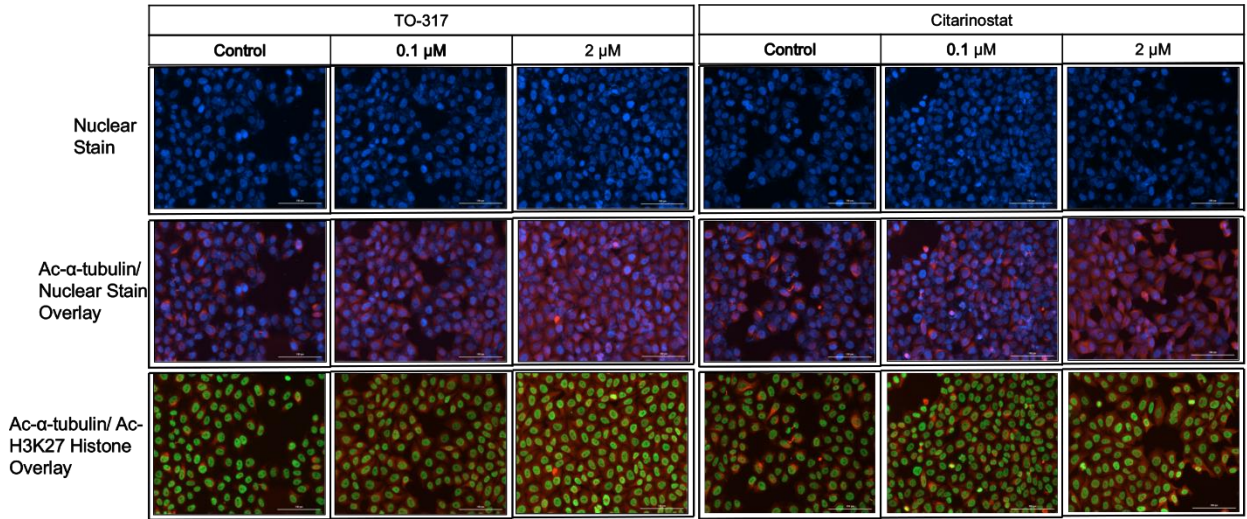

**Fig. S7:** HeLa cells with TO-317 and Citarinostat at two doses for 6 h. Red – acetylated  $\alpha$ -tubulin; Green – acetylated histones. Fluorescence imaging shows TO-317 treated HeLa cells leads to drastic accumulation of acetylated  $\alpha$ -tubulin at 2  $\mu\text{M}$  without significant accumulation of acetylated histones. Images from Citarinostat stain shows modest build-up of  $\alpha$ -tubulin at 2  $\mu\text{M}$ , which is of less intensity compared to TO-317 at the same concentration.

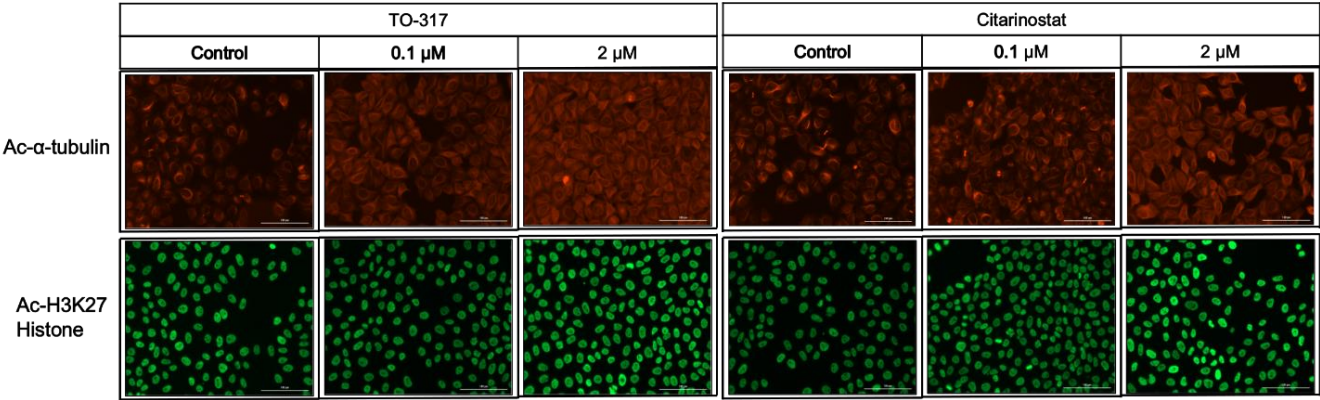

**Fig. S8-A:** Population sorting of MV4-11 cells at different concentrations of TO-317. A dose-dependent increase in apoptotic cells were observed when TO-317 was incubated with MV4-11 cells for 6 h revealing a mechanistic approach to the anti-proliferative activity of TO-317 in several cancer cells.

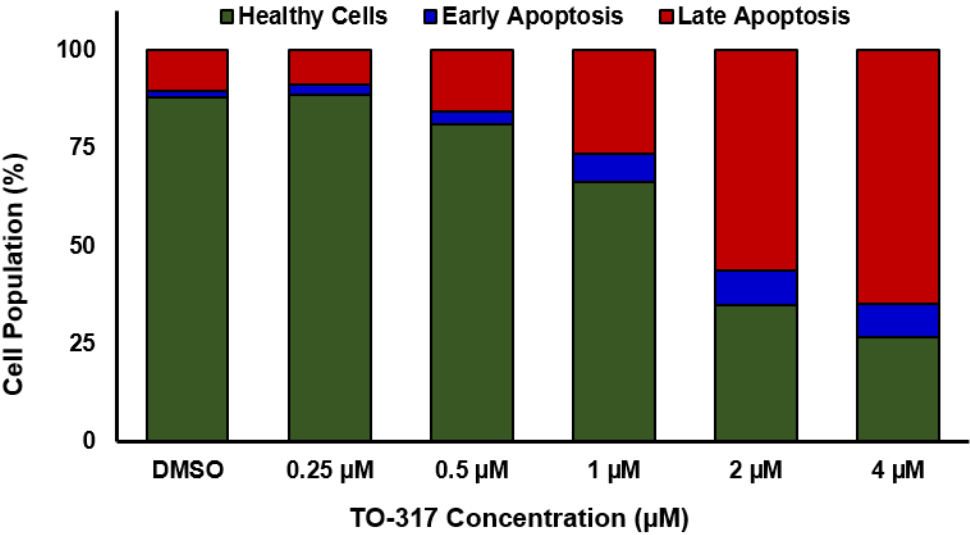

**Fig. S8-B:** Population sorting of MV4-11 cells at different concentrations of Citarinostat. Although a similar dose-dependent increase in apoptotic cells were observed when Citarinostat was incubated with MV4-11 cells for 6 hrs, it shows weaker potency when compared to TO-317.

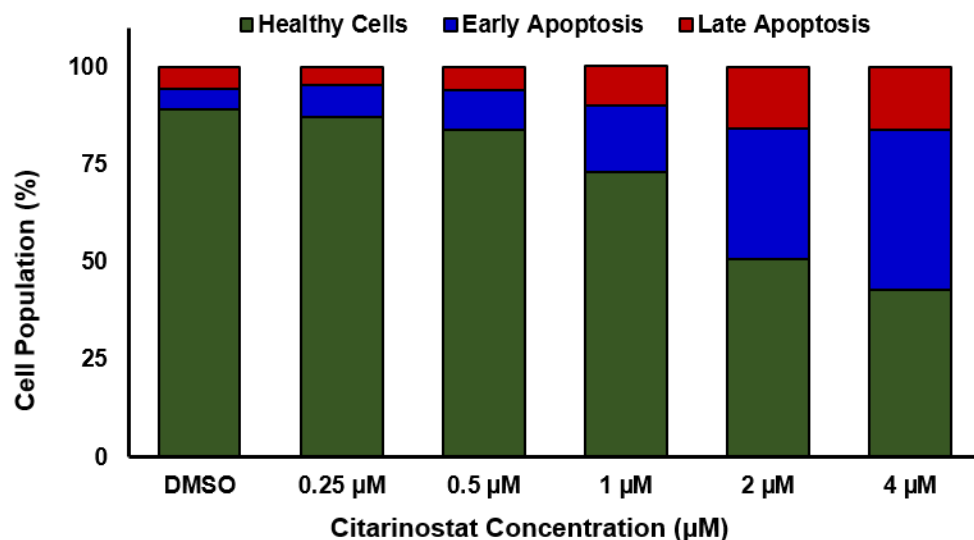

**Fig. S9:** Kinetic solubility plots of TO-317 in phosphate buffer solution (PBS) at pH7.4, 5% DMSO. HPLC quantification was used after filtration at each concentration studied.

- TO-317

- Saturation concentration (PBS pH 7.4, 5% DMSO):

- $161.50 \pm 33.20 \mu\text{M}$  (n = 3)
- $142.35 \pm 2.40 \mu\text{M}$  (n = 2)

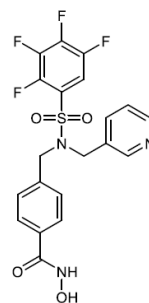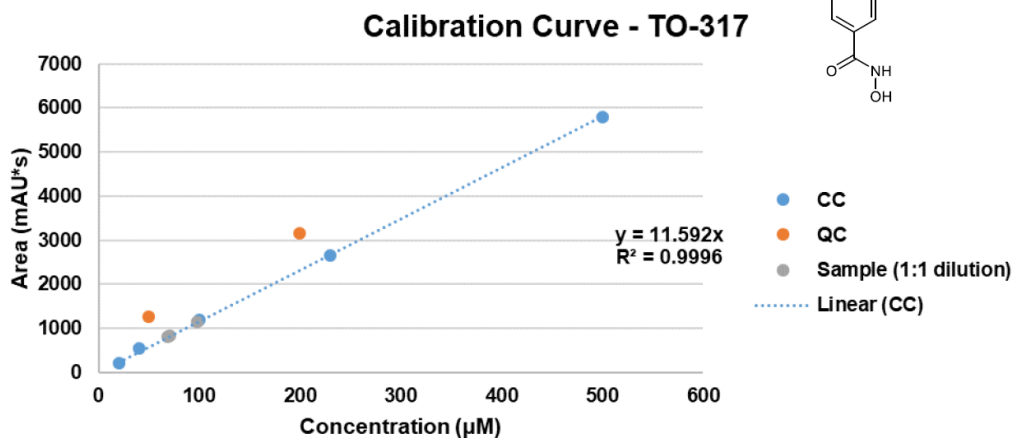



**Table S2:** TO-317 permeability determination by Lipid-PAMPA method

| Compound | Replicate 1 | Replicate 2 | Replicate 3 | Average Score | % Recovery |
|----------|-------------|-------------|-------------|---------------|------------|
| TO-317   | 6.53        | 6.96        | 6.61        | 6.71          | 111.5%     |

Scores are reported as  $-\log P_e$  scores. The compounds can be categorized into high and low permeability. Compounds which have a  $-\log P_e < 6$  are classified as high permeability and compounds with a  $-\log P_e > 6$  are classified as low permeability.

**Table S3:** Cell viability assays in different cell lines

| Cell Lines | TO-317<br>IC <sub>50</sub> (μM) | Citarinostat<br>IC <sub>50</sub> (μM) |
|------------|---------------------------------|---------------------------------------|
| RPMI8226   | 0.7 (±0.06)                     | 6.5 (±0.22)                           |
| MM.1S      | 0.7 (±0.06)                     | 1.6 (±0.16)                           |
| U87G       | 2.0 (±0.15)                     | 9.1 (NA)                              |
| MOLM-13    | 2.0 (±0.21)                     | 13.5 (±1.66)                          |
| MV4-11     | 0.6 (±0.07)                     | 1.2 (±0.47)                           |
| Jurkat     | 1.9 (±0.11)                     | 1.2 (±0.16)                           |
| AML3       | 3.3 (±0.41)                     | 7.7 (±1.59)                           |
| AR230      | 1.5 (NA)                        | 4.3 (±2.02)                           |
| BV-173     | 1.7 (±0.19)                     | 0.9 (±0.13)                           |
| Ramos      | 0.3 (±0.06)                     | ND                                    |
| HeLa       | 3.5 (±1.43)                     | 7.0 (±2.06)                           |
| MRC-9      | >50                             | 30.4 (±7.95)                          |

95% confidence interval are reported in brackets after each IC<sub>50</sub>

NA – Not applicable, 95% confidence interval too wide

ND – Not determined

**Fig. S10** IC<sub>50</sub> Curves for HDAC inhibition determined by EMSA-based activity assays

**Compound 2 IC<sub>50</sub> Curves**

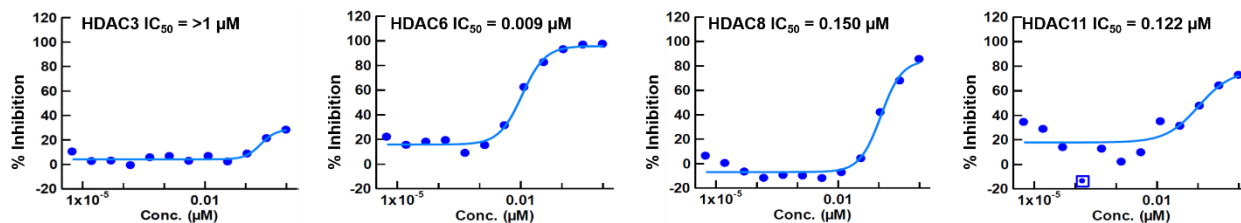

**Compound 3 IC<sub>50</sub> Curves**

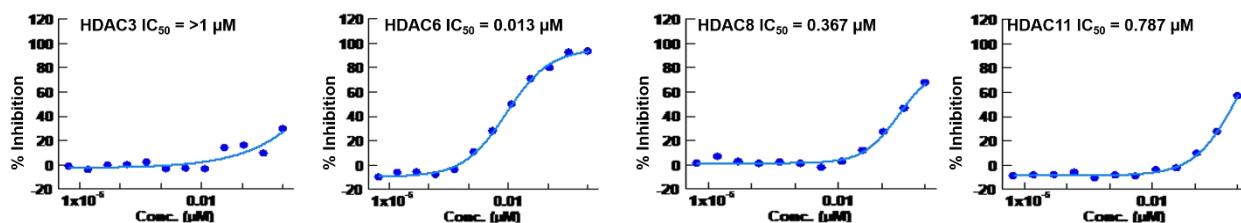

**Compound 4 IC<sub>50</sub> Curves**

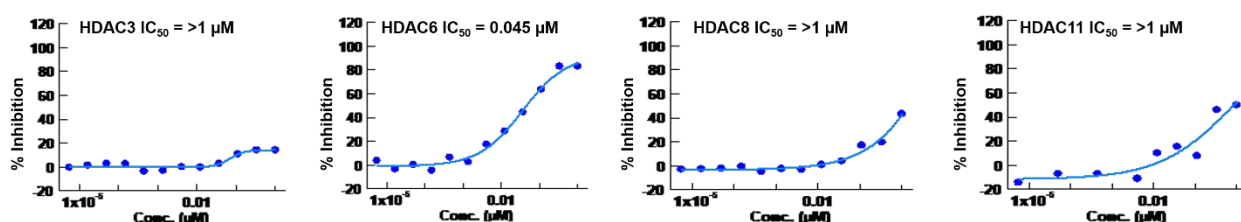

**Compound 5 IC<sub>50</sub> Curves**

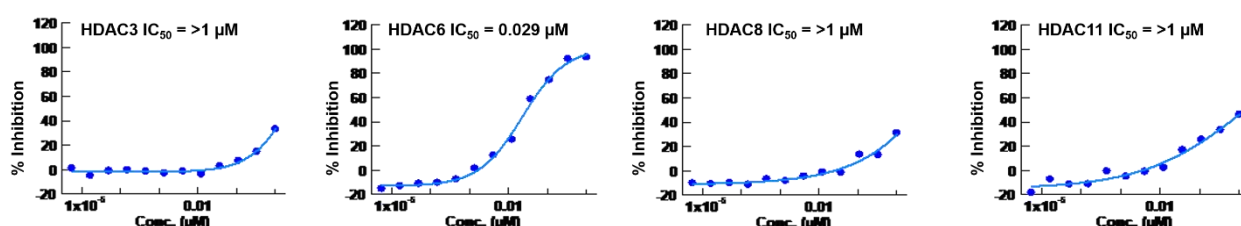

**Compound 6 IC<sub>50</sub> Curves**

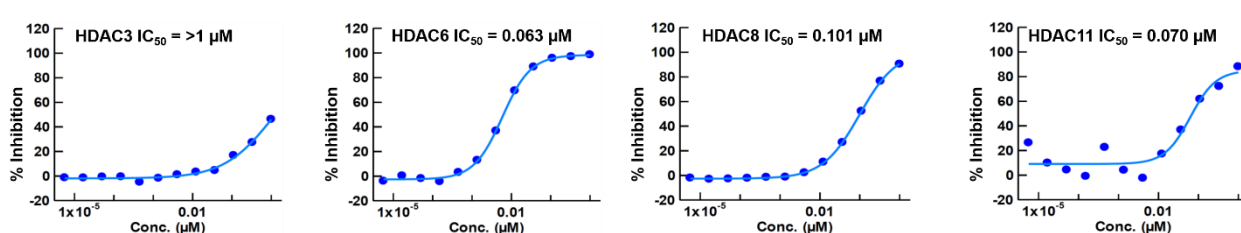

### Compound 7 IC<sub>50</sub> Curves

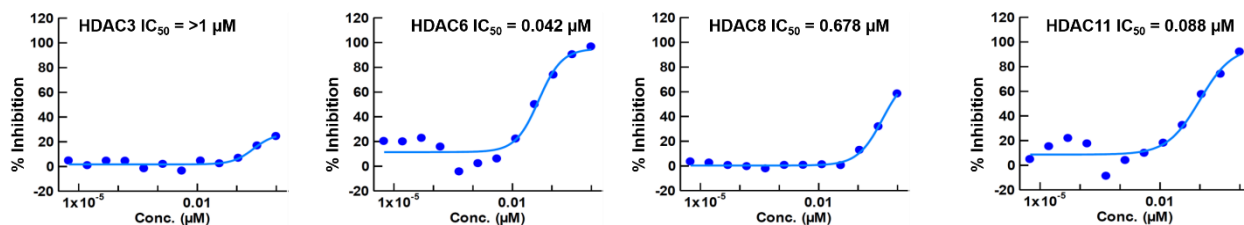

### Compound 8 IC<sub>50</sub> Curves

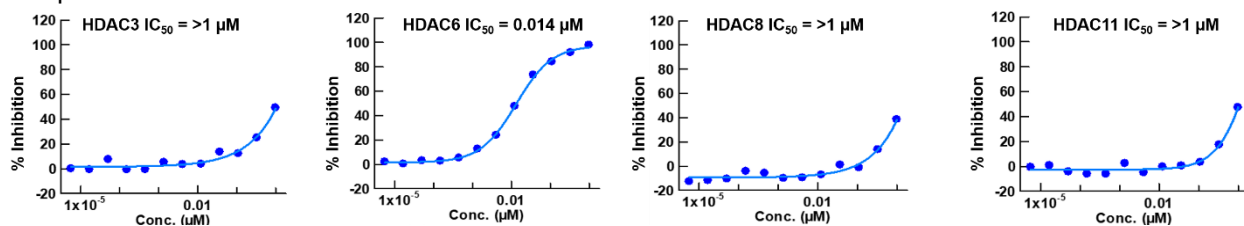

### Compound 9 IC<sub>50</sub> Curves

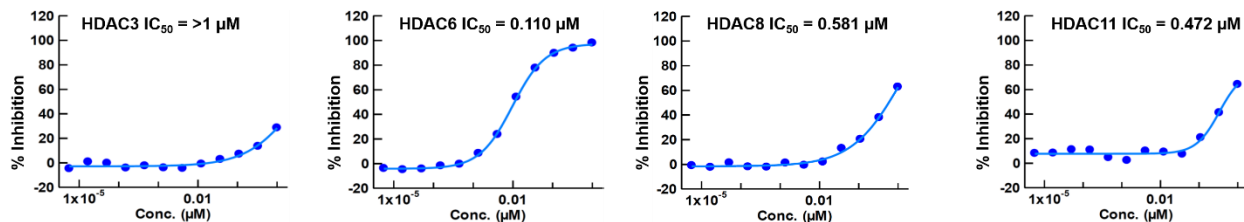

### Compound 10 IC<sub>50</sub> Curves

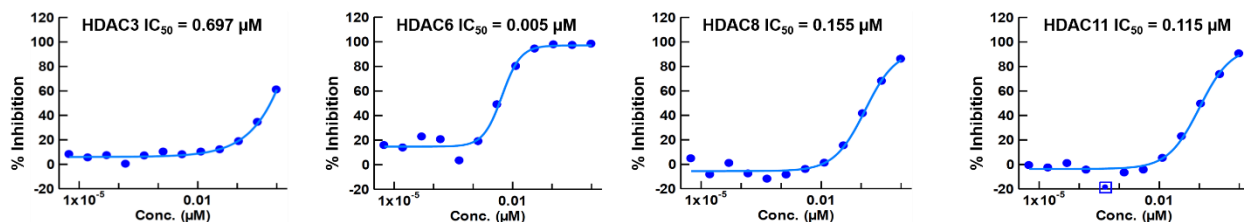

### Compound 11 IC<sub>50</sub> Curves

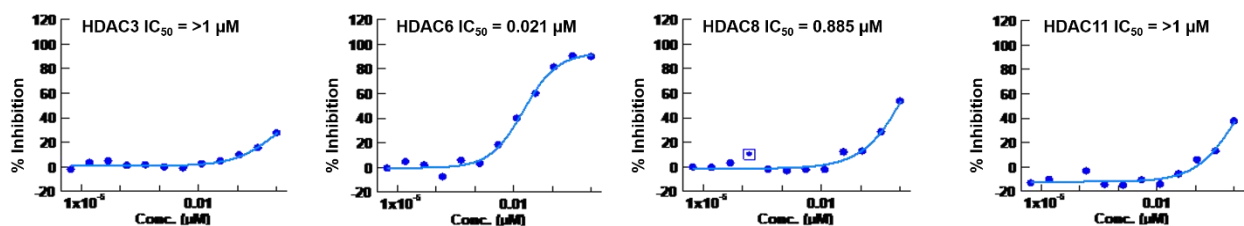

### Compound **12** IC<sub>50</sub> Curves

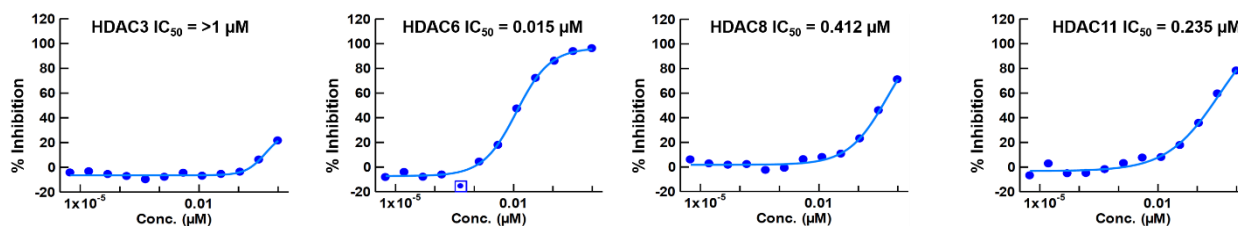

### Compound **13** IC<sub>50</sub> Curves

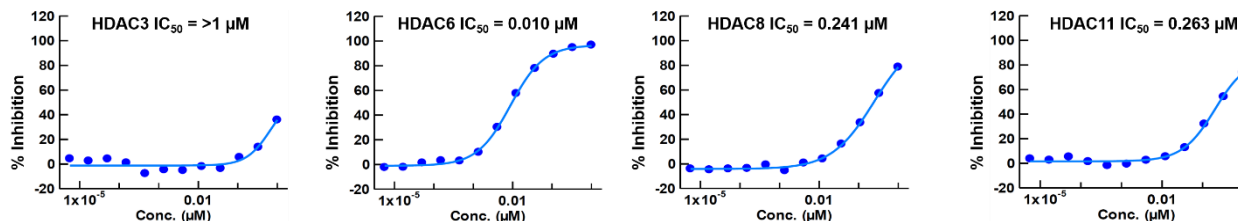

### Compound **14** IC<sub>50</sub> Curves

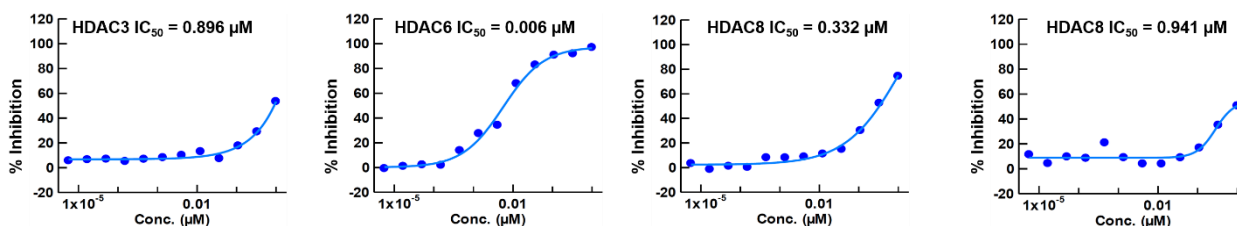

### Compound **15 (TO-317)** IC<sub>50</sub> Curves

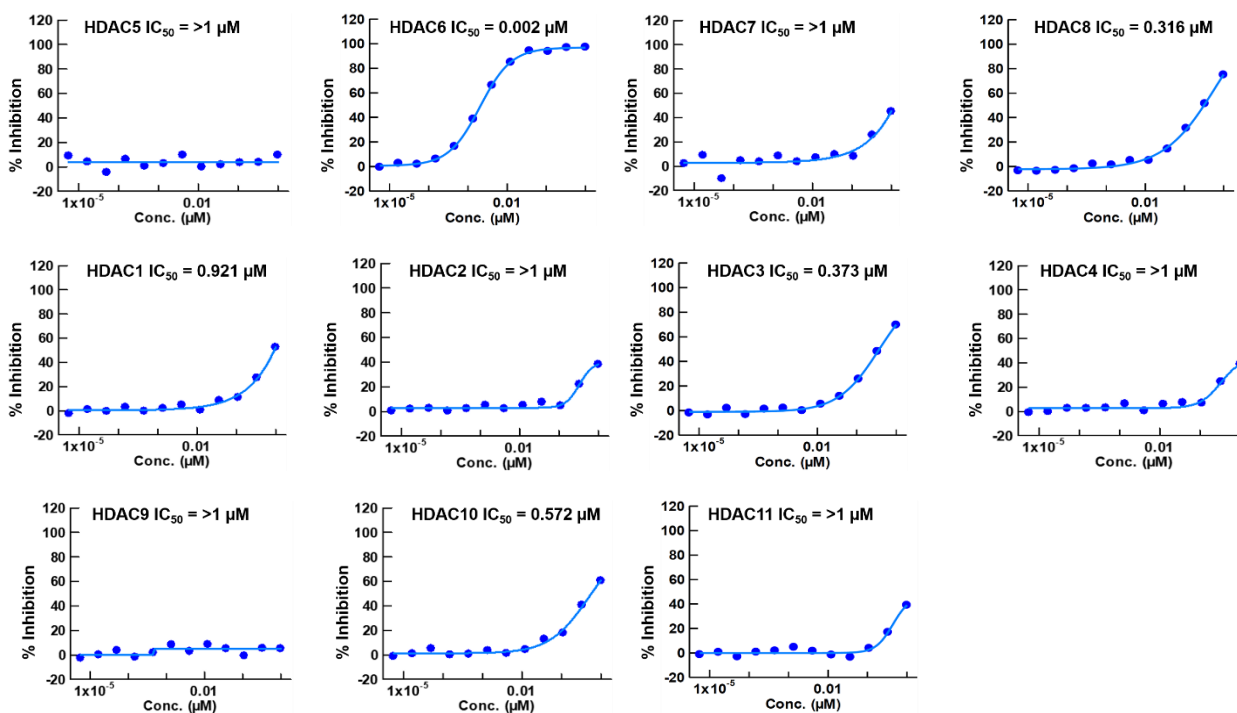

## Supplementary Methods

### Computational Modelling/Docking Studies

All described *in silico* experiments were performed on the Schrödinger Maestro 12.2.012 software using Glide within the Small-Molecule Drug Discovery Suite 2019-1 (Schrödinger, LLC, New York, NY, 2019).<sup>1-3</sup> These studies required the following programs within the above suite: Epik, Optimized Potentials for Liquid Simulations 3e (OPLS3e) force-field, Glide, LigPrep and the Protein Preparation Wizard. Other software used include ChemDraw Professional 17.1. All ligand poses and protein structure images were generated with Maestro 12.2.012.

### Ligand Structure Preparation

The chemical structure of the HDACi were manually drawn into Maestro 12.2.012 using the 2D sketcher functionality, before undergoing a ligand preparation workflow (LigPrep, Schrödinger, LLC, New York, NY, 2019) using the OPLS3e force-field. This involved ionization using Epik to generate possible protonation states at target pH  $7.0 \pm 2.0$ , desalting (if applicable) and generating tautomers (if applicable). The compound was then energetically minimized, and the resulting 3-dimensional structure used to specify chiral centers (if applicable).

### Protein Structure Preparation

The relevant X-ray structures of HDAC6 catalytic domain 2 (PDB 5EDU, 5WGI, 5WGL) and HDAC8 in (PDB 1T64) were retrieved from the protein data bank (<https://www.rcsb.org>) into Maestro 12.2.012 before undergoing a protein preparation workflow (Protein Preparation Wizard, Prime, Schrödinger, LLC, New

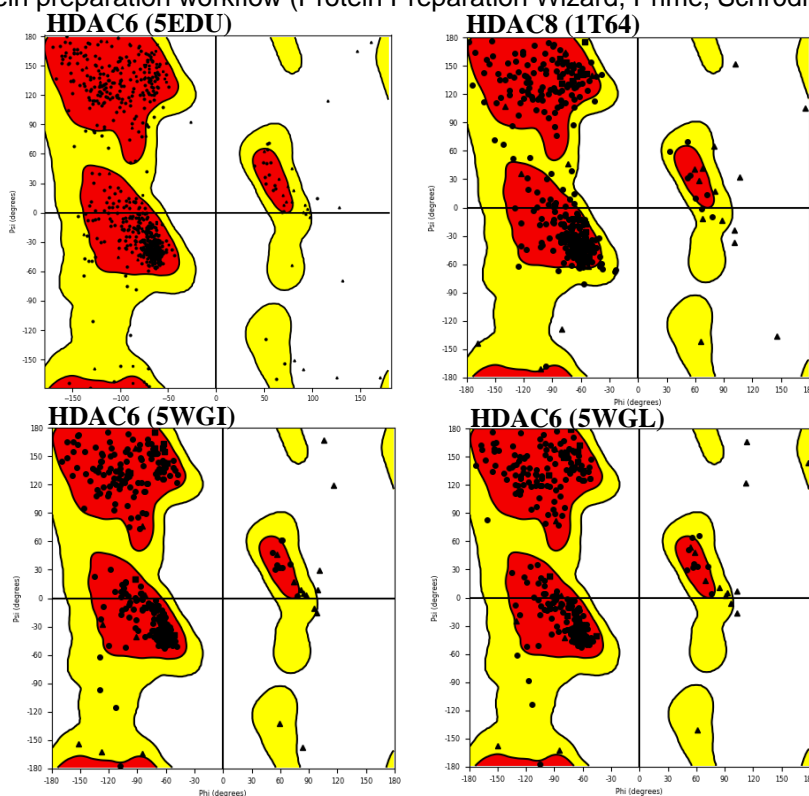

**Fig. S11** Ramachandran plot outputs of HDAC6 and HDAC8 post protein-preparation. As expected, due to their structural flexibility, only Gly and Ala residues were found to occupy the disfavoured region (quadrant IV, bottom right). No other sterically forbidden angles were observed in other residues of either protein structures.

York, 2019). This procedure involved assigning appropriate bond orders, adding hydrogens, creating zero-order bonds to metal centers and the formation of disulfide bonds (where appropriate). Missing loops and residue side-chains were added using BLAST homology searches and Prime, water molecules farther than 5.0 Å from heteroatoms were deleted and, similar to the ligand preparation workflow, Epik was used to generate relevant residue ionizations at target pH  $7.0 \pm 2.0$ . All residues with reported steric clashes were individually minimized (OPLS3e). Finally, water molecules with less than 3 H-bonds to non-water molecules were removed. Using Maestro 12.2.012, Ramachandran plot analysis was used to analyze the protein structure output, ensuring successful preparation prior to *in silico* docking studies.

## Receptor Grid Generation

In order to define an appropriate receptor-grid for the molecules under study, the Induced-Fit Docking (IFD) workflow by Maestro was utilized against HDAC6 (**Schrödinger Release 2019-2**: Schrödinger Suite 2019-2 Induced Fit Docking protocol; Glide, Schrödinger, LLC, New York, NY, 2016; Prime, Schrödinger, LLC, New York, NY, 2019). Using the standard protocol, with the OPLS3e FF, the grid was defined surrounding the co-crystallized ligands within the lysine tunnel (catalytic active site) of the relevant PDB for HDAC 6 and 8. This was followed by trimming neighbouring side chains (Receptor Van der Waals scaling 0.70), whilst refining residues within 5 Å of the docked ligand poses via a standard precision (SP) workflow. A metal co-ordination constraint was also applied (rewarding ligands which co-ordinate  $\text{Zn}^{2+}$ ).

## Ligand Docking

The relevant HDACi were screened against HDAC6 and HDAC8 using IFD protocols and the top binding poses as a function of docking score (kcal/mol) were generated and analyzed. In all docking calculations, ligands were flexible, and the protein remained static (excluding rotatable groups and the generated IFD models). The ligands were allowed to sample nitrogen inversions and ring conformations, while non-planar amide conformations were penalized, and intra-molecular hydrogen bonds were rewarded. After post-docking minimizations, the top binding pose for each ligand was produced and analyzed for key interactions using Maestro 12.2.012 and Ligand Interaction Diagrams. Raw data for the lead compound docking studies can be seen below.

**Table S4:** Ligand Interaction Diagrams.

| Protein | Title        | State Penalty | Force Field | docking score | glide gscore | glide lipo   | glide hbond     | glide metal   | glide rewards | glide evdw              |
|---------|--------------|---------------|-------------|---------------|--------------|--------------|-----------------|---------------|---------------|-------------------------|
| HDAC6   | TO-317       | 2.5805        | OPLS3e      | -9.065        | -9.584       | -2.293       | -0.578          | -2.3          | -0.399        | -34.585                 |
| HDAC6   | TO-130       | 2.5731        | OPLS3e      | -8.464        | -8.507       | -2.784       | -0.32           | -2.3          | 0.231         | -31.251                 |
| HDAC6   | Citarinostat | 3.0499        | OPLS3e      | -7.939        | -8.397       | -1.375       | -0.566          | -2.3          | -0.45         | -31.462                 |
| HDAC8   | TO-317       | 2.5805        | OPLS3e      | -7.565        | -10.146      | -2.489       | -0.608          | -2.3          | -0.574        | -38.912                 |
| Protein | Title        | glide ecoul   | glide erotb | glide esite   | glide emodel | glide energy | glide einternal | glide confnum | glide posenum | glide eff state penalty |
| HDAC6   | TO-317       | -16.84        | 0.46        | -0.219        | -90.259      | -51.425      | 10.741          | 125           | 313           | 0.519                   |
| HDAC6   | TO-130       | -13.276       | 0.431       | -0.212        | -74.203      | -44.527      | 7.877           | 90            | 58            | 0.043                   |
| HDAC6   | Citarinostat | -20.284       | 1.111       | -0.2          | -103.17      | -51.746      | 7.383           | 879           | 177           | 0.458                   |
| HDAC8   | TO-317       | -16.485       | 0.46        | -0.217        | -98.324      | -55.397      | 9.734           | 107           | 206           | 2.58                    |

## X-ray Experimental Procedure

HDAC6 from *Danio rerio* (zebrafish; catalytic domain 2, henceforth abbreviated simply “HDAC6”) was expressed in *Escherichia coli* and purified as described.<sup>4</sup> The HDAC6–TO-317 complex was co-crystallized using the sitting drop vapor diffusion method at 4 °C by equilibrating a 200 nL drop containing 100 nL of protein solution [10 mg/mL HDAC6, 50 mM 4-(2-hydroxyethyl)-1-piperazineethanesulfonic acid (HEPES) (pH 7.5), 100 mM KCl, 5% glycerol (v/v), 1 mM tris(2-carboxyethyl)phosphine (TCEP), and 2 mM TO-317] and 100 nL of precipitant solution [0.2 M potassium formate and 20% polyethylene glycol (PEG) 3350 (w/v)] against an 80 µL reservoir of precipitant solution. Crystals appeared within 4 days. Crystals were soaked in mother liquor augmented with 30% ethylene glycol prior to harvesting and flash cooling in liquid nitrogen.

X-ray diffraction data were collected at the Highly Automated Macromolecular Crystallography (AMX) beamline 17-ID-1 at the National Synchrotron Light Source II, Brookhaven National Laboratory

(Upton, NY). Crystals of the HDAC6–TO-317 complex diffracted X-rays to 1.84 Å resolution. Diffraction data were indexed and integrated using iMosflm<sup>5</sup> and scaled using Aimless<sup>6</sup> in the CCP4 program suite.<sup>7</sup> The crystal structure was solved using molecular replacement as implemented in Phaser;<sup>8</sup> the atomic coordinates of unliganded HDAC6 (PDB 5EEM)<sup>9</sup> were used as a search model. The program Phenix<sup>10</sup> was used for crystallographic refinement and the graphics program Coot<sup>11</sup> was used to build and manipulate the atomic model of the HDAC6–TO-317 complex. Solvent molecules and the atomic coordinates of TO-317 were built into well-defined electron density during the later stages of refinement. The final model was evaluated using MolProbity.<sup>12</sup> Data collection and refinement statistics are recorded in Table S5.

**Table S5.** Data Collection and Refinement Statistics for the HDAC6–TO-317 Complex<sup>a</sup>

|                                                   |                                                       |
|---------------------------------------------------|-------------------------------------------------------|
| Space group                                       | <i>P</i> 2 <sub>1</sub> 2 <sub>1</sub> 2 <sub>1</sub> |
| a,b,c (Å)                                         | 75.50, 96.45, 98.45                                   |
| α, β, γ (°)                                       | 90.00, 90.00, 90.00                                   |
| R <sub>merge</sub> <sup>b</sup>                   | 0.128 (0.391)                                         |
| R <sub>pim</sub> <sup>c</sup>                     | 0.083 (0.269)                                         |
| CC <sub>1/2</sub> <sup>d</sup>                    | 0.994 (0.956)                                         |
| Redundancy                                        | 6.3 (5.8)                                             |
| Completeness (%)                                  | 99.3 (98.6)                                           |
| I/σ                                               | 9.0 (4.4)                                             |
| Refinement                                        |                                                       |
| Resolution (Å)                                    | 59.43–1.84<br>(1.90–1.84)                             |
| No. reflections                                   | 122423 (11945)                                        |
| R <sub>work</sub> /R <sub>free</sub> <sup>e</sup> | 0.168/0.207<br>(0.187/0.246)                          |
| Number of Atoms <sup>f</sup>                      |                                                       |
| Protein                                           | 5486                                                  |
| Ligand                                            | 95                                                    |
| Solvent                                           | 381                                                   |
| Average B factors (Å <sup>2</sup> )               |                                                       |
| Protein                                           | 11                                                    |
| Ligand                                            | 18                                                    |
| Solvent                                           | 18                                                    |
| RMS Deviations                                    |                                                       |
| Bond lengths (Å)                                  | 0.007                                                 |
| Bond angles (°)                                   | 1.2                                                   |
| Ramachandran Plot                                 |                                                       |
| Favored                                           | 97.00                                                 |
| Allowed                                           | 3.00                                                  |
| Outliers                                          | 0.00                                                  |

<sup>a</sup>Values in parentheses refer to the highest-resolution shell indicated. <sup>b</sup> $R_{\text{merge}} = \sum_{hkl} \sum_i |I_{i,hkl} - \langle I \rangle_{hkl}| / \sum_{hkl} \sum_i I_{i,hkl}$ , where  $\langle I \rangle_{hkl}$  is the average intensity calculated for reflection  $hkl$  from replicate measurements. <sup>c</sup> $R_{\text{p.i.m.}} = (\sum_{hkl} (1/(N-1)))^{1/2} \sum_i |I_{i,hkl} - \langle I \rangle_{hkl}| / \sum_{hkl} \sum_i I_{i,hkl}$ , where  $\langle I \rangle_{hkl}$  is the average intensity calculated for reflection  $hkl$  from replicate measurements and  $N$  is the number of reflections. <sup>d</sup>Pearson correlation coefficient between random half-datasets. <sup>e</sup> $R_{\text{work}} = \sum ||F_o| - |F_c|| / \sum |F_o|$  for reflections contained in the working set.  $|F_o|$  and  $|F_c|$  are the observed and calculated structure factor amplitudes, respectively.  $R_{\text{free}}$  is calculated using the same expression for reflections contained in the test set held aside during refinement. <sup>f</sup>Per asymmetric unit. <sup>g</sup>Calculated with MolProbity.



### In Vitro HDAC IC<sub>50</sub> Determination

The in vitro HDAC IC<sub>50</sub> determination was carried out by Nanosyn Inc., Santa Clara, CA and the details has been reported elsewhere.<sup>13</sup> Briefly, an activity based electrophoretic mobility shift assay (EMSA) experiment is conducted with a microfluidic electrophoresis technology (Caliper LabChip® 3000, Caliper Life Sciences/Perkin Elmer). The deacetylation level of a FAM-labelled acetylated peptide based on compounds HDAC activity is detected via changes in the electrophoretic mobility of the peptide. HDAC proteins are diluted in an assay buffer made of 100 mM HEPES, pH 7.5, 0.1% BSA, 0.01% Triton X-100 and 25 mM KCl and 10 µL is added in a 384-well plate. Test compounds in diluted from 10 mM DMSO stock solutions are introduced using a Labcyte Echo acoustic dispensing robot. (TSA, JNJ-26481585, and MS-275 are compounds with known HDAC IC<sub>50</sub> values and are used as control compounds. Other controls are a well without protein for 0% protein activity [100% acetylated peptide] and a DMSO [no inhibitor] well for 100% protein activity [0% acetylated peptide]). 10 µL FAM-labelled acetylated peptide prediluted in the assay buffer is added and the relative signal intensity from acetylated vs deacetylated peptide is measured following separation in an electrophoretic gel. The product to sum ratio (PSR) which is a concentration-dependent measure of activity is determined using the equation

$$PSR = \frac{P}{S + P}$$

Where P = product intensity, and S = substrate intensity

The % inhibition, P<sub>inh</sub>, is obtained from the equation

$$P_{inh} = (PSR_{0\%inh} - PSR_{comp}) / (PSR_{0\%inh} - PSR_{100\%inh}) \times 100\%$$

Where PSR<sub>comp</sub>, PSR<sub>0%inh</sub>, and PSR<sub>100%inh</sub> are the PSRs in the presence of inhibitor, absence of inhibitor, and absence of protein, respectively.

IC<sub>50</sub> were determined from a plot of compound concentration vs P<sub>inh</sub>, fitted to a 4-parameter sigmoidal dose-response curve on the XLfit software.

To determine the inhibition kinetics of the compounds, the enzyme inhibition in 10 samples at compounds' concentrations ranging from 3.6 to 18.8 nM were monitored for a period of ~5 h. The time-dependent inhibition data were fitted using a hyperbolic fitting algorithm to determine the observed rate constants (K<sub>obs</sub>) at each concentration. The K<sub>obs</sub> were plotted against [compound] and a 2-step reversible inhibition model (See below) was used to determine K<sub>i</sub> as:  $K_{obs} = k_{-2} + k_2 \times [I] / ([I] + K_i)$

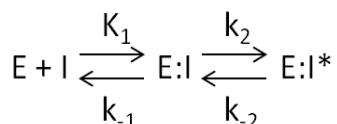

### Determination of Covalency Using Intact Mass Analysis

The covalent modification of the purified proteins (HDACs) with the compounds were evaluated using intact mass analysis by liquid chromatography-mass spectrometry instrument (LC-MS/MS).

The reaction solution (50 µL) was prepared in a 1.5-mL Eppendorf tube and contained the protein (10 µM), the compound (50 µM, 5:1 ratio), HEPES buffer (20 mM, pH 8), 2% DMSO, 2% glycerol, and 40 mM NaCl. The reaction was allowed to proceed for 2 h at 30 °C. Thereafter, the reaction was quenched by the addition of 200 µL of cold acetone and incubated at -20 °C for 1 h. Then, the tube was centrifuged for 10 min at 10,000 xg, the supernatant was discarded, and the pellet was washed by adding 200 µL of cold acetone and centrifugation at 10,000 xg for 10 min. The pellet was re-dissolved in 50 µL of 80% formic acid and incubated at -20 °C for 10 min. 10 µL of the solution was diluted in 90 µL of MQ water, and 0.5 µL was injected into the LC/MS/MS for intact mass analysis.

The LC-MS/MS instrument comprises of a Waters G2-XS quadrupole-time of flight (QToF) mass spectrometer and a Waters Acuity M-class Ultra-High Performance Liquid Chromatography (UPLC) system. The M-class UPLC system includes a micro binary solvent manager ( $\mu$ BSM), a micro sample manager ( $\mu$ SM), and an IonKey (iKey) separation system. The mobile phase consisted of: A) 0.1% (v/v) formic acid in MilliQ water; B) 0.1% (v/v) formic acid acetonitrile. Gradients were run over 12 min and proceeded as follows: A:B, 85:15, 0.0 – 1 min, 85:15  $\rightarrow$  10:90, 1 – 7 min, 10:90, 7 – 9 min, 10:90  $\rightarrow$  85:15, 9 – 9.5 min, 85:15, 9.5 – 12 min. The analytical column was a Waters BEH C4 iKey 1.7  $\mu$ m (50  $\times$  0.15 mm) column with pore sizes of 300 Å. The TOF MS data was collected in positive ion mode ( $m/z$  of 400-2000 Da) using MassLynx software (Waters). The spectral deconvolution was performed using UNIFI software (Waters). The added mass of the protein upon covalent modification to cysteine residues were specified. Multiple modifications were allowed. All the adducts with signal intensities of <2% of the base peak were ignored. The % modification was calculated as the adduct signal intensity over the total intensities of the protein peaks and the adducts.

### Plasma Stability Study

The plasma stability of the compounds was evaluated in human plasma provided from Sigma Aldrich, Oakville, Canada. The main stock solutions of the compounds were prepared at 10 mM in DMSO, which further diluted to 100  $\mu$ M in 50% acetonitrile (ACN) / 50% water. Aliquots of 356.5  $\mu$ L of plasma proteins (2 aliquots per compound) were transferred to a test vial. The vials were placed in a heating block and were allowed to equilibrate at 37 °C for 5 min. Then, 3.5  $\mu$ L of 100  $\mu$ M compound solutions were added to each vial (final concentration of 1  $\mu$ M) to start the reaction. Three quality control (QC) samples at 100 nM, 500 nM, and 1000 nM were prepared in 0.5% ACN independently of those used for the plasma stability assays. The vial contents were transferred in 50  $\mu$ L aliquots at time points of 0, 15, 30 and 60 minutes to a 96-well autosampler plate containing 150  $\mu$ L of protein precipitation solution to quench the reactions. Ice-cold acetonitrile containing internal standards (200 nM Dexamethasone) was used as the protein precipitation solution. After centrifugation of the plate at 4 °C, 5500 rpm for 15 min, the supernatant was diluted 10 times in MQ water. The diluted solution (5  $\mu$ L) was injected into the Liquid Chromatography-Mass Spectrometry instrument (LC/MS/MS) for quantitative analysis.

The LC-MS/MS instrument comprises of a Waters G2-XS quadrupole-time of flight (QToF) mass spectrometer and a Waters Acuity I-class Ultra-High-Performance Liquid Chromatography (UPLC) system. The M-class UPLC system includes a binary solvent manager (BSM), an Acquity sample manager (SM), and a Waters T3 BEH Peptide C18 1.7  $\mu$ m (50  $\times$  2.1 mm) column. The mobile phase consisted of: A) 0.1% (v/v) formic acid in MilliQ water; B) 0.1% (v/v) formic acid acetonitrile. Gradients were run over 3 min and proceeded as follows: A:B, 85:15, 0.0 – 0.2 min, 85:15  $\rightarrow$  10:90, 0.2 – 1 min, 10:90, 1 – 2 min, 10:90  $\rightarrow$  85:15, 2 – 2.1 min, 85:15, 2.1 – 3 min. The MS data was collected via high resolution MS (HRMS) in positive ion mode.

All calculations were carried out using Microsoft Excel. Peak areas were determined from extracted ion chromatograms. The in vitro half-life ( $t_{1/2}$ ) of parent compounds were determined by regression analysis of the percent parent disappearance vs. time curve.

### Whole Blood Stability

The whole blood stability of the compounds was evaluated in human whole blood (Pooled gender, anticoagulant: K<sub>3</sub>EDTA) provided from BioIVT, Hicksville, New York, United States. The main stock solutions of the compounds were prepared at 10 mM in DMSO, which further diluted to 100  $\mu$ M in 50% acetonitrile (ACN) / 50% water. Aliquots of 356.5  $\mu$ L of plasma proteins (2 aliquots per compound) were transferred to a test vial. The vials were placed in a heating block and were allowed to equilibrate at 37 °C for 5 min. Then, 3.5  $\mu$ L of 100  $\mu$ M compound solutions were added to each vial (final concentration of 1  $\mu$ M) to start the reaction. Three quality control (QC) samples at 100 nM, 500 nM, and 1000 nM were prepared in 0.5% ACN independently of those used for the plasma stability assays. The vial contents were transferred in 50  $\mu$ L aliquots at time points of 0, 15, 30 and 60 minutes to a 96-well autosampler plate containing 150  $\mu$ L of protein precipitation solution to quench the reactions. Ice-cold acetonitrile containing internal standards (200 nM Dexamethasone) was used as the protein precipitation solution. After centrifugation of the plate at 4 °C, 5500 rpm for 15 min, the supernatant was diluted 10 times in MQ water.

The diluted solution (5  $\mu$ L) was injected into the Liquid Chromatography-Mass Spectrometry instrument (LC/MS/MS) for quantitative analysis.

The LC-MS/MS instrument comprises of a Waters G2-XS quadrupole-time of flight (QToF) mass spectrometer and a Waters Acuity I-class Ultra-High-Performance Liquid Chromatography (UPLC) system. The M-class UPLC system includes a binary solvent manager (BSM), an Acquity sample manager (SM), and a Waters T3 BEH Peptide C18 1.7  $\mu$ m (50  $\times$  2.1 mm) column. The mobile phase consisted of: A) 0.1% (v/v) formic acid in MilliQ water; B) 0.1% (v/v) formic acid acetonitrile. Gradients were run over 3 min and proceeded as follows: A:B, 85:15, 0.0 – 0.2 min, 85:15  $\rightarrow$  10:90, 0.2 – 1 min, 10:90, 1 – 2 min, 10:90  $\rightarrow$  85:15, 2 – 2.1 min, 85:15, 2.1 – 3 min. The MS data was collected via high resolution MS (HRMS) in positive ion mode.

All calculations were carried out using Microsoft Excel. Peak areas were determined from extracted ion chromatograms. The in vitro half-life ( $t_{1/2}$ ) of parent compounds were determined by regression analysis of the percent parent disappearance vs. time curve.

### ***In Vivo* PK Study**

The *in vivo* pharmacokinetics (PK) was evaluated in Balb/C male mice. In order to prepare the dose, the test compound was dissolved in 1% DMSO, 50% PEG-400, 5% TWEEN-80, 44% Water at 10 mg/mL using the following procedure: the test compound was weighted in a clean glass vial (11.25 mg) and 0.011 mL of DMSO, 0.563 mL of PEG400, 0.056 mL of TWEEN-80, and 0.495 mL of Water were added subsequently into the glass vial. The vial was vortexed and sonicated following the addition of each reagent. to get a 10 mg/mL solution. Three male CD-1 mice of approximately 6-8 weeks of age, and 20-30 g of weight obtained from Zhejiang Vital River Laboratory Animal Technology Co., Ltd (China) were selected for IP dosing. The mice had free access to food and water, were inspected for clinical signs and were weighted once prior to dosing. The mice were dosed with the test compound (50 mg/Kg, IP) once. The blood (30  $\mu$ L) was collected at dorsal metatarsal vein (heart puncture for 12-h timepoint) at 5, 15, 30 min, 1, 2, 4, 6, 8, 12 hours post dose. The blood was transferred into a collection tube with heparin as an anticoagulant, centrifuged at 4000 g for 5 minutes at 4°C. The plasma samples were stored in a freezer at -75 $\pm$ 15°C prior to analysis.

The desired serial concentrations of working solutions were achieved by diluting stock solution of analyte with 50% acetonitrile in MQ solution. 5  $\mu$ L of working solutions (2, 4, 20, 100, 200, 1000, 2000, 4000 ng/mL) were added to 10  $\mu$ L of the blank CD1 mouse plasma to achieve calibration standards of 1~1000 ng/mL (1, 2, 10, 50, 100, 500, 1000, 2000 ng/mL) in a total volume of 15  $\mu$ L. Four quality control (QC) samples at 2 ng/mL, 5 ng/mL, 50 ng/mL and 1600 ng/mL for plasma were prepared independently of those used for the calibration curves. These QC samples were prepared on the day of analysis in the same way as calibration standards.

15  $\mu$ L of standards, QC samples, or unknown samples (10  $\mu$ L plasma with 5  $\mu$ L blank solution) were added to 200  $\mu$ L of acetonitrile containing IS mixture (Verapamil 2 ng/mL, Dexamethasone 50 ng/mL) for precipitating protein, respectively. Then the samples were vortexed for 30 s. After centrifugation at 4 °C, 3900 rpm for 15 min, the supernatant was diluted 3 times with MQ water. The diluted solution (3  $\mu$ L) was injected into the Liquid Chromatography-Mass Spectrometry instrument (LC/MS/MS) for quantitative analysis.

The LC-MS/MS instrument comprise of an API 5500 mass spectrometer (AB Inc. Canada) (serial# EF20351803) and a Shimadzu High Performance Liquid Chromatography (HPLC) system. The HPLC comprises of several modules including DGU-20A5R (serial# L20705518892 IX), LC-30AD (serial# L20555510778 AE and L20555510647 AE), SIL-30AC (serial# L20565504943 AE), Rack Changer II (serial# L20585501071 SS), CTO-30A (serial# L20575501294 CD), and CBM-20A (serial# L20235533959 CD). The mobile phase consisted of: A) 0.1% (v/v) formic acid in MilliQ water/acetonitrile (95:5); B) 0.1% (v/v) formic acid in MilliQ water/acetonitrile (5:95). Gradients were run over 2.5 min and proceeded as follows: A:B, 90:10, 0.0 – 0.2 min, 90:10  $\rightarrow$  10:90, 0.2 – 1.9 min, 10:90, 1.9 – 2.2 min, 10:90  $\rightarrow$  90:10, 2.20 – 2.21 min, 90:10, 2.21 – 2.5 min. The analytical column was an Agilent ZORBAX XDB-Phenyl 5  $\mu$ m (50  $\times$  2.1 mm) column. The MS data was collected via multiple reaction monitoring in positive ion mode.

The PK data was analyzed using WinNonlin (Phoenix™, version 6.1). The following pharmacokinetic parameters were calculated from the plasma concentration versus time data via noncompartmental analysis method:  $T_{1/2}$ ,  $C_{max}$ ,  $AUC_{last}$ ,  $AUC_{inf}$ ,  $MRT_{inf}$ ,  $Cl$ .

### Kinetic Solubility of lead compounds in PBS by HPLC

Solid compounds were weighed fresh in a 2-mL vial and diluted with DMSO to obtain 10 mM stock solutions. To prepare a calibration curve, an aliquot of the 10 mM stock solution was diluted with 100% DMSO to five different concentrations (20 – 500  $\mu$ M). The remaining aliquot of the 10 mM stock solution was diluted in three vials to 300  $\mu$ M in PBS pH 7.4, 5% DMSO for kinetic solubility. The triplicate solubility sample solutions were stirred at 1000 rpm for 2 hours. Afterwards, the sample solutions were immediately filtered through a 0.45  $\mu$ m nylon filter and the filtered solution was diluted 1:1 with 100% DMSO into an analytical HPLC vial. The calibration curve samples and solubility samples were injected onto an Agilent ZORBAX XDB HPLC column (C18) at 1.2 mL/min with a gradient of 98% H<sub>2</sub>O:2% ACN (+ 0.1% formic acid) to 100% ACN (+ 0.1% formic acid) over 8 min and then 2 min at 100% ACN, 0.1% formic acid. The absorbance values at 254 nm which corresponded to each compound were integrated and a calibration curve was constructed by plotting absorbance integration vs concentration. The integration of the kinetic solubility samples was related to the slope of the calibration curve, also accounting for the final 1:1 dilution, to calculate the kinetic solubility of each compound.

### PAMPA Assay

The permeability of the compounds was evaluated using the PAMPA assay. The PAMPA assembly was consisted of the acceptor plate (MultiScreen IP Filter Plate, Millipore Sigma, Canada) and the donor plate (96 well Collection Plate, Millipore Sigma, Canada). The artificial membrane solution was prepared as 1.8 % solution (w/v) of lecithin (Sigma Aldrich, Oakville, Canada) in dodecane and the mixture was sonicated to ensure a complete dissolution. Five  $\mu$ L of the lecithin/dodecane mixture was pipetted into each acceptor plate well (top compartment). Thereafter, 300  $\mu$ L of PBS (1X PBS, pH 7.4, 5% DMSO) solution was added to each well of the acceptor plate and 300  $\mu$ L of drug-containing donor solutions (50  $\mu$ M compounds in 51X PBS, pH 7.4, 5% DMSO) to each well of the donor plate (bottom compartment) in triplicate. The acceptor plate was placed into the donor plate and the assembly was incubated at room temperature for 16 hours. After incubation, aliquots of 10  $\mu$ L from each well of acceptor and donor plate were transferred into a 96-well plate and 190  $\mu$ L of acetonitrile (containing IS: 300 nM Dexamethasone, 100 nM Phenacetin), was added into each well. The plate was vortexed at 750 rpm for 2 min and was centrifuged at 7,000 g for 10 minutes. The concentration of the compounds was determined by LC/MS/MS.

The effective permeability ( $P_e$ ), in units of centimeter per second, was calculated using the following equation:

$$\text{Log } P_e = \text{Log} \left\{ C \times \left[ -\text{Ln} \left( 1 - \frac{[\text{drug}]_{\text{acceptor}}}{[\text{drug}]_{\text{equilibrium}}} \right) \right] \right\}$$

Where:  $C = VD \times VA / [(VD + VA) \times t \times A]$ ;  $VD$  = volume of donor compartment (0.30 mL);  $VA$  = volume of acceptor compartment (0.30 mL);  $A$  = filter area (0.24 cm<sup>2</sup> for Multi-Screen Permeability Filter plate); and  $t$  = incubation time (in seconds).

## **Product Characterization**

### **Product A (Secondary Sulfonamides):**

**Compound 2A:** Yield 68%.  $^1\text{H}$  NMR (400 MHz, Chloroform-*d*)  $\delta$  7.31 – 7.22 (m, 5H), 5.41 (s, 1H), 4.40 (d,  $J$  = 6.3 Hz, 2H).  $^{19}\text{F}$  NMR (377 MHz, Chloroform-*d*)  $\delta$  -136.5 – -137.5 (m), -146.4 (tt,  $J$  = 21.0, 6.7 Hz), -158.9 (tt,  $J$  = 21.3, 6.5 Hz).  $^{13}\text{C}$  NMR (101 MHz, Chloroform-*d*)  $\delta$  145.5, 145.0, 142.8 (d,  $J$  = 12.6 Hz), 138.8 (d,  $J$  = 21.3 Hz), 137.3, 134.8, 60.5, 50.8 – 49.2 (m), 49.1 (d,  $J$  = 4.8 Hz), 47.7, 47.5, 14.2. MS ESI+ Found 360.21 ( $\text{M}+\text{Na}^+$ ), ESI- Found 336.17 ( $\text{M}-\text{H}^+$ ), 372.23 ( $\text{M}+\text{Cl}^-$ )

**Compound 3A:** Yield 78%.  $^1\text{H}$  NMR (400 MHz, Chloroform-*d*)  $\delta$  7.29 – 7.23 (m, 2H), 7.04 – 6.98 (m, 2H), 5.50 – 5.34 (m, 1H), 4.36 (d,  $J$  = 6.2 Hz, 2H).  $^{19}\text{F}$  NMR (376 MHz, Chloroform-*d*)  $\delta$  -112.9 (td,  $J$  = 8.6, 4.4 Hz), -136.6 – -137.0 (m), -145.9 (tt,  $J$  = 20.8, 6.4 Hz), -158.5 (tt,  $J$  = 20.9, 6.4 Hz).  $^{13}\text{C}$  NMR (101 MHz,  $\text{CDCl}_3$ )  $\delta$  163.9, 161.4, 130.9, 130.8, 129.9, 129.9, 129.7, 129.6, 129.4, 129.3, 116.3, 116.1, 115.9, 115.8, 115.7, 48.5, 47.0, 46.8. MS ESI- Found 354.31 ( $\text{M}-\text{H}^+$ )

**Compound 4A:** Yield 76%.  $^1\text{H}$  NMR (400 MHz, Chloroform-*d*)  $\delta$  7.58 (d,  $J$  = 8.0 Hz, 2H), 7.43 (d,  $J$  = 8.0 Hz, 2H), 5.85 (t,  $J$  = 6.4 Hz, 1H), 4.45 (d,  $J$  = 6.3 Hz, 2H).  $^{19}\text{F}$  NMR (376 MHz, Chloroform-*d*)  $\delta$  -63.0, -136.3 – -137.8 (m), -145.6 (tt,  $J$  = 20.7, 6.5 Hz), -157.9 – -159.8 (m).  $^{13}\text{C}$  NMR (101 MHz, Chloroform-*d*)  $\delta$  139.1, 130.9, 130.5, 128.4, 125.7, 125.7, 125.7, 125.6, 125.1, 122.4, 47.1. MS ESI- Found 404.07 ( $\text{M}-\text{H}^+$ )

**Compound 5A:** Yield 53%.  $^1\text{H}$  NMR (400 MHz, Chloroform-*d*)  $\delta$  7.10 – 6.98 (m, 2H), 6.59 – 6.48 (m, 2H), 5.47 (t,  $J$  = 6.3 Hz, 1H), 4.30 (d,  $J$  = 6.2 Hz, 2H), 2.93 (s, 6H).  $^{19}\text{F}$  NMR (376 MHz, Chloroform-*d*)  $\delta$  -135.0 – -138.7 (m), -147.8 (tt,  $J$  = 21.2, 6.2 Hz), -158.7 – -162.4 (m).  $^{13}\text{C}$  NMR (101 MHz,  $\text{CDCl}_3$ )  $\delta$  150.3, 142.7, 136.2, 129.3, 122.0, 117.2, 111.9, 47.7, 40.3. MS ESI- Found 379.32 ( $\text{M}-\text{H}^+$ )

**Compound 6A:**  $^1\text{H}$  NMR (400 MHz,  $\text{CDCl}_3$ )  $\delta$  7.24 (s, 2H), 7.10 (d,  $J$  = 4.6 Hz, 2H), 5.44 (t,  $J$  = 6.3 Hz, 1H), 4.35 (d,  $J$  = 6.3 Hz, 2H), 2.33 (s, 3H).  $^{19}\text{F}$  NMR (376 MHz,  $\text{CDCl}_3$ )  $\delta$  -136.3 – -137.4 (m), -147.0 (tt,  $J$  = 20.8, 6.4 Hz), -158.7 – -160.0 (m).  $^{13}\text{C}$  NMR (101 MHz,  $\text{CDCl}_3$ )  $\delta$  138.5, 138.4, 134.1, 131.6, 129.9, 129.5, 129.3, 128.1, 127.8, 127.7, 127.6, 49.1, 49.0, 47.7, 34.7, 25.3, 21.2, 21.1, 21.0. MS ESI Found 350.20 ( $\text{M}-\text{H}^+$ ), 386.27 ( $\text{M}+\text{Cl}^-$ ); ESI+ Found 374.25 ( $\text{M}+\text{Na}^+$ ).

**Compound 7A:** Yield: 86%.  $^1\text{H}$  NMR (400 MHz, Chloroform-*d*)  $\delta$  7.31 – 7.26 (m, 2H), 7.15 (d,  $J$  = 8.1 Hz, 2H), 5.44 (t,  $J$  = 6.4 Hz, 1H), 4.38 (d,  $J$  = 6.4 Hz, 2H), 1.29 (s, 9H).  $^{19}\text{F}$  NMR (376 MHz, Chloroform-*d*)  $\delta$  -136.5 – -137.0 (m), -146.5 (tt,  $J$  = 20.8, 6.3 Hz), -159.2 (tt,  $J$  = 21.3, 6.4 Hz).  $^{13}\text{C}$  NMR (101 MHz,  $\text{CDCl}_3$ )  $\delta$  151.6, 145.4, 142.7, 138.8, 131.7, 128.0, 125.4, 117.1, 47.4, 34.5, 31.3, 31.1. MS ESI- Found 392.37 ( $\text{M}-\text{H}^+$ ) and 428.34 ( $\text{M}+\text{Cl}^-$ ). MS ESI+ found 416.31 ( $\text{M}+\text{Na}^+$ ).

**Compound 8A:**  $^1\text{H}$  NMR (400 MHz,  $\text{CDCl}_3$ )  $\delta$  8.60 – 8.49 (m, 2H), 7.32 – 7.22 (m, 2H), 6.64 (s, 1H), 4.42 (s, 2H).  $^{19}\text{F}$  NMR (376 MHz,  $\text{CDCl}_3$ )  $\delta$  -136.5 – -137.1 (m), -145.3 (tt,  $J$  = 21.1, 6.5 Hz), -158.2 (tt,  $J$  = 20.8, 6.4 Hz).  $^{13}\text{C}$  NMR (101 MHz,  $\text{CDCl}_3$ )  $\delta$  149.8, 145.3, 122.5, 60.4, 46.2, 21.1, 14.2. MS ESI- Found 337.18 ( $\text{M}-\text{H}^+$ ), ESI+ Found 339.23 ( $\text{M}+\text{H}^+$ ).

**Compound 9A:** Yield: 67%.  $^1\text{H}$  NMR (400 MHz, Acetonitrile-*d*<sub>3</sub>)  $\delta$  8.57 – 8.46 (m, 2H), 7.59 (dddd,  $J$  = 9.5, 8.2, 6.0, 2.5 Hz, 1H), 7.29 – 7.21 (m, 2H), 6.92 (s, 1H), 4.25 (s, 2H).  $^{19}\text{F}$  NMR (376 MHz, Acetonitrile-*d*<sub>3</sub>)  $\delta$  -136.5 – -136.8 (m), -138.5 – -138.8 (m), -149.5 – -150.2 (m), -154.0 – -154.6 (m).  $^{13}\text{C}$  NMR (101 MHz, Acetonitrile-*d*<sub>3</sub>)  $\delta$  206.5, 149.8, 149.7, 145.9, 122.4, 112.2, 112.2, 112.0, 112.0, 45.3, 29.9. MS ESI- Found 319.13 ( $\text{M}-\text{H}^+$ ), ESI+ Found 321.27 ( $\text{M}+\text{H}^+$ )

**Compound 10A:**  $^1\text{H}$  NMR (400 MHz,  $\text{CDCl}_3$ )  $\delta$  7.47 (tdd,  $J$  = 8.5, 5.8, 2.5 Hz, 1H), 7.28 (dt,  $J$  = 5.2, 2.5 Hz, 3H), 7.20 (dd,  $J$  = 7.1, 2.6 Hz, 2H), 5.42 (t,  $J$  = 6.2 Hz, 1H), 4.28 (d,  $J$  = 6.2 Hz, 2H).  $^{19}\text{F}$  NMR (376 MHz,  $\text{CDCl}_3$ )  $\delta$  -135.2 (ddt,  $J$  = 21.3, 13.9, 7.0 Hz), -135.6 – -136.3 (m), -146.7 (tt,  $J$  = 20.0, 8.1 Hz), -151.6 (t,  $J$  = 20.2 Hz).  $^{13}\text{C}$  NMR (101 MHz,  $\text{CDCl}_3$ )  $\delta$  147.6, 143.2, 142.2, 135.2, 128.7, 128.3, 128.0, 125.4, 112.1, 112.1, 111.9, 111.8, 47.5. MS ESI+ Found 320.19 ( $\text{M} + \text{H}^+$ ), 342.33 ( $\text{M} + \text{Na}^+$ ), 661.25 ( $2\text{M} + \text{Na}^+$ ); ESI- Found 318.23 ( $\text{M} - \text{H}^+$ ), 351.20 ( $\text{M} + \text{Cl}^-$ ), 637.49 ( $2\text{M} - \text{H}^+$ )

**Compound 11A:** Yield: 88%.  $^1\text{H}$  NMR (400 MHz, Chloroform-*d*)  $\delta$  7.51 (dddd,  $J$  = 8.6, 7.7, 6.1, 2.5 Hz, 1H), 7.25 – 7.18 (m, 2H), 7.04 – 6.95 (m, 2H), 5.39 (t,  $J$  = 6.2 Hz, 1H), 4.25 (d,  $J$  = 6.2 Hz, 2H).  $^{19}\text{F}$  NMR

(376 MHz, Chloroform-*d*)  $\delta$  -112.9 – -113.9 (m), -135.2 – -135.6 (m), -146.2 (tt, *J* = 19.0, 7.9 Hz), -151.0 – -151.7 (m).  $^{13}\text{C}$  NMR (101 MHz, Chloroform-*d*)  $\delta$  163.8, 161.3, 131.2, 131.2, 129.8, 129.7, 115.8, 115.6, 112.1, 112.0, 111.9, 111.8, 46.7. MS ESI- Found 336.15 and 372.24 (*M* + *Cl*<sup>-</sup>), ESI+ Found 360.23 (*M* + *Na*<sup>+</sup>)

**Compound 12A:** Yield: 77%.  $^1\text{H}$  NMR (400 MHz, Acetonitrile-*d*<sub>3</sub>)  $\delta$  7.55 (dddd, *J* = 9.6, 8.3, 6.0, 2.5 Hz, 1H), 7.36 – 7.26 (m, 1H), 7.10 – 7.05 (m, 1H), 7.05 – 6.97 (m, 2H), 6.67 (s, 1H), 4.23 (s, 2H).  $^{19}\text{F}$  NMR (376 MHz, Acetonitrile-*d*<sub>3</sub>)  $\delta$  -114.9 (td, *J* = 9.4, 5.9 Hz), -136.4 – -137.4 (m), -138.5 – -139.5 (m), -150.1 (tt, *J* = 19.1, 8.0 Hz), -154.3 – -154.9 (m).  $^{13}\text{C}$  NMR (101 MHz, Acetonitrile-*d*<sub>3</sub>)  $\delta$  163.8, 139.5, 139.4, 130.4, 130.3, 123.8, 123.8, 114.7, 114.5, 114.4, 114.2, 112.2, 112.2, 112.0, 112.0, 46.0, 46.0. MS ESI- Found 336.15

**Compound 13A:** Yield: 79%.  $^1\text{H}$  NMR (400 MHz, Acetonitrile-*d*<sub>3</sub>)  $\delta$  7.50 (dddd, *J* = 9.6, 8.3, 6.0, 2.5 Hz, 1H), 7.38 – 7.23 (m, 2H), 7.12 (td, *J* = 7.5, 1.2 Hz, 1H), 7.07 – 6.96 (m, 1H), 6.63 (s, 1H), 4.30 (d, *J* = 6.0 Hz, 2H).  $^{19}\text{F}$  NMR (376 MHz, Acetonitrile-*d*<sub>3</sub>)  $\delta$  -119.7 (dt, *J* = 12.2, 6.5 Hz), -137.0 (ddt, *J* = 20.4, 13.3, 7.1 Hz), -138.7 – -139.2 (m), -150.1 (ddd, *J* = 27.4, 18.6, 8.1 Hz), -154.4 – -155.0 (m).  $^{13}\text{C}$  NMR (101 MHz, Acetonitrile-*d*<sub>3</sub>)  $\delta$  161.8, 159.4, 130.7, 130.7, 130.1, 130.0, 124.3, 124.3, 123.4, 123.3, 115.2, 114.9, 112.2, 112.1, 112.0, 111.9, 40.5, 40.5. MS ESI- Found 336.17

**Compound 14A:** Yield: 85%.  $^1\text{H}$  NMR (400 MHz, DMSO-*d*<sub>6</sub>)  $\delta$  9.02 (s, 1H), 8.39 (dt, *J* = 4.9, 1.3 Hz, 1H), 7.74 (td, *J* = 7.7, 1.8 Hz, 1H), 7.66 (dddd, *J* = 10.1, 8.2, 6.0, 2.5 Hz, 1H), 7.34 (d, *J* = 7.8 Hz, 1H), 7.24 (ddd, *J* = 7.6, 4.8, 1.1 Hz, 1H), 4.28 (s, 2H).  $^{19}\text{F}$  NMR (376 MHz, DMSO-*d*<sub>6</sub>)  $\delta$  -135.3 (ddt, *J* = 26.8, 13.2, 6.9 Hz), -137.4 – -137.9 (m), -148.9 (tt, *J* = 21.6, 8.0 Hz), -153.2 (t, *J* = 21.6 Hz).  $^{13}\text{C}$  NMR (101 MHz, DMSO-*d*<sub>6</sub>)  $\delta$  156.9, 149.2, 144.7, 143.2, 137.2, 123.0, 122.3, 112.4, 112.3, 112.1, 112.1, 48.2. MS ESI- Found 319.13 ESI+ Found 321.21 and 343.19 (*M* + *Na*<sup>+</sup>)

**TO-317-A:** Yield: 89%.  $^1\text{H}$  NMR (400 MHz, Acetone-*d*<sub>6</sub>)  $\delta$  8.49 (d, *J* = 2.3 Hz, 1H), 8.46 (dd, *J* = 4.8, 1.6 Hz, 1H), 7.93 (t, *J* = 5.8 Hz, 1H), 7.74 (dt, *J* = 7.9, 2.0 Hz, 1H), 7.63 (dddd, *J* = 10.1, 8.3, 5.9, 2.5 Hz, 1H), 7.31 (dd, *J* = 7.9, 4.8 Hz, 1H), 4.39 (d, *J* = 5.2 Hz, 2H).  $^{19}\text{F}$  NMR (376 MHz, Acetone-*d*<sub>6</sub>)  $\delta$  -136.7 (ddt, *J* = 18.8, 13.3, 7.3 Hz), -138.3 – -139.0 (m), -150.4 (tt, *J* = 19.9, 8.1 Hz), -154.4 – -154.9 (m).  $^{13}\text{C}$  NMR (101 MHz, Acetone-*d*<sub>6</sub>)  $\delta$  205.4, 149.4, 148.9, 135.5, 132.6, 123.3, 112.2, 112.1, 111.9, 111.9, 44.2. MS ESI- Found 319.06 (*M* - *H*<sup>+</sup>); ESI+ Found 320.91 (*M* + *H*<sup>+</sup>)

### **Product B (Tertiary Sulfonamide, Ester Derivatives):**

**Compound 2B:** Yield: 66%.  $^1\text{H}$  NMR (400 MHz, Chloroform-*d*)  $\delta$  7.95 – 7.89 (m, 2H), 7.31 – 7.21 (m, 5H), 7.15 (dd, *J* = 6.6, 3.0 Hz, 2H), 4.60 (s, 2H), 4.52 (s, 2H), 1.62 (s, 9H).  $^{19}\text{F}$  NMR (376 MHz, Chloroform-*d*)  $\delta$  -134.8 – -135.3 (m), -146.4 (tt, *J* = 21.0, 6.6 Hz), -158.7 – -159.3 (m).  $^{13}\text{C}$  NMR (101 MHz, Chloroform-*d*)  $\delta$  165.2, 139.3, 134.2, 132.0, 129.8, 128.7, 128.6, 128.4, 128.2, 81.3, 51.8, 51.5, 28.1. MS ESI- Found 562.42 (*M* + *Cl*<sup>-</sup>), ESI+ Found 550.41 (*M* + *Na*<sup>+</sup>), 1077.66 (2*M* + *Na*<sup>+</sup>).

**Compound 3B:** Yield: 72%.  $^1\text{H}$  NMR (400 MHz, Chloroform-*d*)  $\delta$  7.95 – 7.85 (m, 2H), 7.26 – 7.18 (m, 2H), 7.18 – 7.10 (m, 2H), 6.98 (dt, *J* = 8.1, 5.4 Hz, 2H), 4.56 (d, *J* = 3.6 Hz, 2H), 4.51 (d, *J* = 3.8 Hz, 2H), 1.63 (d, *J* = 3.7 Hz, 9H).  $^{19}\text{F}$  NMR (376 MHz, Chloroform-*d*)  $\delta$  -113.2 (q, *J* = 7.9 Hz), -134.4 – -136.0 (m), -145.8 (td, *J* = 21.2, 10.6 Hz), -158.6 (t, *J* = 19.8 Hz).  $^{13}\text{C}$  NMR (101 MHz, Chloroform-*d*)  $\delta$  165.1, 161.4, 139.0, 132.1, 130.4, 130.4, 130.2, 129.8, 128.2, 115.8, 115.6, 81.4, 51.4, 51.3, 28.2. MS ESI- Found 544.46 (*M*-*H*<sup>+</sup>) and 580.48 (*M*+*Cl*<sup>-</sup>); ESI+ Found 546.54 (*M*+*H*<sup>+</sup>)

**Compound 4B:** Yield: 80%.  $^1\text{H}$  NMR (400 MHz, Chloroform-*d*)  $\delta$  7.90 – 7.82 (m, 2H), 7.51 (d, *J* = 8.0 Hz, 2H), 7.30 (d, *J* = 8.0 Hz, 2H), 7.18 (d, *J* = 8.2 Hz, 2H), 4.58 (d, *J* = 4.7 Hz, 4H), 1.61 (s, 9H).  $^{19}\text{F}$  NMR (376 MHz, Chloroform-*d*)  $\delta$  -62.8, -134.4 – -136.6 (m), -145.5 (tt, *J* = 21.0, 6.6 Hz), -157.6 – -160.2 (m).  $^{13}\text{C}$  NMR (101 MHz, Chloroform-*d*)  $\delta$  165.0, 138.7, 138.7, 132.1, 129.7, 128.8, 128.3, 125.6, 125.5, 81.4, 52.1, 51.8, 28.1. MS ESI Found 630.47 (*M* + *Cl*<sup>-</sup>); ESI+ Found 618.51 (*M* + *Na*<sup>+</sup>).

**Compound 5B:** Yield: 55%.  $^1\text{H}$  NMR (400 MHz, Chloroform-*d*)  $\delta$  8.01 – 7.90 (m, 2H), 7.37 – 7.27 (m, 2H), 7.13 – 7.04 (m, 2H), 6.99 – 6.91 (m, 2H), 4.45 (s, 2H), 4.38 (s, 2H), 2.96 (s, 6H), 1.62 (s, 9H).  $^{19}\text{F}$  NMR (376 MHz, Chloroform-*d*)  $\delta$  -134.9 (dt, *J* = 21.4, 5.6 Hz), -147.3, -159.1 – -159.6 (m).  $^{13}\text{C}$  NMR (101

MHz, CDCl<sub>3</sub>)  $\delta$  165.3, 150.4, 140.0, 131.8, 129.94, 129.9, 129.8, 128.1, 120.9, 120.7, 112.0, 111.5, 81.2, 51.5, 51.3, 40.9, 40.3, 40.2, 28.2. MS ESI- Found 605.53 (M + Cl<sup>-</sup>); ESI+ Found 593.63 (M + Na<sup>+</sup>).

**Compound 6B:** Yield: 54%. <sup>1</sup>H NMR (400 MHz, CDCl<sub>3</sub>)  $\delta$  7.96 – 7.89 (m, 2H), 7.30 – 7.22 (m, 2H), 7.08 (d, *J* = 7.9 Hz, 2H), 7.02 (d, *J* = 8.1 Hz, 2H), 4.60 (s, 2H), 4.47 (s, 2H), 2.33 (s, 3H), 1.63 (s, 9H). <sup>19</sup>F NMR (376 MHz, CDCl<sub>3</sub>)  $\delta$  -135.0 (qd, *J* = 13.1, 7.3 Hz), -146.7 (tt, *J* = 21.0, 6.5 Hz), -158.9 – -159.4 (m). <sup>13</sup>C NMR (101 MHz, CDCl<sub>3</sub>)  $\delta$  165.2, 145.6, 144.9, 143.1, 142.3, 139.5, 138.3, 136.4, 131.9, 131.0, 129.8, 129.33, 128.6, 128.1, 117.5, 81.3, 51.5, 51.4, 51.4, 51.4. MS ESI- Found 576.49 (M+Cl<sup>-</sup>), ESI+ Found 564.52 (M+Na<sup>+</sup>).

**Compound 7B:** Yield: 57%. <sup>1</sup>H NMR (400 MHz, CDCl<sub>3</sub>)  $\delta$  7.92 (dd, *J* = 8.5, 2.9 Hz, 2H), 7.26 (ddd, *J* = 19.1, 8.3, 3.0 Hz, 4H), 7.11 – 7.01 (m, 2H), 4.66 (d, *J* = 3.1 Hz, 2H), 4.46 (d, *J* = 3.0 Hz, 2H), 1.63 (s, 9H), 1.29 (d, *J* = 3.0 Hz, 9H). <sup>19</sup>F NMR (376 MHz, CDCl<sub>3</sub>)  $\delta$  -135.1 (dq, *J* = 19.3, 6.4 Hz), -146.3 – -147.0 (m), -159.1 (t, *J* = 19.5 Hz). <sup>13</sup>C NMR (101 MHz, CDCl<sub>3</sub>)  $\delta$  165.2, 151.6, 139.7, 131.8, 131.0, 129.7, 128.5, 128.1, 125.5, 81.2, 52.1, 51.6, 34.5, 31.2, 28.2. MS ESI- Found 618.54 (M+Cl<sup>-</sup>); ESI+ Found 606.58 (M+Na<sup>+</sup>).

**Compound 8B:** Yield: 62%. <sup>1</sup>H NMR (400 MHz, CDCl<sub>3</sub>)  $\delta$  8.52 (s, 2H), 7.89 – 7.80 (m, 2H), 7.16 (d, *J* = 8.2 Hz, 2H), 7.10 (d, *J* = 4.9 Hz, 2H), 4.53 (s, 4H), 1.59 (s, 9H). <sup>19</sup>F NMR (376 MHz, CDCl<sub>3</sub>)  $\delta$  -134.8 – -135.3 (m), -145.1 (tt, *J* = 21.1, 6.6 Hz), -157.9 – -158.6 (m). <sup>13</sup>C NMR (101 MHz, CDCl<sub>3</sub>)  $\delta$  164.9, 150.2, 145.7, 143.9, 138.2, 132.3, 129.8, 128.4, 122.8, 81.5, 51.9, 51.2, 28.1. MS ESI- Found 563.47 (M+Cl<sup>-</sup>); ESI+ Found 529.46 (M+H<sup>+</sup>), 551.39 (M+Na<sup>+</sup>).

**Compound 9B:** Yield: 66%. <sup>1</sup>H NMR (400 MHz, Acetonitrile-*d*<sub>3</sub>)  $\delta$  8.47 – 8.42 (m, 2H), 7.89 – 7.74 (m, 2H), 7.60 (dddd, *J* = 9.7, 8.2, 5.9, 2.5 Hz, 1H), 7.29 – 7.22 (m, 2H), 7.17 – 7.11 (m, 2H), 4.54 (s, 4H), 1.58 (s, 9H). <sup>19</sup>F NMR (376 MHz, Acetonitrile-*d*<sub>3</sub>)  $\delta$  -134.8 – -135.3 (m), -137.9 – -138.6 (m), -148.9 (tt, *J* = 19.8, 8.8 Hz), -153.4 – -153.9 (m). <sup>13</sup>C NMR (101 MHz, Acetonitrile-*d*<sub>3</sub>)  $\delta$  149.8, 145.0, 140.0, 131.8, 129.2, 128.7, 122.9, 112.9, 112.6, 81.0, 52.1, 52.1, 51.3, 51.3, 27.3. MS ESI- Found 545.39 (M+Cl<sup>-</sup>); ESI+ Found 511.45 (M+H<sup>+</sup>) and 533.21 (M+Na<sup>+</sup>)

**Compound 10B:** Yield: 70%. <sup>1</sup>H NMR (400 MHz, Acetonitrile-*d*<sub>3</sub>)  $\delta$  7.88 – 7.81 (m, 2H), 7.54 (dddd, *J* = 9.8, 8.3, 5.9, 2.5 Hz, 1H), 7.31 – 7.22 (m, 5H), 7.22 – 7.15 (m, 2H), 4.54 (s, 2H), 4.51 (s, 2H), 1.59 (s, 9H). <sup>19</sup>F NMR (376 MHz, Acetonitrile-*d*<sub>3</sub>)  $\delta$  -135.0 – -135.8 (m), -138.1 – -139.1 (m), -149.5 (tt, *J* = 19.7, 8.6 Hz), -153.5 – -154.5 (m). <sup>13</sup>C NMR (101 MHz, Acetonitrile-*d*<sub>3</sub>)  $\delta$  140.6, 135.4, 131.5, 129.2, 128.6, 128.5, 128.3, 127.9, 80.9, 52.0, 51.4, 51.4, 27.3. MS ESI+ Found 532.41 (M + Na<sup>+</sup>); ESI- Found 544.38 (M + Cl<sup>-</sup>)

**Compound 11B:** Yield: 71%. <sup>1</sup>H NMR (400 MHz, Chloroform-*d*)  $\delta$  7.94 – 7.87 (m, 2H), 7.56 – 7.46 (m, 1H), 7.15 (d, *J* = 1.8 Hz, 2H), 7.13 – 7.05 (m, 2H), 7.02 – 6.90 (m, 2H), 4.48 (s, 2H), 4.44 (s, 2H), 1.62 (s, 10H). <sup>19</sup>F NMR (376 MHz, Chloroform-*d*)  $\delta$  -113.4 (td, *J* = 8.2, 7.6, 4.2 Hz), -135.2 – -136.1 (m), -146.2 (tt, *J* = 20.4, 8.2 Hz), -151.1 (td, *J* = 22.1, 20.6, 3.8 Hz). <sup>13</sup>C NMR (101 MHz, Chloroform-*d*)  $\delta$  165.1, 139.3, 132.0, 130.4, 130.3, 129.8, 128.1, 115.8, 115.6, 115.5, 112.5, 112.4, 112.2, 112.2, 81.3, 50.9, 50.8, 50.8, 50.7, 49.4, 28.1. MS ESI- Found 562.44 (M + Cl<sup>-</sup>); ESI+ Found 550.48 (M + H<sup>+</sup>), 1077.86 (2M + H<sup>+</sup>).

**Compound 12B:** Yield: 68%. <sup>1</sup>H NMR (400 MHz, Acetonitrile-*d*<sub>3</sub>)  $\delta$  7.88 – 7.76 (m, 2H), 7.57 (dddd, *J* = 9.7, 8.2, 5.9, 2.5 Hz, 1H), 7.34 – 7.19 (m, 3H), 7.05 – 6.95 (m, 2H), 6.92 (dt, *J* = 10.1, 2.1 Hz, 1H), 4.54 (s, 2H), 4.51 (s, 2H), 1.59 (s, 9H). <sup>19</sup>F NMR (376 MHz, Acetonitrile-*d*<sub>3</sub>)  $\delta$  -114.8 (td, *J* = 9.5, 6.0 Hz), -135.2 (ddt, *J* = 21.4, 14.0, 6.1 Hz), -138.0 – -139.0 (m), -149.2 (tt, *J* = 19.2, 8.4 Hz), -153.6 – -154.3 (m). <sup>13</sup>C NMR (101 MHz, Acetonitrile-*d*<sub>3</sub>)  $\delta$  140.4, 130.4, 129.2, 128.4, 124.4, 117.3, 115.2, 115.0, 114.61, 114.4, 112.8, 112.6, 80.9, 51.8, 51.7, 27.3. MS ESI- Found 562.63 (M + Cl<sup>-</sup>); ESI+ Found 550.51 (M + Na<sup>+</sup>)

**Compound 13B:** Yield: 68%. <sup>1</sup>H NMR (400 MHz, Acetonitrile-*d*<sub>3</sub>)  $\delta$  7.88 – 7.80 (m, 2H), 7.51 (dddd, *J* = 9.8, 8.1, 5.8, 2.5 Hz, 1H), 7.33 – 7.22 (m, 4H), 7.09 (td, *J* = 7.5, 1.2 Hz, 1H), 6.96 (ddd, *J* = 10.3, 8.7, 1.1 Hz, 1H), 4.60 (s, 2H), 4.55 (s, 2H), 1.59 (s, 9H). <sup>19</sup>F NMR (376 MHz, Acetonitrile-*d*<sub>3</sub>)  $\delta$  -118.6 (dt, *J* = 12.0, 6.1 Hz), -135.4 (ddt, *J* = 20.9, 13.7, 6.9 Hz), -138.0 – -139.1 (m), -148.9 – -150.2 (m), -153.8 – -154.4 (m). <sup>13</sup>C NMR (101 MHz, Acetonitrile-*d*<sub>3</sub>)  $\delta$  140.8, 131.5, 131.3, 131.3, 130.3, 130.2, 129.2, 128.0, 124.4,



124.3, 115.3, 115.0, 112.7, 112.5, 80.9, 52.0, 46.1, 27.3. MS ESI- Found 562.58 (M + Cl<sup>-</sup>); ESI+ Found 550.51 (M + Na<sup>+</sup>)

**Compound 14B:** Yield: 62%. <sup>1</sup>H NMR (400 MHz, DMSO-*d*<sub>6</sub>) δ 8.37 – 8.28 (m, 1H), 7.83 (d, *J* = 8.2 Hz, 2H), 7.78 – 7.72 (m, 1H), 7.70 (td, *J* = 7.7, 1.8 Hz, 1H), 7.35 (d, *J* = 8.1 Hz, 2H), 7.27 – 7.16 (m, 2H), 4.67 (s, 2H), 4.56 (s, 2H), 1.55 (s, 9H). <sup>19</sup>F NMR (376 MHz, DMSO-*d*<sub>6</sub>) δ -133.7 (ddt, *J* = 20.8, 13.6, 6.8 Hz), -137.0 – -138.0 (m), -148.1 (tt, *J* = 21.7, 8.1 Hz), -152.9 – -153.6 (m). <sup>13</sup>C NMR (101 MHz, DMSO-*d*<sub>6</sub>) δ 165.1, 162.8, 155.4, 149.4, 141.3, 137.3, 131.2, 129.6, 128.7, 123.2, 123.2, 113.2, 112.9, 81.2, 52.5, 51.9, 36.3, 31.3, 28.2, 14.6. MS ESI- Found 545.40 (M + Cl<sup>-</sup>); ESI+ Found 511.44 (M + H<sup>+</sup>) and 533.26 (M + Na<sup>+</sup>)

**TO-317-B:** Yield: 60%. <sup>1</sup>H NMR (400 MHz, CDCl<sub>3</sub>) δ 8.51 (dd, *J* = 4.8, 1.6 Hz, 1H), 8.35 – 8.28 (m, 1H), 7.93 – 7.84 (m, 2H), 7.58 – 7.47 (m, 2H), 7.22 (ddd, *J* = 7.9, 4.8, 0.9 Hz, 1H), 7.19 – 7.10 (m, 2H), 4.48 (s, 4H), 1.60 (s, 9H). <sup>19</sup>F NMR (376 MHz, CDCl<sub>3</sub>) δ -133.5 (ddt, *J* = 21.7, 14.0, 7.2 Hz), -135.1 (dddd, *J* = 21.9, 13.0, 9.0, 3.9 Hz), -145.6 (tt, *J* = 20.0, 8.1 Hz), -150.7 (td, *J* = 22.0, 20.7, 3.7 Hz). <sup>13</sup>C NMR (101 MHz, CDCl<sub>3</sub>) δ 165.0, 149.6, 145.1, 140.0, 138.9, 136.3, 132.1, 130.6, 129.9, 128.2, 123.6, 112.5, 112.5, 112.3, 112.3, 81.4, 60.4, 51.3, 51.3, 49.2, 49.1, 28.1, 21.0, 14.2. ESI- Found 545.49 (ESI + Cl<sup>-</sup>); ESI+ Found 511.34 (ESI + H<sup>+</sup>), 533.38 (ESI + Na<sup>+</sup>) and 1043.67 (2M + Na<sup>+</sup>).

### **Product C: (Tertiary Sulfonamides, Acid Derivatives):**

**Compound 2C:** Yield: 79%. <sup>1</sup>H NMR (400 MHz, DMSO) δ 7.85 – 7.79 (m, 2H), 7.34 – 7.27 (m, 5H), 7.23 – 7.22 (m, 2H), 4.63 (s, 2H), 4.56 (s, 2H). <sup>19</sup>F NMR (376 MHz, Chloroform-*d*) δ -134.8 – -135.3 (m), -146.4 (tt, *J* = 21.0, 6.6 Hz), -158.7 – -159.3 (m). <sup>13</sup>C NMR (101 MHz, DMSO) δ 73.7, 73.7, 49.5, 47.2, 41.7, 36.9, 36.2, 36.1, 36.0, 35.8, 35.6, 35.4, 35.2, 35.1, 35.0, 34.9, 34.8, 34.6. MS ESI- Found 470.38 (M-H<sup>+</sup>), 506.34 (M+Cl<sup>-</sup>) and 941.60 (2M-H<sup>+</sup>) ESI+ Found 494.18 (M+Na<sup>+</sup>)

**Compound 3C:** Yield: 88%. <sup>1</sup>H NMR (400 MHz, DMSO-*d*<sub>6</sub>) δ 12.94 (s, 1H), 7.84 – 7.74 (m, 2H), 7.33 – 7.26 (m, 2H), 7.26 – 7.18 (m, 2H), 7.07 (t, *J* = 8.9 Hz, 2H), 4.61 (s, 2H), 4.55 (s, 2H). <sup>19</sup>F NMR (376 MHz, DMSO-*d*<sub>6</sub>) δ -114.2 – -115.0 (m), -136.4 (d, *J* = 24.9 Hz), -147.2 (d, *J* = 22.9 Hz), -159.5 – -160.0 (m). <sup>13</sup>C NMR (101 MHz, DMSO) δ 167.4, 163.4, 161.0, 141.0, 132.9, 131.2, 131.1, 130.5, 129.7, 128.7, 115.7, 115.5, 72.7, 71.0, 66.8, 60.7, 52.3, 52.2, 44.1, 31.1. MS ESI- Found 488.24 (M - H<sup>+</sup>), 524.30 (M + Cl<sup>-</sup>).

**Compound 4C:** Yield: 89%. <sup>1</sup>H NMR (400 MHz, Acetonitrile-*d*<sub>3</sub>) δ 7.91 – 7.81 (m, 2H), 7.52 (d, *J* = 8.0 Hz, 2H), 7.36 (d, *J* = 8.0 Hz, 2H), 7.29 (d, *J* = 8.1 Hz, 2H), 4.64 (d, *J* = 4.7 Hz, 4H). <sup>19</sup>F NMR (376 MHz, Acetonitrile-*d*<sub>3</sub>) δ -63.2, -134.1 – -142.3 (m), -148.6 (tt, *J* = 20.3, 6.9 Hz), -158.7 – -165.1 (m). <sup>13</sup>C NMR (101 MHz, Acetonitrile-*d*<sub>3</sub>) δ 140.7, 140.0, 129.7, 129.5, 129.2, 128.6, 125.2, 125.2, 125.2, 52.6, 52.2. MS ESI- Found 538.32 (M - H<sup>+</sup>)

**Compound 5C:** Yield: 63%. <sup>1</sup>H NMR (400 MHz, DMSO) δ 7.90 (d, *J* = 7.8 Hz, 2H), 7.38 (d, *J* = 7.9 Hz, 2H), 7.23 – 6.90 (m, 2H), 6.65 (s, 2H), 4.68 (s, 2H), 4.44 (s, 2H), 2.99 (s, 6H). <sup>19</sup>F NMR (376 MHz, DMSO) δ -136.3 (d, *J* = 24.5 Hz), -148.0, -160.1 (t, *J* = 23.5 Hz). <sup>13</sup>C NMR (101 MHz, DMSO) δ 167.6, 150.2, 145.6, 143.0, 141.6, 139.2, 136.7, 130.6, 130.4, 129.9, 128.6, 122.9, 117.0, 113.0, 52.4, 52.3, 40.9, 30.0, 29.6. MS ESI+ Found 515.44 (M + H<sup>+</sup>).

**Compound 6C:** Yield: 86%. <sup>1</sup>H NMR (400 MHz, DMSO) δ 12.96 (s, 1H), 7.88 – 7.80 (m, 2H), 7.35 – 7.29 (m, 2H), 7.08 (q, *J* = 8.0 Hz, 4H), 4.62 (s, 2H), 4.50 (s, 2H), 2.24 (s, 3H). <sup>19</sup>F NMR (376 MHz, DMSO) δ -135.8 – -136.7 (m), -147.6 (tt, *J* = 22.5, 6.4 Hz), -159.6 – -160.3 (m). <sup>13</sup>C NMR (101 MHz, DMSO) δ 206.9, 167.4, 141.1, 137.7, 132.3, 130.5, 129.8, 129.3, 129.0, 128.6, 72.7, 71.0, 66.8, 60.7, 52.5, 52.2, 44.1, 31.2, 21.0. MS ESI- Found 484.36 (M - H<sup>+</sup>), 520.38 (M + Cl<sup>-</sup>) and 969.50 (2M - H<sup>+</sup>); ESI+ Found 486.19 (M + H<sup>+</sup>)

**Compound 7C:** Yield: 91%. <sup>1</sup>H NMR (400 MHz, DMSO) δ 12.91 (s, 1H), 7.82 (d, *J* = 7.8 Hz, 2H), 7.32 (d, *J* = 7.8 Hz, 2H), 7.20 (d, *J* = 8.0 Hz, 2H), 7.11 (d, *J* = 7.9 Hz, 2H), 4.68 (s, 2H), 4.48 (s, 2H), 1.20 (s, 9H). <sup>19</sup>F NMR (376 MHz, DMSO) δ -136.1 – -136.6 (m), -147.5 (tt, *J* = 22.4, 6.3 Hz), -159.9 (dq, *J* = 23.7, 10.7 Hz). <sup>13</sup>C NMR (101 MHz, DMSO) δ 167.4, 150.9, 141.3, 132.1, 130.5, 129.8, 128.9, 128.6, 125.4, 71.0,

52.7, 52.4, 34.6, 31.4. MS ESI- Found 526.52 (M - H<sup>+</sup>), 562.35 (M + Cl<sup>-</sup>) and 1053.74 (2M - H<sup>+</sup>); ESI+ Found 550.45 (M + Na<sup>+</sup>)

**Compound 8C:** Yield: 80%. <sup>1</sup>H NMR (400 MHz, DMSO) δ 8.76 – 8.53 (m, 2H), 7.91 – 7.72 (m, 2H), 7.50 (q, *J* = 2.8 Hz, 2H), 7.36 (d, *J* = 8.0 Hz, 2H), 4.81 (s, 2H), 4.67 (s, 2H). <sup>19</sup>F NMR (376 MHz, DMSO) δ -136.1 (dq, *J* = 18.3, 7.4, 6.2 Hz), -146.6 (tt, *J* = 22.0, 6.2 Hz), -159.1 – -159.9 (m). <sup>13</sup>C NMR (101 MHz, DMSO) δ 167.3, 151.6, 145.9, 140.1, 130.9, 129.8, 129.5, 124.6, 53.1, 52.2, 46.2. MS ESI- Found 471.29 (M - H<sup>+</sup>), 507.25 (M + Cl<sup>-</sup>) and 943.57 (2M - H<sup>+</sup>); ESI+ Found 473.28 (M + H<sup>+</sup>) 495.31 (M + Na<sup>+</sup>)

**Compound 9C:** Yield: 77%. <sup>1</sup>H NMR (400 MHz, Acetonitrile-*d*<sub>3</sub>) δ 9.57 (s, 5H), 8.61 – 8.42 (m, 2H), 7.89 – 7.78 (m, 2H), 7.79 – 7.64 (m, 3H), 7.37 – 7.26 (m, 2H), 4.78 (s, 2H), 4.58 (s, 2H). <sup>19</sup>F NMR (376 MHz, Acetonitrile-*d*<sub>3</sub>) δ -134.5 (ddt, *J* = 21.5, 12.7, 7.4 Hz), -137.6 – -138.1 (m), -148.0 (ddd, *J* = 27.5, 18.1, 8.5 Hz), -153.0 – -153.5 (m). <sup>13</sup>C NMR (101 MHz, Acetonitrile-*d*<sub>3</sub>) δ 149.1, 144.5, 140.1, 131.6, 128.8, 128.6, 122.8, 112.9, 112.9, 80.8, 52.0, 52.7, 51.0, 51.0. MS ESI- Found 453.25 (M + H<sup>+</sup>) and 489.21 (M + Cl<sup>-</sup>); ESI+ Found 455.27 (M + H<sup>+</sup>) and 477.23 (M + Na<sup>+</sup>)

**Compound 10C:** Yield: 81%. <sup>1</sup>H NMR (400 MHz, DMSO) δ 12.94 (s, 1H), 7.85 – 7.78 (m, 2H), 7.31 – 7.19 (m, 6H), 7.17 (dd, *J* = 7.4, 2.2 Hz, 2H), 4.56 (s, 2H), 4.50 (s, 2H). <sup>19</sup>F NMR (376 MHz, DMSO) δ -134.5 (ddd, *J* = 29.8, 13.1, 6.8 Hz), -136.6 – -137.1 (m), -147.7 (td, *J* = 21.8, 10.6 Hz), -152.1 – -152.6 (m). <sup>13</sup>C NMR (101 MHz, DMSO) δ 167.4, 141.3, 135.8, 135.5, 130.4, 129.7, 128.9, 128.8, 128.7, 128.65, 128.6, 128.2, 128.2, 128.1, 127.8, 113.2, 113.0, 52.4, 51.95, 50.9, 46.5. MS ESI- Found 452.34 (M - H<sup>+</sup>), 488.24 (M + Cl<sup>-</sup>); ESI+ Found 454.32 (M + H<sup>+</sup>), 476.28 (M + Na<sup>+</sup>)

**Compound 11C:** Yield: 93%. <sup>1</sup>H NMR (400 MHz, Acetonitrile-*d*<sub>3</sub>) δ 7.91 – 7.85 (m, 2H), 7.59 (dddd, *J* = 9.7, 8.2, 5.9, 2.5 Hz, 1H), 7.27 (d, *J* = 8.2 Hz, 2H), 7.21 – 7.13 (m, 2H), 7.01 – 6.94 (m, 2H), 4.54 (s, 2H), 4.47 (s, 2H). <sup>19</sup>F NMR (376 MHz, Acetonitrile-*d*<sub>3</sub>) δ -116.1 (td, *J* = 9.3, 4.7 Hz), -135.3 (ddt, *J* = 21.2, 13.8, 7.2 Hz), -138.2 – -138.5 (m), -149.18 (ddd, *J* = 27.5, 19.1, 8.2 Hz), -153.4 – -154.0 (m). <sup>13</sup>C NMR (101 MHz, Acetonitrile-*d*<sub>3</sub>) δ 141.3, 131.6, 130.8, 130.7, 130.4, 130.3, 129.7, 129.3, 128.4, 115.2, 115.2, 115.0, 114.9, 112.8, 112.6, 51.6, 51.6, 51.5, 49.9. MS ESI- Found 470.34 (M - H<sup>+</sup>), 941.67 (M + Cl<sup>-</sup>).

**Compound 12C:** Yield: 76%. <sup>1</sup>H NMR (400 MHz, Acetonitrile-*d*<sub>3</sub>) δ 7.87 (d, *J* = 8.0 Hz, 2H), 7.67 – 7.54 (m, 1H), 7.34 – 7.20 (m, 3H), 7.05 – 6.94 (m, 2H), 6.91 (dt, *J* = 9.9, 2.2 Hz, 1H), 4.57 (s, 2H), 4.51 (s, 2H). <sup>19</sup>F NMR (376 MHz, Acetonitrile-*d*<sub>3</sub>) δ -114.6 – -115.2 (m), -135.2 (ddt, *J* = 20.9, 13.8, 7.0 Hz), -137.8 – -139.0 (m), -149.2 (tt, *J* = 18.8, 8.4 Hz), -153.8 (t, *J* = 20.0 Hz). <sup>13</sup>C NMR (101 MHz, Acetonitrile-*d*<sub>3</sub>) δ 141.1, 130.4, 130.3, 129.6, 129.4, 128.5, 124.4, 115.3, 115.1, 114.6, 114.4, 51.9, 51.8. MS ESI- Found 470.22 (M - H<sup>+</sup>), 506.22 (M + Cl<sup>-</sup>).

**Compound 13C:** Yield: 65%. <sup>1</sup>H NMR (400 MHz, Acetonitrile-*d*<sub>3</sub>) δ 7.92 – 7.82 (m, 2H), 7.54 (dddd, *J* = 10.3, 8.2, 5.8, 2.5 Hz, 1H), 7.33 (d, *J* = 8.2 Hz, 2H), 7.30 – 7.18 (m, 2H), 7.07 (td, *J* = 7.5, 1.2 Hz, 1H), 6.94 (tt, *J* = 8.9, 1.2 Hz, 1H), 4.62 (s, 2H), 4.55 (s, 2H). <sup>19</sup>F NMR (376 MHz, Acetonitrile-*d*<sub>3</sub>) δ -118.6 (dt, *J* = 12.1, 6.4 Hz), -135.4 (ddt, *J* = 20.9, 13.6, 7.2 Hz), -138.0 – -139.4 (m), -149.0 – -150.0 (m), -153.8 – -154.5 (m). <sup>13</sup>C NMR (101 MHz, Acetonitrile-*d*<sub>3</sub>) δ 166.4, 141.5, 131.4, 131.3, 130.3, 130.2, 129.7, 129.3, 128.0, 124.4, 124.3, 52.1. MS ESI- Found 470.22 (M - H<sup>+</sup>), 506.22 (M + Cl<sup>-</sup>).

**Compound 14C:** Yield: 98%. <sup>1</sup>H NMR (400 MHz, DMSO-*d*<sub>6</sub>) δ 8.35 (d, *J* = 4.9 Hz, 1H), 7.86 (d, *J* = 7.9 Hz, 2H), 7.83 – 7.67 (m, 2H), 7.35 (d, *J* = 7.9 Hz, 2H), 7.27 (t, *J* = 9.0 Hz, 2H), 4.67 (s, 2H), 4.61 (s, 2H). <sup>19</sup>F NMR (376 MHz, DMSO-*d*<sub>6</sub>) δ -133.7 (ddt, *J* = 20.2, 13.8, 7.3 Hz), -137.3 (dt, *J* = 24.1, 11.6 Hz), -148.0 (tt, *J* = 21.2, 8.1 Hz), -153.1 (t, *J* = 21.9 Hz). <sup>13</sup>C NMR (101 MHz, DMSO-*d*<sub>6</sub>) δ 167.4, 162.8, 159.0, 158.7, 155.1, 148.5, 141.2, 138.2, 130.7, 129.9, 128.7, 123.6, 123.5, 118.0, 115.1, 113.2, 113.0, 52.3, 52.1, 36.2, 31.2. MS ESI- Found 489.21 (M+Cl<sup>-</sup>); ESI+ Found 455.22 (M+H<sup>+</sup>) and 477.19 (M + Na<sup>+</sup>)

**TO-317-C:** Yield: 88%. <sup>1</sup>H NMR (400 MHz, DMSO) δ 8.79 – 8.66 (m, 1H), 8.62 (d, *J* = 2.1 Hz, 1H), 8.27 – 8.15 (m, 1H), 7.99 – 7.85 (m, 1H), 7.88 – 7.71 (m, 3H), 7.31 (d, *J* = 8.0 Hz, 2H), 4.75 (s, 2H), 4.64 (s, 2H). <sup>19</sup>F NMR (376 MHz, DMSO) δ -133.9 (ddt, *J* = 20.7, 13.5, 7.0 Hz), -136.3 – -136.8 (m), -146.9 (tt, *J* = 22.0, 8.3 Hz), -151.8 (t, *J* = 22.1 Hz). <sup>13</sup>C NMR (101 MHz, DMSO-*d*<sub>6</sub>) δ 165.9, 150.8, 149.4, 145.3, 139.0, 136.7, 135.1, 132.4, 130.6, 129.9, 129.3, 128.5, 124.1, 112.8, 112.6, 112.4, 112.1, 51.4, 51.1, 51.0, 49.4, 49.3. MS ESI- Found 453.38 (ESI - H<sup>+</sup>), 489.34 (M + Cl<sup>-</sup>) and 907.54 (2M - H<sup>+</sup>); ESI+ Found 455.17 (M + H<sup>+</sup>).

### **Product D: O-(Tetrahydro-2H-pyran-2-yl) Protected Hydroxamate Esters:**

**Compound 2D:** Yield: 73%. <sup>1</sup>H NMR (400 MHz, Chloroform-*d*) δ 9.41 (s, 1H), 7.73 – 7.65 (m, 2H), 7.22 (ddd, *J* = 5.0, 3.8, 2.0 Hz, 5H), 7.11 – 7.04 (m, 2H), 5.07 (t, *J* = 2.9 Hz, 1H), 4.57 (s, 2H), 4.43 (s, 2H), 4.03 (td, *J* = 10.4, 9.3, 2.8 Hz, 1H), 3.68 – 3.58 (m, 1H), 1.84 (tt, *J* = 10.1, 6.4 Hz, 3H), 1.62 – 1.52 (m, 3H). <sup>19</sup>F NMR (376 MHz, Chloroform-*d*) δ -134.6 – -135.8 (m), -146.0 (tt, *J* = 21.1, 6.5 Hz), -158.3 – -159.5 (m). <sup>13</sup>C NMR (101 MHz, Chloroform-*d*) δ 139.2, 134.0, 131.8, 128.7, 128.6, 128.5, 128.4, 127.7, 102.7, 62.6, 51.7, 51.6, 28.1, 25.0, 18.6. MS ESI- Found 569.45 (M - H<sup>+</sup>), 605.47 (M + Cl<sup>-</sup>), 1139.79 (2M - H<sup>+</sup>), 1175.75 (2M + Cl<sup>-</sup>); ESI+ Found 593.44 (M + Na<sup>+</sup>), 1163.72 (2M + Na<sup>+</sup>).

**Compound 3D:** Yield: 82%. <sup>1</sup>H NMR (400 MHz, Acetonitrile-*d*<sub>3</sub>) δ 10.08 (s, 1H), 7.67 – 7.56 (m, 2H), 7.29 – 7.23 (m, 2H), 7.22 – 7.16 (m, 2H), 7.03 – 6.90 (m, 2H), 5.07 – 5.00 (m, 1H), 4.58 (s, 2H), 4.51 (s, 2H), 4.14 – 4.01 (m, 1H), 3.59 (dtd, *J* = 11.4, 3.9, 1.9 Hz, 1H), 1.84 – 1.73 (m, 3H), 1.67 – 1.50 (m, 4H). <sup>19</sup>F NMR (376 MHz, Acetonitrile-*d*<sub>3</sub>) δ -115.3 – -116.3 (m), -136.8 – -137.7 (m), -148.6 (tt, *J* = 20.2, 6.9 Hz), -160.6 – -161.8 (m). <sup>13</sup>C NMR (101 MHz, Acetonitrile-*d*<sub>3</sub>) δ 139.5, 131.8, 131.3, 130.8, 130.7, 128.4, 127.3, 115.2, 115.0, 101.9, 61.8, 51.9, 51.7, 27.9, 24.9, 18.3. MS: ESI- Found 587.52 (M - H<sup>+</sup>), 623.55 (M + Cl<sup>-</sup>), 1176.82 (2M - H<sup>+</sup>); ESI+ Found 611.45 (M + Na<sup>+</sup>).

**Compound 4D:** Yield: 77%. <sup>1</sup>H NMR (400 MHz, Chloroform-*d*) δ 9.62 (s, 1H), 7.67 – 7.59 (m, 2H), 7.44 (d, *J* = 8.1 Hz, 2H), 7.21 (s, 2H), 7.18 – 7.10 (m, 2H), 5.03 (t, *J* = 2.9 Hz, 1H), 4.53 (s, 2H), 4.49 (s, 2H), 4.00 (td, *J* = 10.1, 8.5, 2.4 Hz, 1H), 3.66 – 3.53 (m, 1H), 1.85 – 1.71 (m, 3H), 1.66 – 1.45 (m, 4H). <sup>19</sup>F NMR (376 MHz, Chloroform-*d*) δ -62.9, -132.7 – -141.4 (m), -145.4 (tt, *J* = 20.9, 6.5 Hz), -156.4 – -162.8 (m). <sup>13</sup>C NMR (101 MHz, Chloroform-*d*) δ 145.6, 142.6, 138.6, 138.5, 132.0, 128.8, 128.5, 127.7, 125.5, 125.5, 125.5, 102.7, 62.6, 60.4, 52.0, 51.5, 28.0, 25.0, 18.6, 14.1. MS ESI- Found 637.54 (M - H<sup>+</sup>), 673.61 (M + Cl<sup>-</sup>), 1276 (2M - H<sup>+</sup>); ESI+ Found 661.47 (M + H<sup>+</sup>).

**Compound 5D:** Yield: 69%. <sup>1</sup>H NMR (400 MHz, CD<sub>3</sub>CN) δ 9.85 (s, 1H), 7.73 – 7.64 (m, 2H), 7.36 – 7.29 (m, 2H), 7.03 – 6.95 (m, 2H), 6.62 – 6.53 (m, 2H), 5.05 (t, *J* = 2.8 Hz, 1H), 4.63 (s, 2H), 4.39 (s, 2H), 3.61 (dtd, *J* = 11.4, 3.9, 2.0 Hz, 1H), 2.88 (s, 6H), 1.81 (h, *J* = 3.8 Hz, 3H), 1.71 – 1.53 (m, 4H). <sup>19</sup>F NMR (376 MHz, CD<sub>3</sub>CN) δ -136.9 – -137.4 (m), -149.7 (tt, *J* = 20.4, 6.6 Hz), -161.3 – -161.9 (m). <sup>13</sup>C NMR (101 MHz, CD<sub>3</sub>CN) δ 150.6, 140.2, 131.8, 129.9, 128.2, 127.4, 121.5, 117.3, 112.0, 101.9, 61.8, 60.0, 51.8 (d, *J* = 5.9 Hz), 39.6, 28.0, 24.9, 18.4, 13.5. MS ESI+ Found 614.43 (M + H<sup>+</sup>), 636.43 (M + Na<sup>+</sup>), 1249.51 (2M + Na<sup>+</sup>); ESI- Found 612.43 (M - H<sup>+</sup>), 648.43 (M + Cl<sup>-</sup>).

**Compound 6D:** Yield: 81%. <sup>1</sup>H NMR (400 MHz, CD<sub>3</sub>CN) δ 10.03 (s, 1H), 7.70 – 7.63 (m, 2H), 7.28 (d, *J* = 8.2 Hz, 2H), 7.06 (s, 4H), 5.05 (t, *J* = 2.9 Hz, 1H), 4.60 (s, 2H), 4.47 (s, 2H), 3.59 (ddd, *J* = 11.0, 4.2, 2.7 Hz, 1H), 2.28 (s, 3H), 1.88 – 1.72 (m, 3H), 1.70 – 1.47 (m, 3H). <sup>19</sup>F NMR (376 MHz, CD<sub>3</sub>CN) δ -136.4 – -138.1 (m), -149.0 (tt, *J* = 20.6, 6.5 Hz), -160.8 – -162.1 (m). <sup>13</sup>C NMR (101 MHz, CD<sub>3</sub>CN) δ 164.8, 143.3, 139.7, 139.3, 138.0, 136.8, 131.9, 131.8, 129.0, 128.7, 128.3, 127.4, 117.3, 101.9, 61.8, 60.0, 52.0, 51.8, 28.0, 25.0, 20.2, 20.1, 18.4, 13.6. MS ESI+ Found 607.36 (M + Na<sup>+</sup>), 1191.43 (2M + Na<sup>+</sup>); ESI- Found 583.36 (M - H<sup>+</sup>), 619.39 (M + Cl<sup>-</sup>), 1167.63 (2M - H<sup>+</sup>).

**Compound 7D:** Yield: 65%. <sup>1</sup>H NMR (400 MHz, CDCl<sub>3</sub>) δ 9.22 (s, 1H), 7.72 (s, 1H), 7.69 – 7.61 (m, 2H), 7.24 – 7.16 (m, 2H), 7.03 (d, *J* = 8.0 Hz, 2H), 6.97 (d, *J* = 8.0 Hz, 2H), 4.99 (dd, *J* = 5.5, 2.8 Hz, 1H), 3.90 (ddd, *J* = 11.1, 7.6, 3.1 Hz, 1H), 3.61 – 3.52 (m, 1H), 1.80 – 1.65 (m, 3H), 1.61 – 1.47 (m, 4H), 1.28 (s, 9H). <sup>19</sup>F NMR (376 MHz, CDCl<sub>3</sub>) δ -135.0 (qd, *J* = 13.2, 7.5 Hz), -146.2 (tt, *J* = 21.1, 6.4 Hz), -158.9 (tt, *J* = 20.7, 6.3 Hz). <sup>13</sup>C NMR (101 MHz, CDCl<sub>3</sub>) δ 165.7, 154.9, 151.7, 151.2, 142.6, 140.1, 139.6, 135.1, 131.8, 129.3, 128.6, 125.5, 103.1, 63.5, 60.4, 51.3, 50.9, 43.0, 43.0, 42.9, 34.7, 31.3, 29.3, 28.8, 25.1, 25.1, 21.5, 21.1, 18.7, 14.2. MS: ESI- Found 633.47 (M - H<sup>+</sup>); ESI+ Found 657.12 (M + Na<sup>+</sup>).

**Compound 8D:** Yield: 77%. <sup>1</sup>H NMR (400 MHz, CD<sub>3</sub>CN) δ 9.95 (s, 1H), 8.44 – 8.36 (m, 2H), 7.66 – 7.55 (m, 2H), 7.28 (dd, *J* = 8.4, 2.5 Hz, 2H), 7.19 – 7.08 (m, 2H), 5.04 (t, *J* = 2.9 Hz, 1H), 4.57 (dd, *J* = 13.5, 4.5 Hz, 4H), 3.64 – 3.50 (m, 1H), 1.79 (h, *J* = 4.8, 3.6 Hz, 3H), 1.71 – 1.48 (m, 4H). <sup>19</sup>F NMR (376 MHz, CD<sub>3</sub>CN) δ -136.7 – -137.3 (m), -148.3 (tt, *J* = 20.3, 6.8 Hz), -160.7 – -161.2 (m). <sup>13</sup>C NMR (101 MHz, CD<sub>3</sub>CN) δ 149.6, 128.8, 127.3, 123.0, 117.3, 101.9, 61.8, 52.5, 51.6, 28.0, 24.9, 18.4. MS ESI- Found

570.64 (M - H<sup>+</sup>), 606.67 (M + Cl<sup>-</sup>), 1141.85 (2M - H<sup>+</sup>) and 1177.75 (2M + Cl<sup>-</sup>); ESI<sup>+</sup> Found 572.53 (M + H<sup>+</sup>), 594.47 (ESI + Na<sup>+</sup>) and 1165.71 (2M + Na<sup>+</sup>)

**Compound 9D:** Yield: 70%. <sup>1</sup>H NMR (400 MHz, Acetonitrile-*d*<sub>3</sub>) δ 9.78 (s, 1H), 8.46 – 8.41 (m, 2H), 7.66 – 7.57 (m, 3H), 7.30 – 7.22 (m, 2H), 7.15 – 7.08 (m, 2H), 5.04 (d, *J* = 3.3 Hz, 1H), 4.54 (s, 2H), 4.52 (s, 2H), 3.63 – 3.57 (m, 1H), 3.49 – 3.41 (m, 1H), 1.80 (t, *J* = 2.3 Hz, 3H), 1.64 (q, *J* = 4.6 Hz, 4H). <sup>19</sup>F NMR (376 MHz, Acetonitrile-*d*<sub>3</sub>) δ -135.0 (ddt, *J* = 21.1, 14.2, 6.9 Hz), -138.1 (dddd, *J* = 23.0, 13.1, 9.4, 4.1 Hz), -148.6 – -149.2 (m), -153.6 (tt, *J* = 18.2, 3.3 Hz). <sup>13</sup>C NMR (101 MHz, Acetonitrile-*d*<sub>3</sub>) δ 149.8, 128.8, 127.3, 122.9, 101.9, 61.8, 60.0, 52.1, 51.2, 27.9, 24.9, 18.3, 13.5. MS ESI<sup>-</sup> Found 552.40 (M - H<sup>+</sup>), 588.43 (M + Cl<sup>-</sup>); ESI<sup>+</sup> Found 554.49 (M + H<sup>+</sup>), 576.49 (M + Na<sup>+</sup>)

**Compound 10D:** Yield: 64%. <sup>1</sup>H NMR (400 MHz, Acetonitrile-*d*<sub>3</sub>) δ 7.68 – 7.61 (m, 2H), 7.57 (dddd, *J* = 9.6, 8.2, 5.9, 2.5 Hz, 1H), 7.31 – 7.22 (m, 5H), 7.21 – 7.11 (m, 2H), 5.05 (t, *J* = 2.9 Hz, 1H), 4.55 (s, 2H), 4.49 (s, 2H), 3.61 (dtd, *J* = 11.4, 3.9, 1.8 Hz, 1H), 3.54 – 3.42 (m, 1H), 2.74 (s, 1H), 1.85 – 1.76 (m, 3H), 1.68 – 1.59 (m, 4H). <sup>19</sup>F NMR (376 MHz, Acetonitrile-*d*<sub>3</sub>) δ -135.4 (ddt, *J* = 20.5, 13.5, 7.2 Hz), -138.0 – -138.8 (m), -149.0 – -149.7 (m), -153.9 (ddd, *J* = 21.5, 18.4, 3.3 Hz). <sup>13</sup>C NMR (101 MHz, Acetonitrile-*d*<sub>3</sub>) δ 139.8, 135.3, 131.8, 128.6, 128.5, 128.4, 127.9, 127.3, 112.7, 112.5, 102.3, 101.8, 61.8, 61.79, 51.9, 51.9, 51.4, 51.4, 28.8, 28.0, 25.3, 25.2, 24.9, 19.6, 18.4, 13.5.

**Compound 11D:** Yield: 79%. <sup>1</sup>H NMR (400 MHz, Chloroform-*d*) δ 8.97 (s, 1H), 7.74 – 7.62 (m, 2H), 7.55 (dddd, *J* = 10.1, 8.1, 5.7, 2.5 Hz, 1H), 7.25 – 7.15 (m, 2H), 7.10 – 7.01 (m, 2H), 7.01 – 6.88 (m, 2H), 5.10 (t, *J* = 3.0 Hz, 1H), 4.49 (s, 2H), 4.39 (s, 2H), 4.03 (ddd, *J* = 11.3, 9.6, 2.9 Hz, 1H), 3.68 (dtd, *J* = 11.0, 4.0, 1.7 Hz, 1H), 1.97 – 1.79 (m, 3H), 1.65 (tdd, *J* = 12.6, 10.9, 9.9, 4.4 Hz, 4H). <sup>19</sup>F NMR (376 MHz, Chloroform-*d*) δ -113.2 (tt, *J* = 9.0, 5.0 Hz), -133.5 (ddt, *J* = 21.5, 13.8, 7.0 Hz), -134.8 – -135.4 (m), -145.7 (tt, *J* = 20.5, 8.2 Hz), -150.5 – -151.1 (m). <sup>13</sup>C NMR (101 MHz, Chloroform-*d*) δ 139.2, 131.9, 130.4, 130.3, 130.2, 128.5, 127.6, 115.8, 115.6, 112.5, 112.3, 102.8, 62.7, 50.9, 50.7, 28.1, 25.0, 18.6. MS ESI<sup>-</sup> Found 569.42, 605.39 (M + Cl<sup>-</sup>); ESI<sup>+</sup> Found 571.33 (M + H<sup>+</sup>), 593.38 (M + Na<sup>+</sup>).

**Compound 12D:** Yield: 87%. <sup>1</sup>H NMR (400 MHz, Acetonitrile-*d*<sub>3</sub>) δ 9.77 (s, 1H), 7.66 – 7.59 (m, 2H), 7.27 (t, *J* = 7.7 Hz, 3H), 6.99 (t, *J* = 8.1 Hz, 2H), 6.92 (d, *J* = 9.9 Hz, 1H), 5.04 (s, 1H), 4.51 (dd, *J* = 17.9, 12.3 Hz, 4H), 3.03 (d, *J* = 2.7 Hz, 1H), 1.80 (d, *J* = 3.2 Hz, 3H), 1.68 – 1.58 (m, 4H). <sup>19</sup>F NMR (376 MHz, Acetonitrile-*d*<sub>3</sub>) δ -114.4 – -115.2 (m), -135.2 (ddt, *J* = 21.4, 14.1, 7.5 Hz), -138.3 (dddd, *J* = 22.8, 13.1, 9.8, 4.0 Hz), -148.6 – -149.5 (m), -153.4 – -154.1 (m). <sup>13</sup>C NMR (101 MHz, Acetonitrile-*d*<sub>3</sub>) δ 130.4, 130.3, 128.5, 127.3, 124.4, 124.4, 114.6, 101.9, 61.8, 60.0, 51.8, 51.6, 27.9, 24.9, 18.3, 13.5. MS ESI<sup>-</sup> Found 569.40 (M - H<sup>+</sup>), 605.37 (M + Cl<sup>-</sup>); 593.49 (M + Na<sup>+</sup>).

**Compound 13D:** Yield: 86%. <sup>1</sup>H NMR (400 MHz, Acetonitrile-*d*<sub>3</sub>) δ 9.78 (s, 1H), 5.05 (s, 1H), 4.60 (s, 2H), 4.54 (s, 2H), 3.65 – 3.58 (m, 1H), 3.02 (t, *J* = 2.6 Hz, 1H), 1.81 (d, *J* = 3.1 Hz, 3H), 1.63 (s, 4H). <sup>19</sup>F NMR (376 MHz, Acetonitrile-*d*<sub>3</sub>) δ -118.2 – -119.2 (m), -135.4 (ddt, *J* = 20.6, 13.9, 7.0 Hz), -138.0 – -138.8 (m), -149.32 (ddd, *J* = 27.9, 18.6, 8.4 Hz), -153.79 – -154.37 (m). <sup>13</sup>C NMR (101 MHz, Acetonitrile-*d*<sub>3</sub>) δ 140.0, 131.4, 131.3, 130.3, 130.2, 128.1, 127.3, 124.4, 124.3, 115.2, 115.0, 112.7, 112.5, 101.9, 61.8, 60.0, 52.0, 27.9, 24.9, 20.2, 18.3, 13.5. MS ESI<sup>-</sup> Found 569.40 (M - H<sup>+</sup>), 605.37 (M + Cl<sup>-</sup>); 593.49 (M + Na<sup>+</sup>).

**Compound 14D:** Yield: 54%. <sup>1</sup>H NMR (400 MHz, Acetonitrile-*d*<sub>3</sub>) δ 10.04 (s, 1H), 8.38 – 8.27 (m, 1H), 7.69 (d, *J* = 8.1 Hz, 2H), 7.60 (dtd, *J* = 17.0, 8.0, 2.2 Hz, 2H), 7.32 (d, *J* = 8.0 Hz, 2H), 7.21 – 7.08 (m, 2H), 5.05 (t, *J* = 2.8 Hz, 1H), 4.66 (s, 2H), 4.53 (s, 2H), 4.15 – 4.01 (m, 1H), 3.82 (dtd, *J* = 11.3, 8.0, 4.2 Hz, 1H), 3.65 – 3.40 (m, 2H), 1.78 (q, *J* = 8.2, 5.7 Hz, 3H), 1.62 (qt, *J* = 14.1, 10.3, 5.0 Hz, 4H). <sup>19</sup>F NMR (376 MHz, Acetonitrile-*d*<sub>3</sub>) δ -134.4 (ddt, *J* = 20.6, 13.6, 7.0 Hz), -138.2 – -139.6 (m), -149.2 – -150.9 (m), -153.9 – -156.4 (m). <sup>13</sup>C NMR (101 MHz, Acetonitrile-*d*<sub>3</sub>) δ 155.1, 149.1, 139.8, 136.7, 131.9, 128.4, 127.4, 125.5, 125.3, 122.9, 122.8, 117.4, 112.6, 112.6, 112.4, 112.4, 102.2, 101.9, 61.8, 61.8, 52.1, 51.6, 51.5, 28.8, 28.0, 25.2, 24.9, 19.7, 19.5, 18.4. ESI<sup>-</sup> Found 552.27 (M - H<sup>+</sup>), 588.30 (M + Cl<sup>-</sup>); ESI<sup>+</sup> Found 554.40 (M + H<sup>+</sup>), 576.39 (M + Na<sup>+</sup>).

**Compound TO-317-D:** Yield: 63%. <sup>1</sup>H NMR (400 MHz, CD<sub>3</sub>CN) δ 10.23 (s, 1H), 8.39 (dd, *J* = 4.8, 1.6 Hz, 1H), 8.30 (dd, *J* = 2.3, 0.9 Hz, 1H), 7.70 – 7.57 (m, 3H), 7.57 – 7.49 (m, 1H), 7.28 – 7.21 (m, 2H), 7.19 (ddd, *J* = 7.9, 4.8, 0.9 Hz, 1H), 5.05 (t, *J* = 2.9 Hz, 1H), 4.53 (s, 2H), 4.49 (s, 2H), 3.66 – 3.46 (m, 1H), 1.86 – 1.70 (m, 3H), 1.71 – 1.49 (m, 4H). <sup>19</sup>F NMR (376 MHz, CD<sub>3</sub>CN) δ -134.8 – -135.3 (m), -137.7 – -138.2 (m), -148.7 (tt, *J* = 20.0, 8.1 Hz), -153.5 (ddt, *J* = 21.5, 18.5, 3.2 Hz). <sup>13</sup>C NMR (101 MHz, CD<sub>3</sub>CN) δ

164.6, 149.5, 148.9, 139.5, 136.3, 131.9, 131.5, 128.5, 127.4, 123.4, 117.3, 112.7, 101.9, 61.8, 60.0, 52.0, 49.9, 49.8, 28.0, 24.9, 20.2, 18.4, 13.6. MS ESI- Found 552.48 (M - H<sup>+</sup>), 588.52 (M + Cl<sup>-</sup>), 1105.60 (2M - H<sup>+</sup>) and 1141.64 (2M + Cl<sup>-</sup>); ESI+ Found 554.51 (M + H<sup>+</sup>), 579.57 (M + Na<sup>+</sup>), 1107.77 (2M + H<sup>+</sup>) and 1129.74 (2M + Na<sup>+</sup>).

### **Final Compounds: Hydroxamic Acids**

The proton (<sup>1</sup>H), fluorine (<sup>19</sup>F), and carbon\* (<sup>13</sup>C) NMR spectra of final compounds are shown below.

Only compound peaks are shown in the following NMR reports. This is achieved by selecting the compound peak processing function using MestReNovas' advanced analysis under <sup>1</sup>H spectrum.

Some rotamer peaks are observed in the <sup>1</sup>H spectra of some compounds and are not integrated for consistency in their multiplet analysis.

Final <sup>13</sup>C spectra peaks have not been assigned integral labels, and the auto multiplet analysis function in MestReNova has been used to generate their multiplet reports.

High-Res Mass Spectras are provided as recorded from the AIMS facility at the University of Toronto and reported below to 4 decimal places.

Analytical HPLC traces are provided and the purity of the final compounds as calculated by the Hewlett Packard 1100 series analytical HPLC are indicated on the spectras.

### **4-(((N-benzyl-2,3,4,5,6-pentafluorophenyl) sulfonamido)methyl)-N-hydroxybenzamide: Yield: 48%.**

#### **Compound 2**

C<sub>21</sub>H<sub>15</sub>F<sub>5</sub>N<sub>2</sub>O<sub>4</sub>S

Exact Mass: 486.07

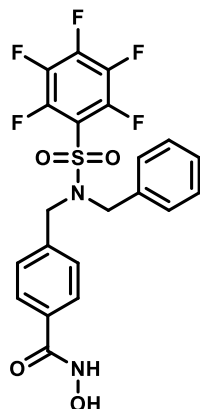

<sup>1</sup>H NMR (400 MHz, DMSO) δ 11.22 (s, 1H), 9.07 (s, 1H), 7.65 (d, *J* = 8.0 Hz, 2H), 7.35 – 7.13 (m, 7H), 4.58 (s, 2H), 4.55 (s, 2H).

<sup>19</sup>F NMR (376 MHz, DMSO) δ -136.4 (dt, *J* = 22.3, 4.9 Hz), -146.7 – -147.8 (m), -159.3 – -160.1 (m).

<sup>13</sup>C NMR (101 MHz, DMSO) δ 164.2, 160.1, 145.6, 139.2, 136.6, 135.6, 135.5, 132.5, 129.0, 128.9, 128.8, 128.8, 128.7, 128.5, 128.3, 128.3, 127.3, 125.4, 52.7, 52.5, 52.3.

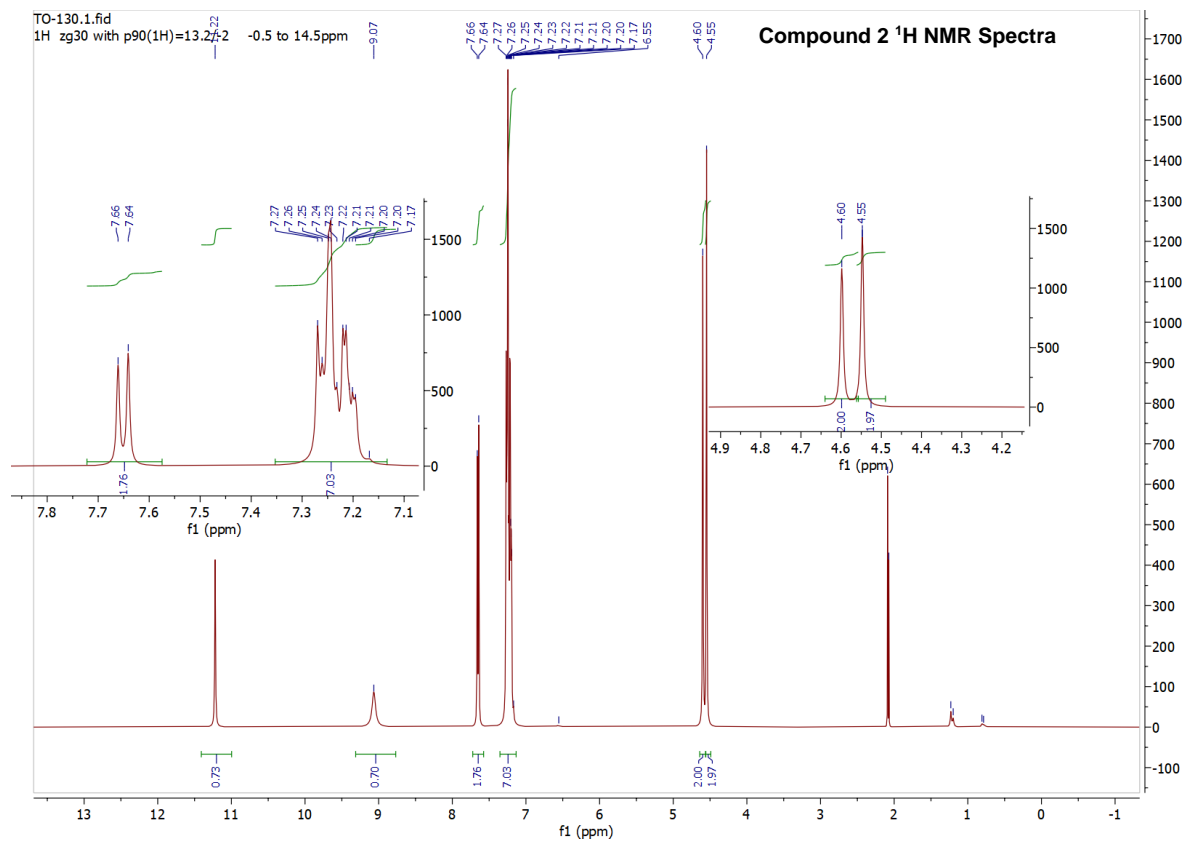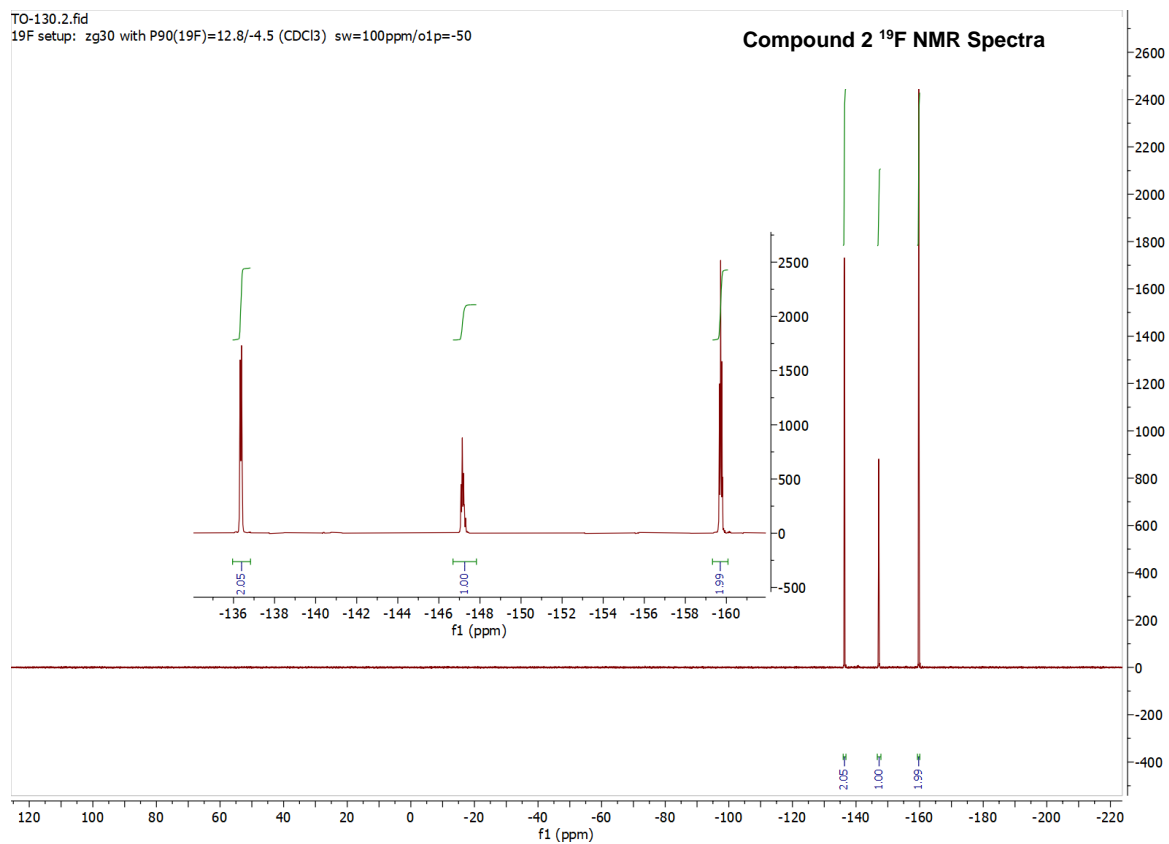

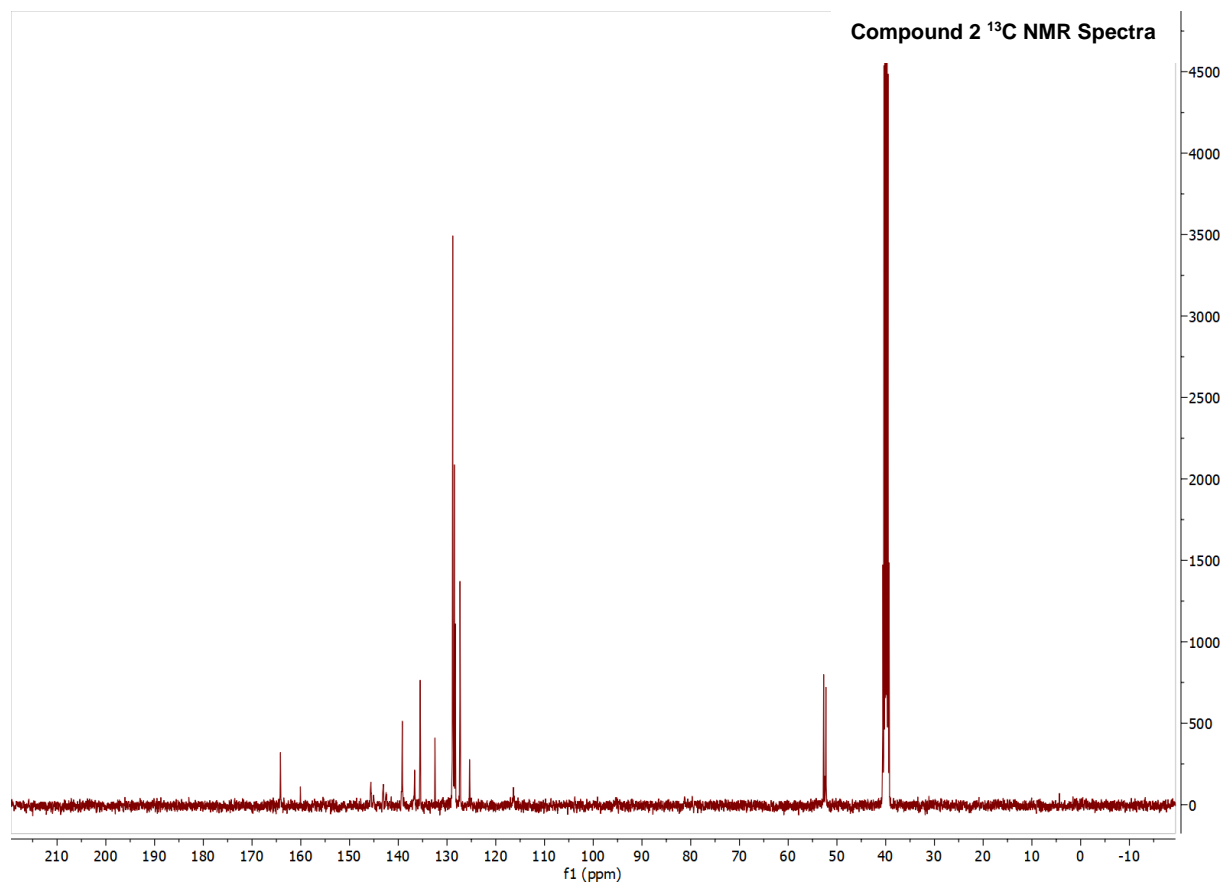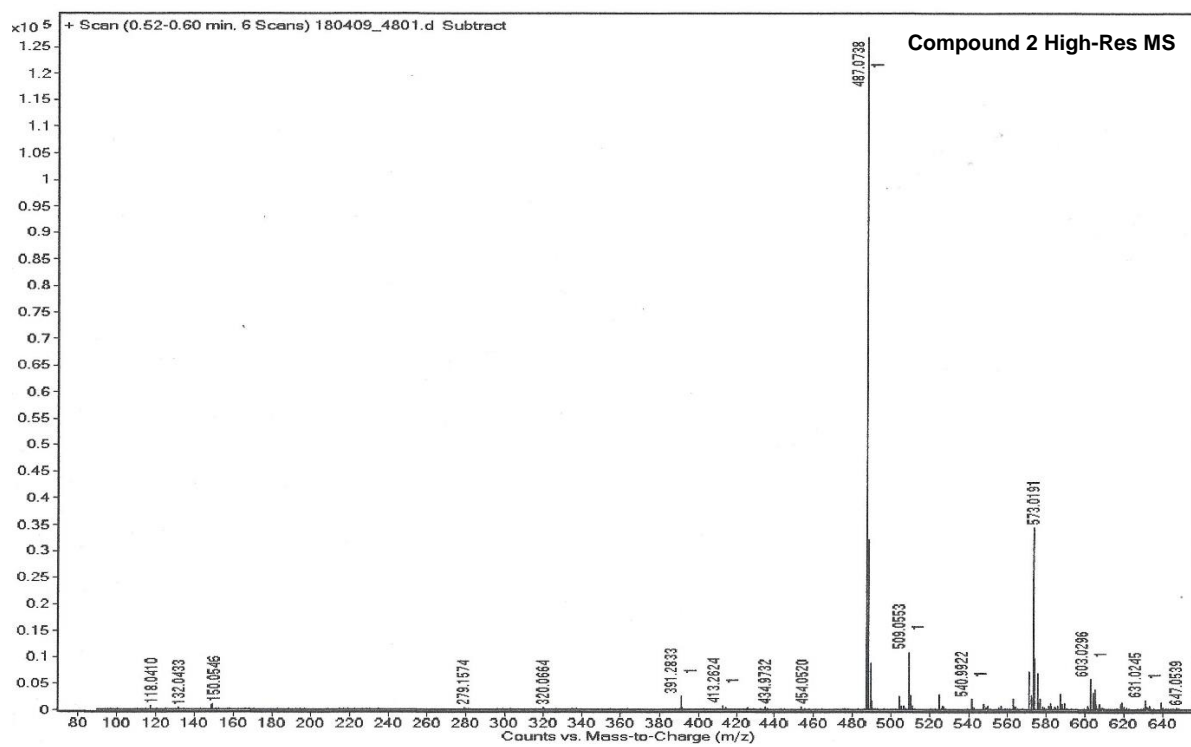



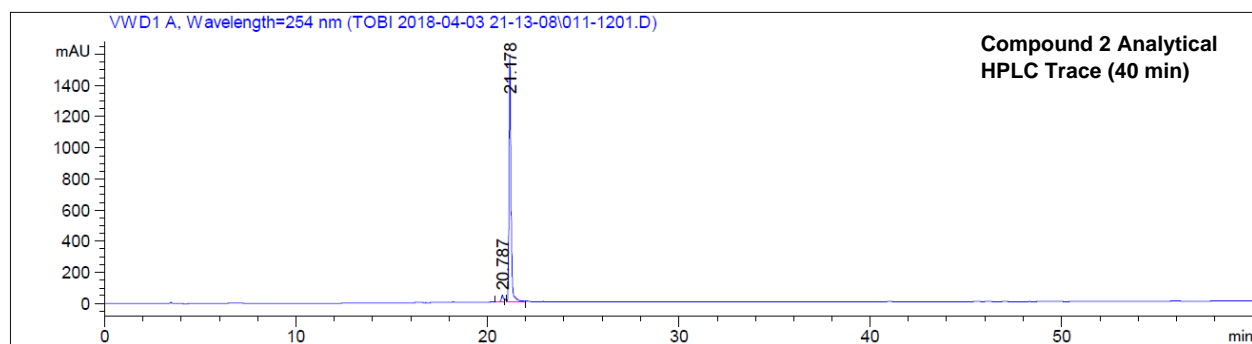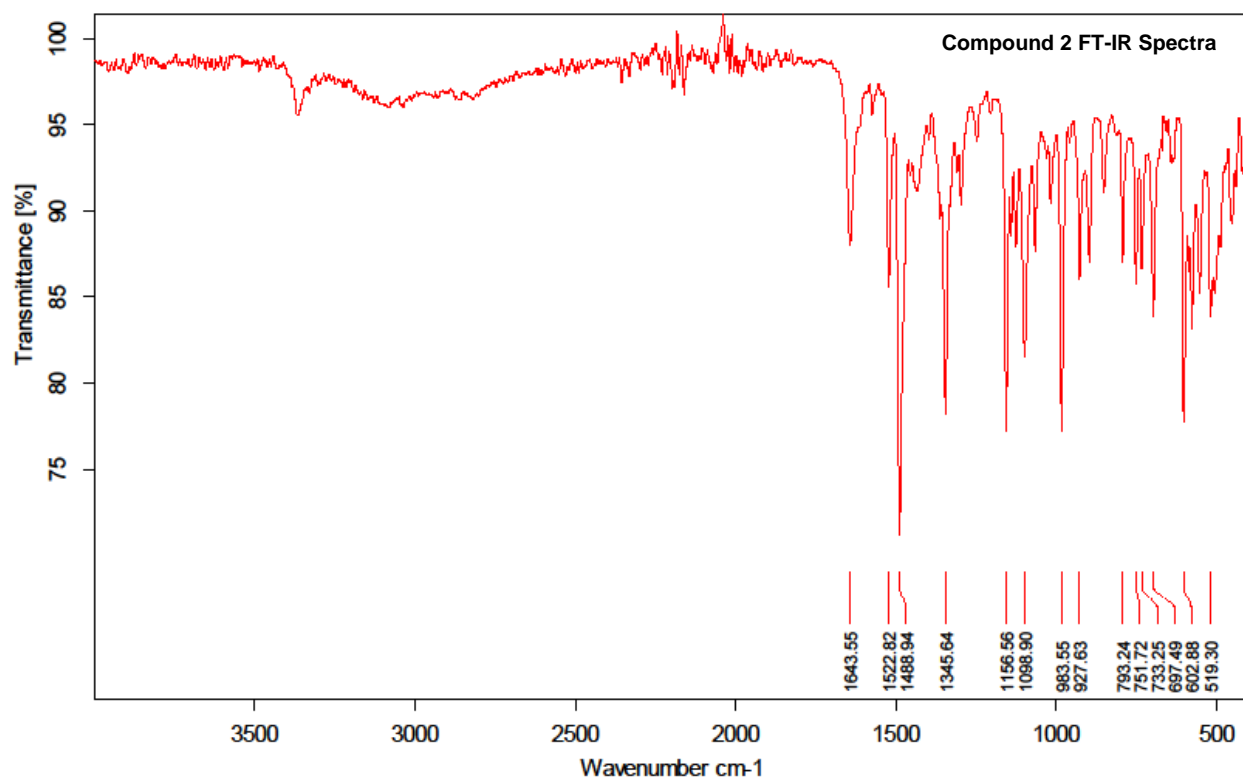

**N-hydroxy-4-(((2,3,4,5,6-pentafluoro-N-(4-fluorobenzyl)phenyl)sulfonamido)methyl)benzamide**  
Yield: 53%

**Compound 3**

C<sub>21</sub>H<sub>14</sub>F<sub>6</sub>N<sub>2</sub>O<sub>4</sub>S

Exact Mass: 504.06

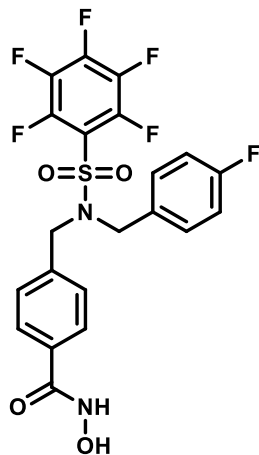

<sup>1</sup>H NMR (400 MHz, DMSO) δ 11.19 (s, 1H), 9.04 (s, 1H), 7.64 (d, *J* = 7.8 Hz, 2H), 7.24 (dt, *J* = 9.0, 2.8 Hz, 4H), 7.08 (t, *J* = 8.8 Hz, 2H), 4.57 (d, *J* = 16.3 Hz, 4H).

<sup>19</sup>F NMR (376 MHz, DMSO) δ -114.5 (tq, *J* = 12.8, 7.0, 6.1 Hz), -136.4 (dt, *J* = 23.3, 5.1 Hz), -147.1 (tt, *J* = 22.7, 6.5 Hz), -159.7 (tt, *J* = 22.6, 5.8 Hz).

<sup>13</sup>C NMR (101 MHz, DMSO) δ 164.3, 145.8, 139.3, 136.9, 132.1, 131.2, 128.7, 128.6, 127.5, 127.4, 116.4, 115.9, 115.8, 115.7, 115.6, 52.4, 52.3, 40.8, 40.6, 40.4.

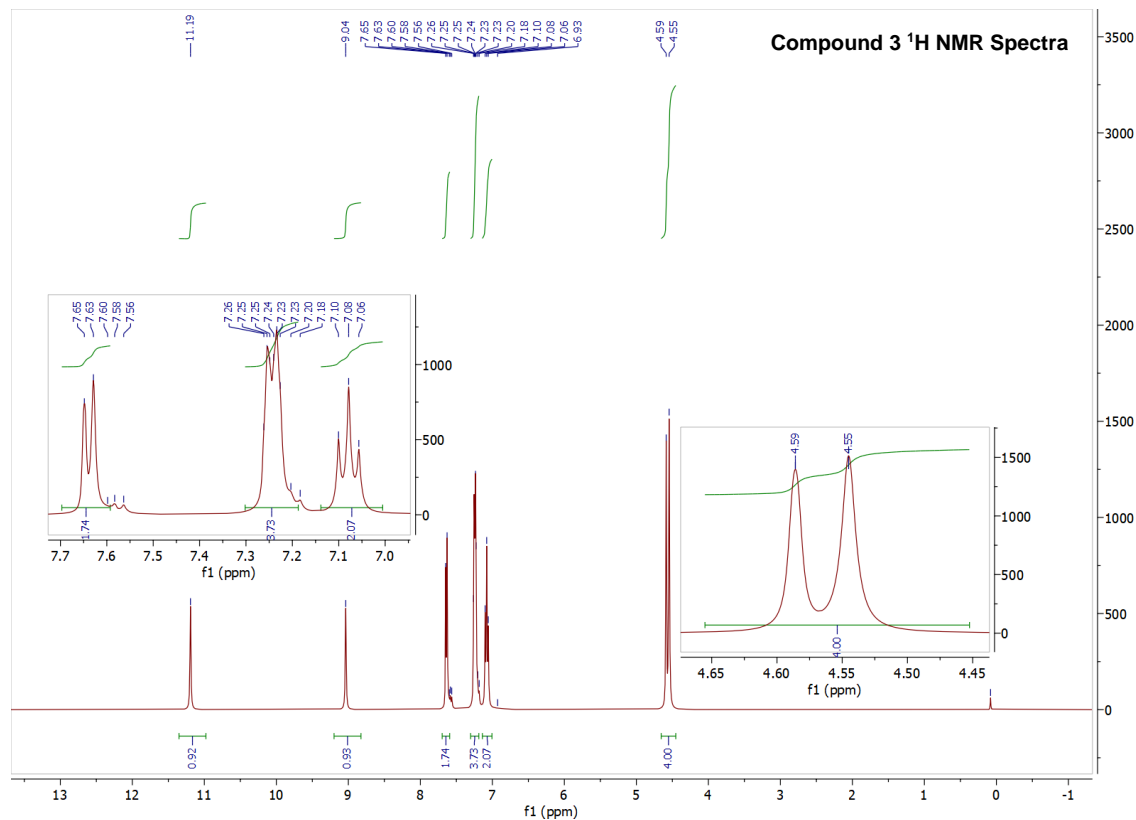

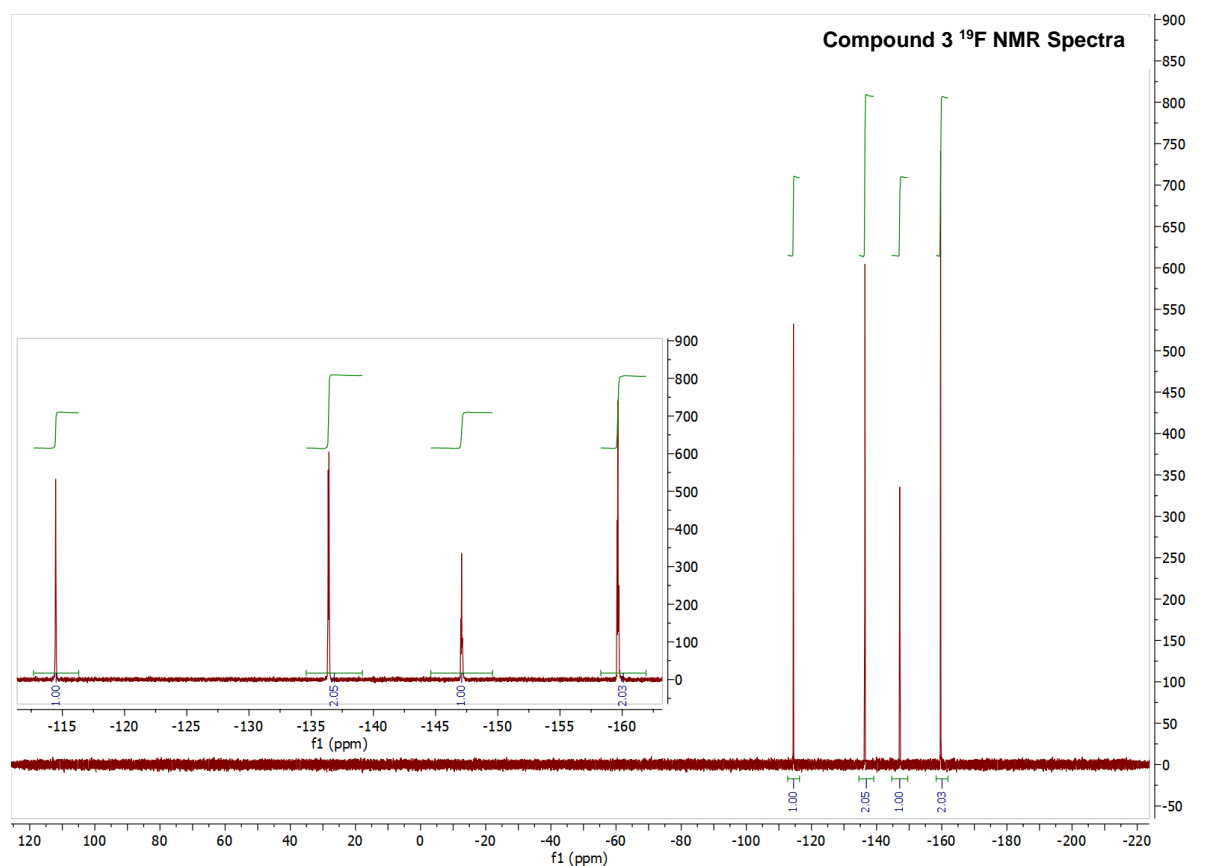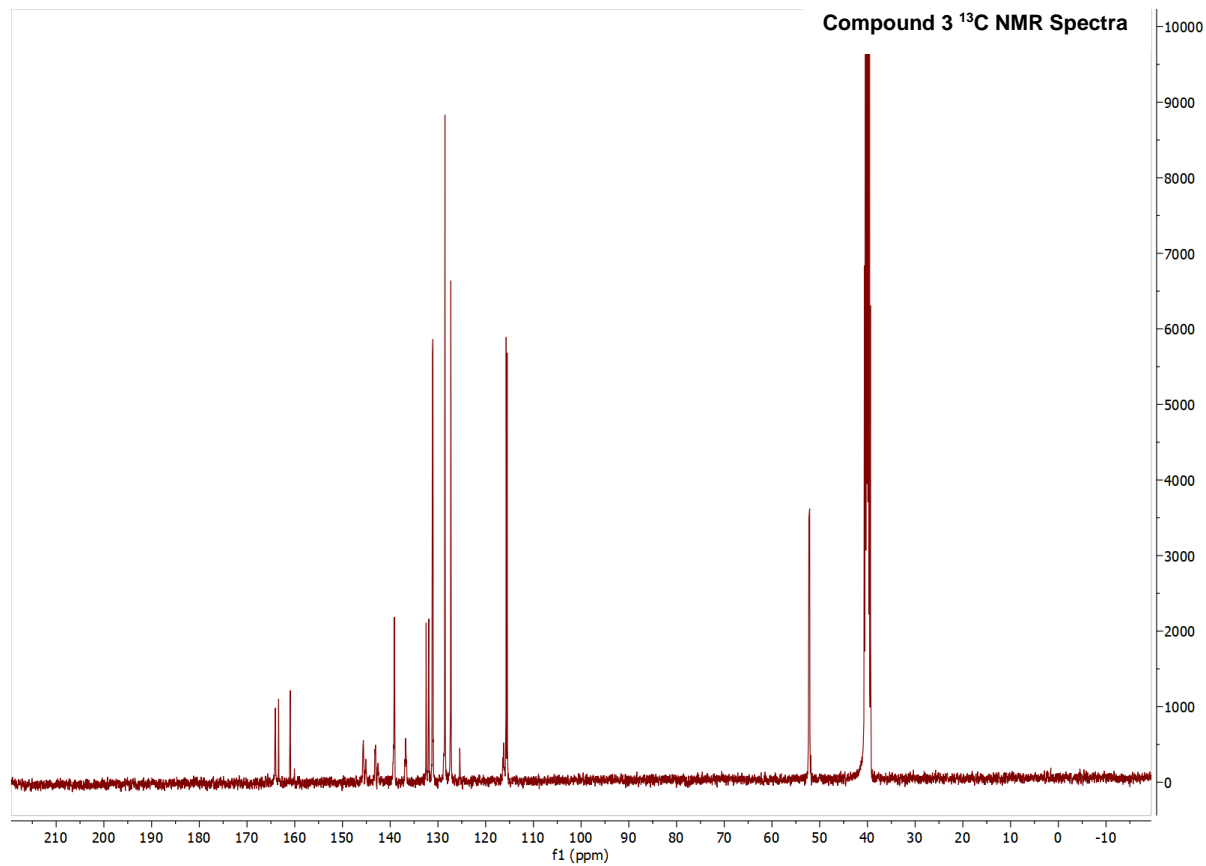

[S35]

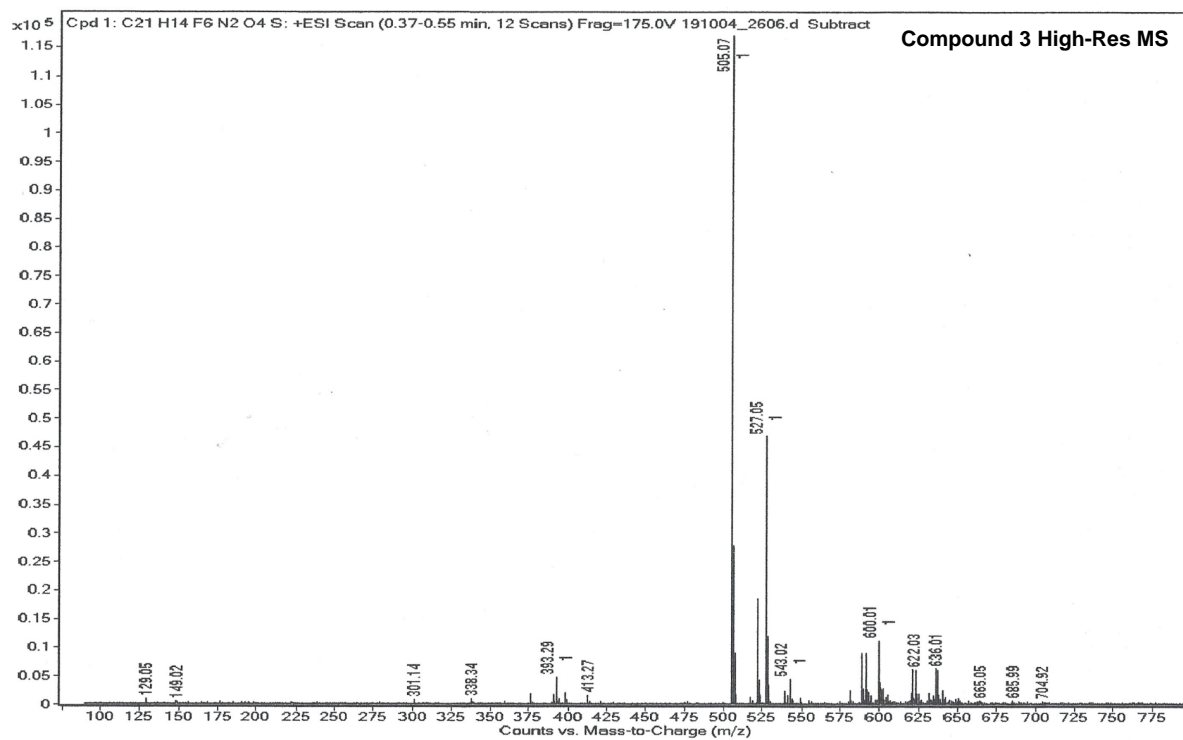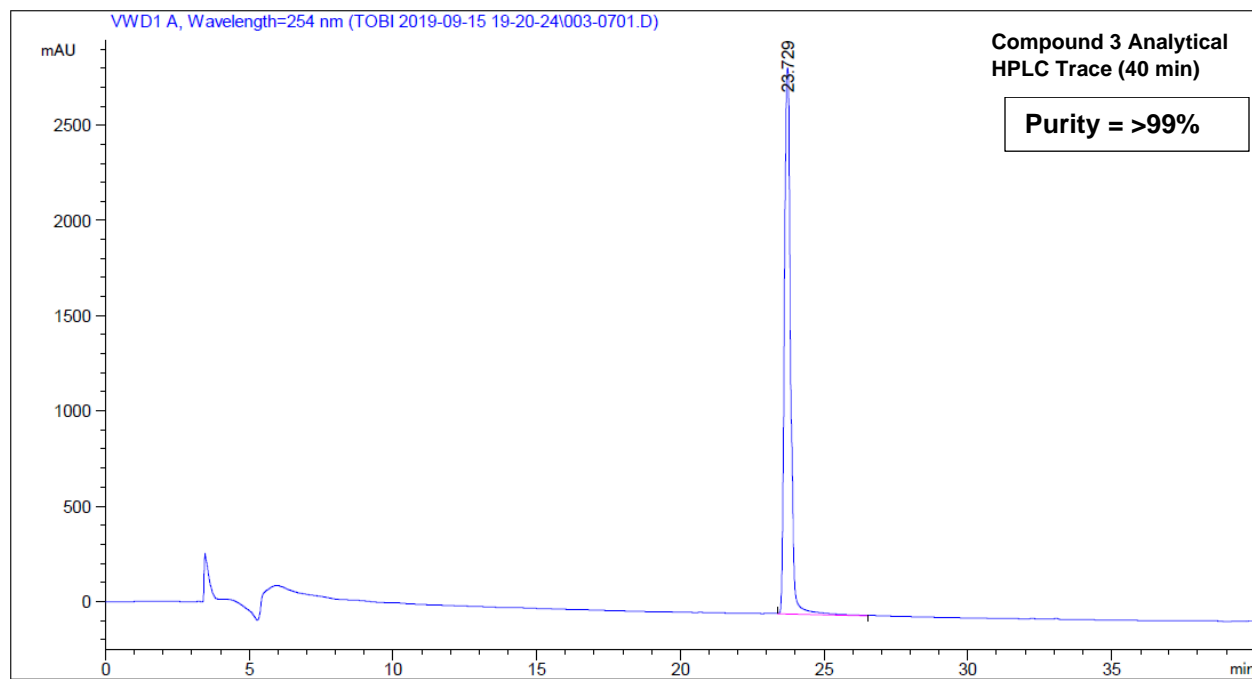

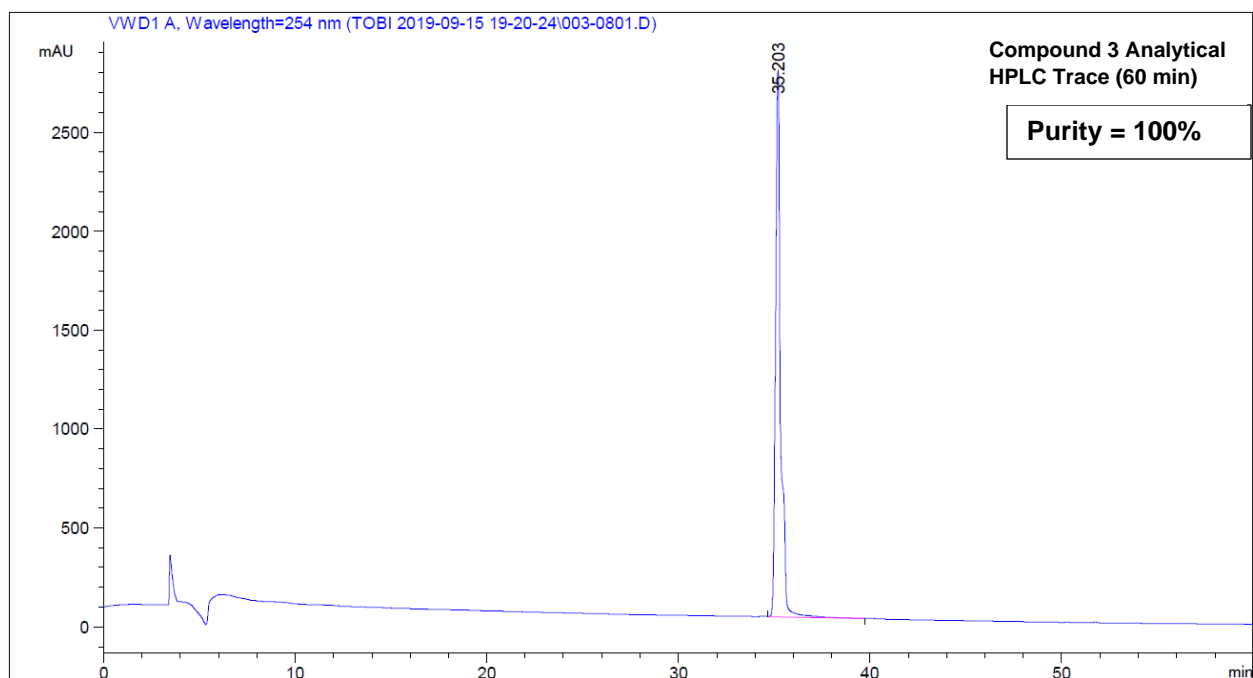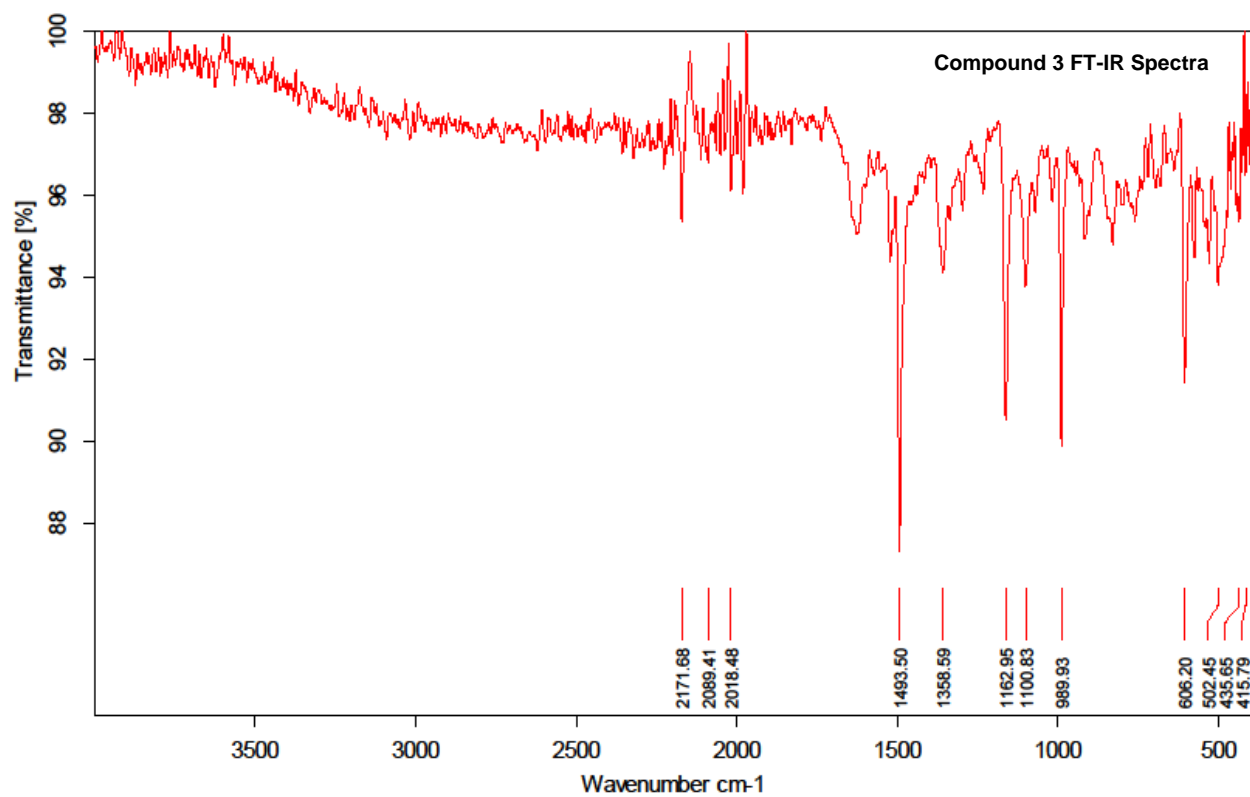

**N-hydroxy-4-(((2,3,4,5,6-pentafluoro-N-(4-(trifluoromethyl)benzyl)phenyl)sulfonamido)methyl)benzamide** Yield: 54%

**Compound 4**

C<sub>22</sub>H<sub>14</sub>F<sub>8</sub>N<sub>2</sub>O<sub>4</sub>S

Mol. Weight: 554.41 g·mol<sup>-1</sup>

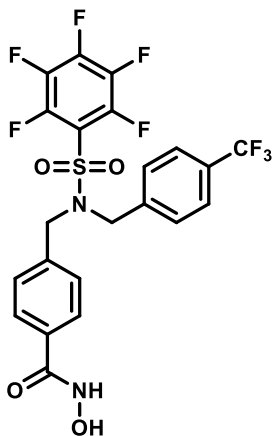

<sup>1</sup>H NMR (400 MHz, DMSO) δ 11.22 (s, 1H), 9.06 (s, 1H), 7.72 – 7.55 (m, 4H), 7.44 (dd, *J* = 8.3, 3.9 Hz, 2H), 7.30 (d, *J* = 8.0 Hz, 2H), 4.67 (d, *J* = 3.2 Hz, 4H).

<sup>19</sup>F NMR (376 MHz, DMSO) δ -59.4 – -62.1 (m), -136.3 (dq, *J* = 30.5, 12.5, 9.6 Hz), -144.6 – -150.0 (m), -157.8 – -161.5 (m).

<sup>13</sup>C NMR (101 MHz, DMSO) δ 164.3, 160.0, 152.7, 145.6, 145.1, 142.6, 140.8, 139.2, 138.9, 136.7, 132.6, 129.9, 129.0, 127.9, 125.9, 123.2, 118.6, 52.8





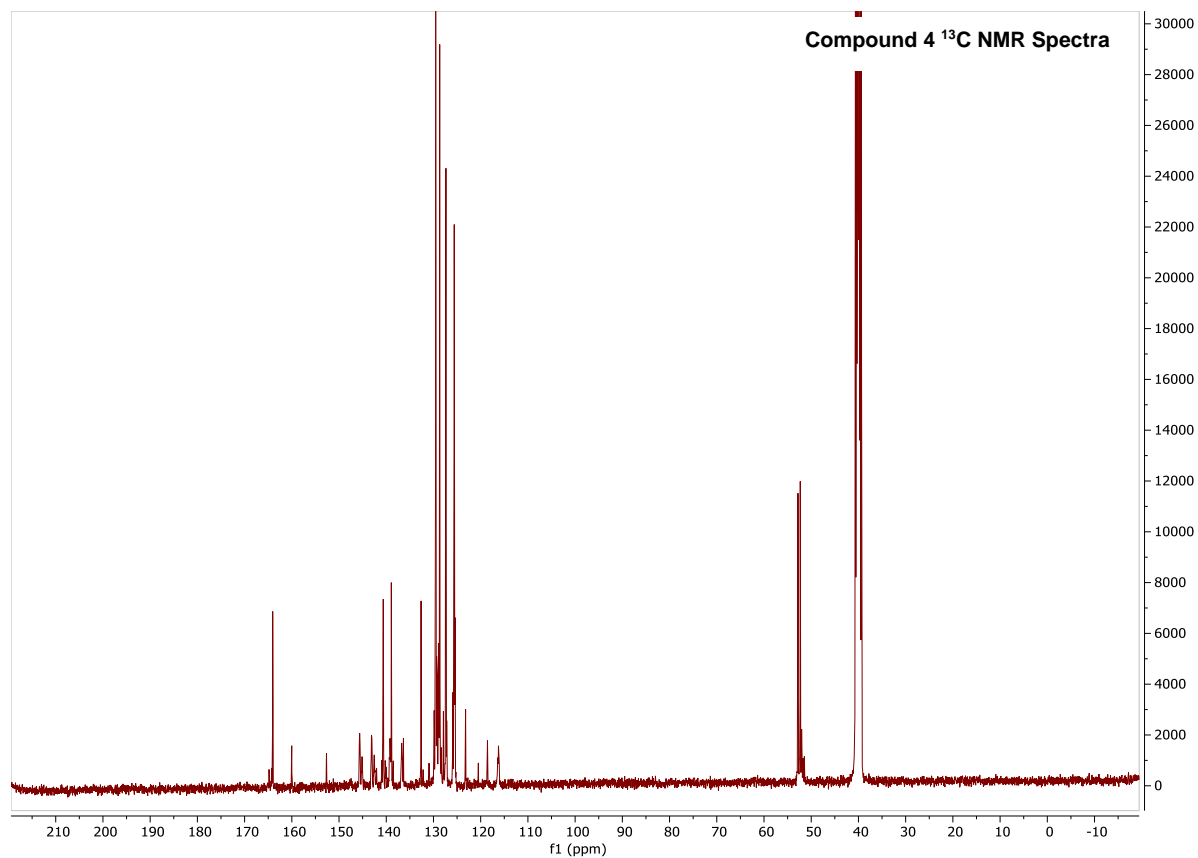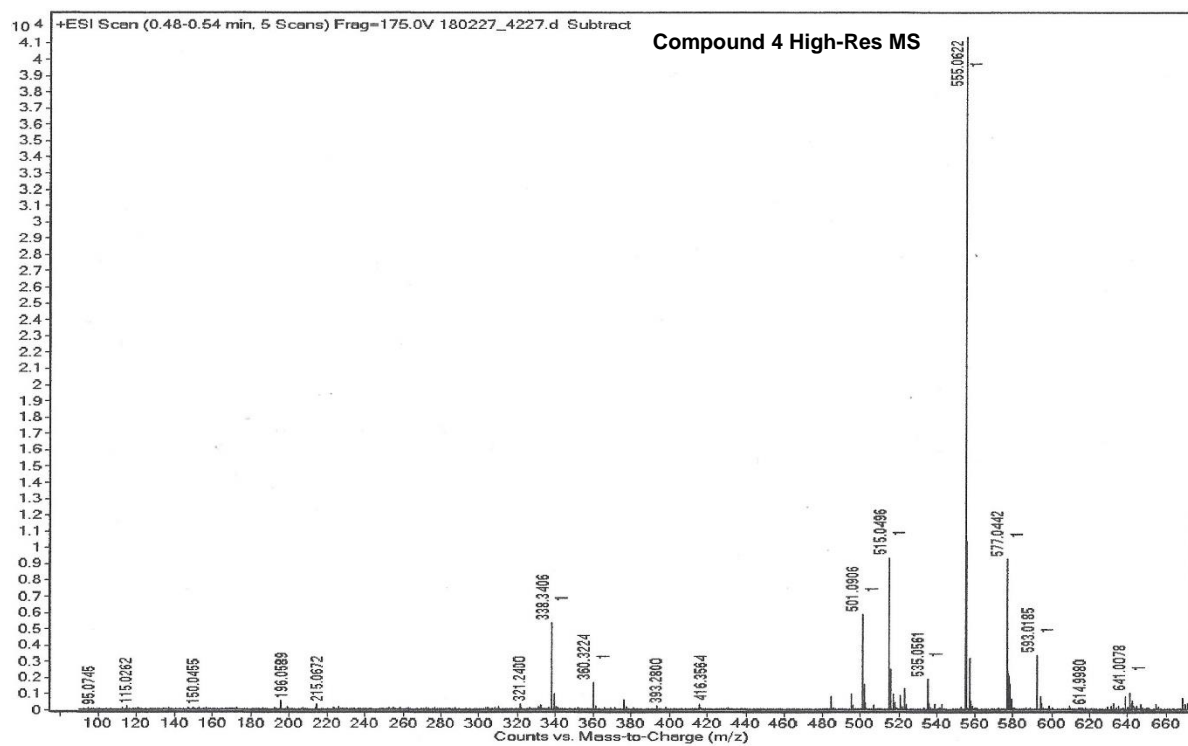

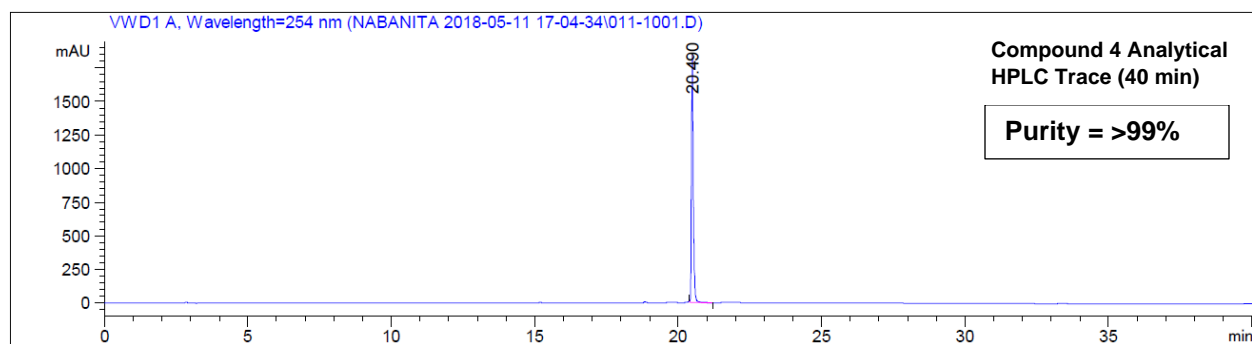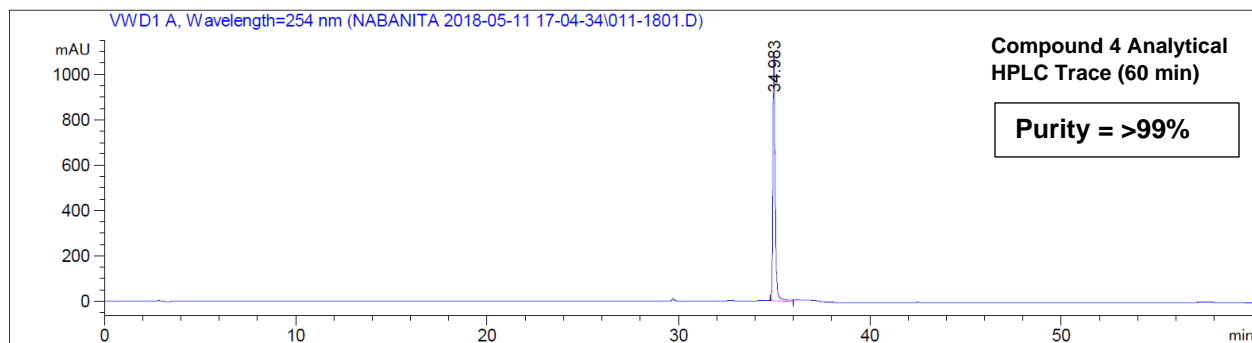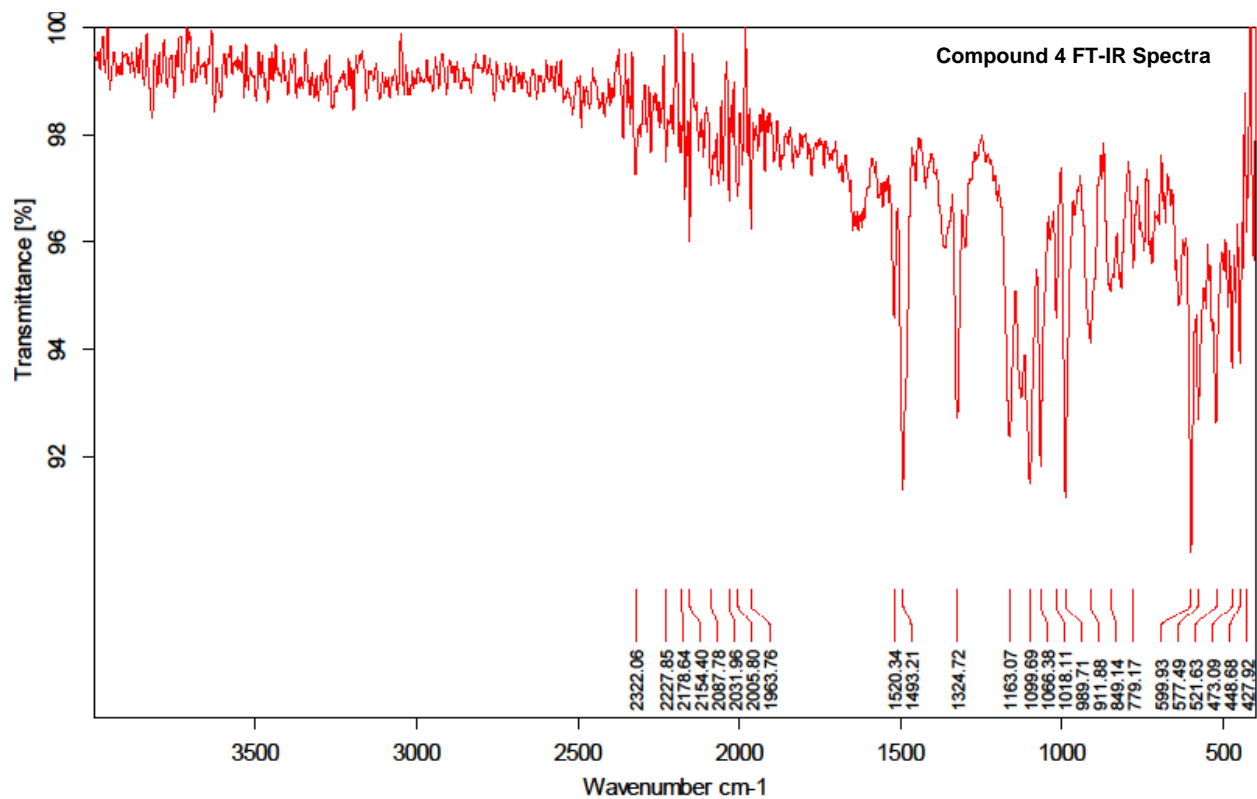

**4-(((N-(4-(dimethylamino)benzyl)-2,3,4,5,6-pentafluorophenyl)sulfonamido)methyl)-N-hydroxybenzamide. Yield: 38%**

**Compound 5**

$C_{23}H_{20}F_5N_3O_4S$

Mol. Weight: 529.49  $g\cdot mol^{-1}$

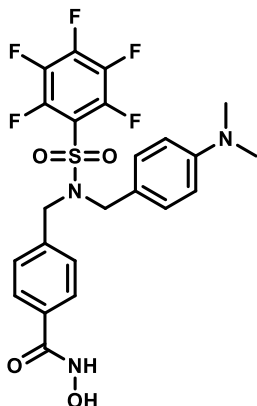

$^1H$  NMR (400 MHz, DMSO)  $\delta$  11.21 (s, 1H), 9.05 (s, 1H), 7.75 – 7.66 (m, 2H), 7.35 – 7.28 (m, 2H), 7.06 – 6.97 (m, 2H), 6.60 – 6.52 (m, 2H), 4.62 (s, 2H), 4.37 (s, 2H), 2.85 (s, 6H).

$^{19}F$  NMR (376 MHz, DMSO)  $\delta$  -73.9, -136.3 (d,  $J$  = 24.0 Hz), -148.0 (t,  $J$  = 23.2 Hz), -160.1 (t,  $J$  = 21.8 Hz)

$^{13}C$  NMR (101 MHz, DMSO)  $\delta$  166.4, 150.6, 142.6, 142.4, 142.2, 136.6, 130.3, 130.0, 129.9, 129.7, 129.5, 129.4, 129.3, 129.1, 128.6, 122.3, 121.7, 116.9, 112.4, 112.3, 60.2, 52.6, 52.6, 52.3, 52.1, 51.5, 42.9, 42.9, 14.6.

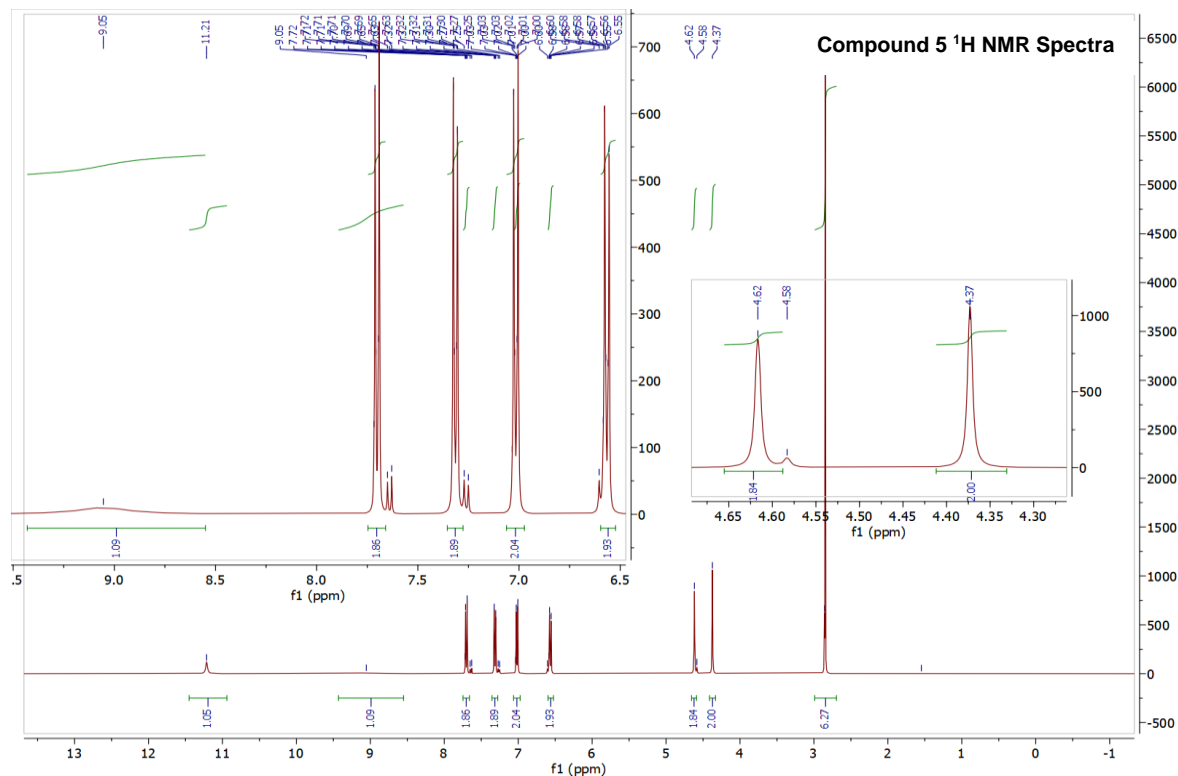

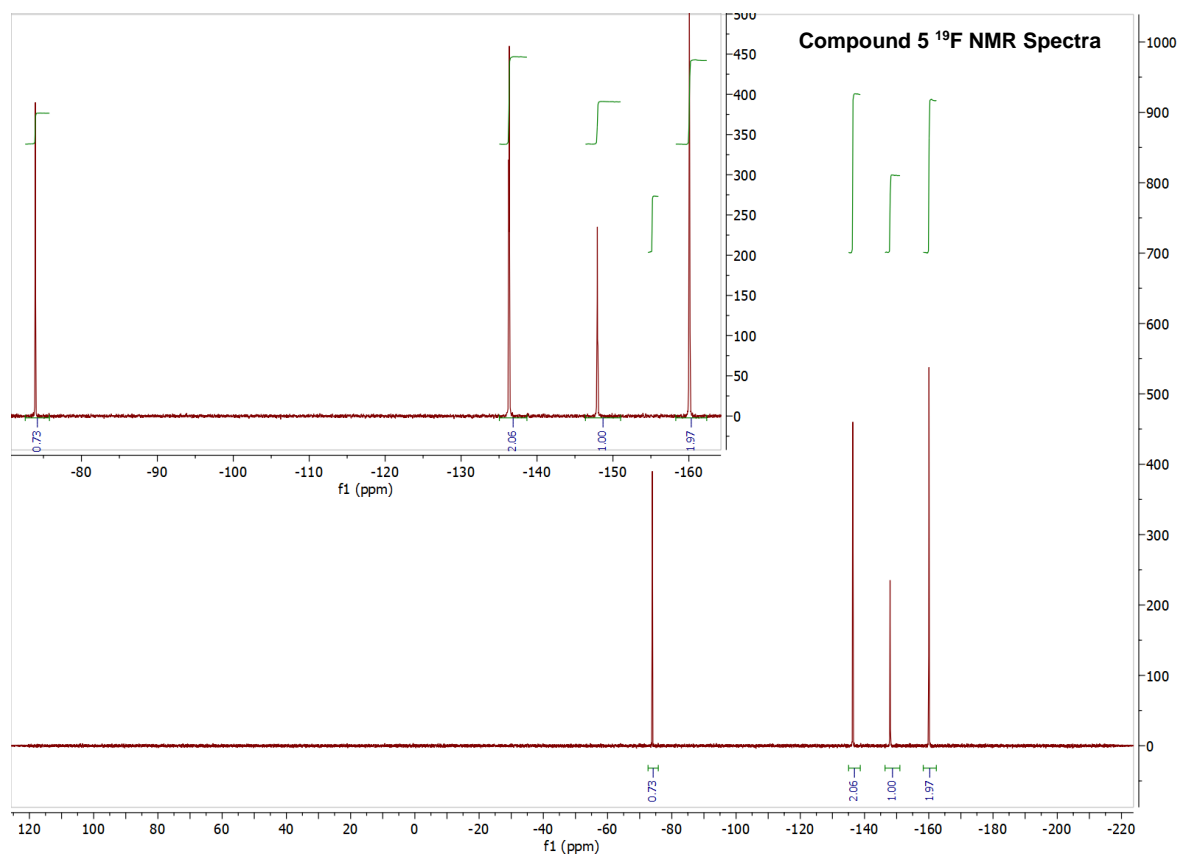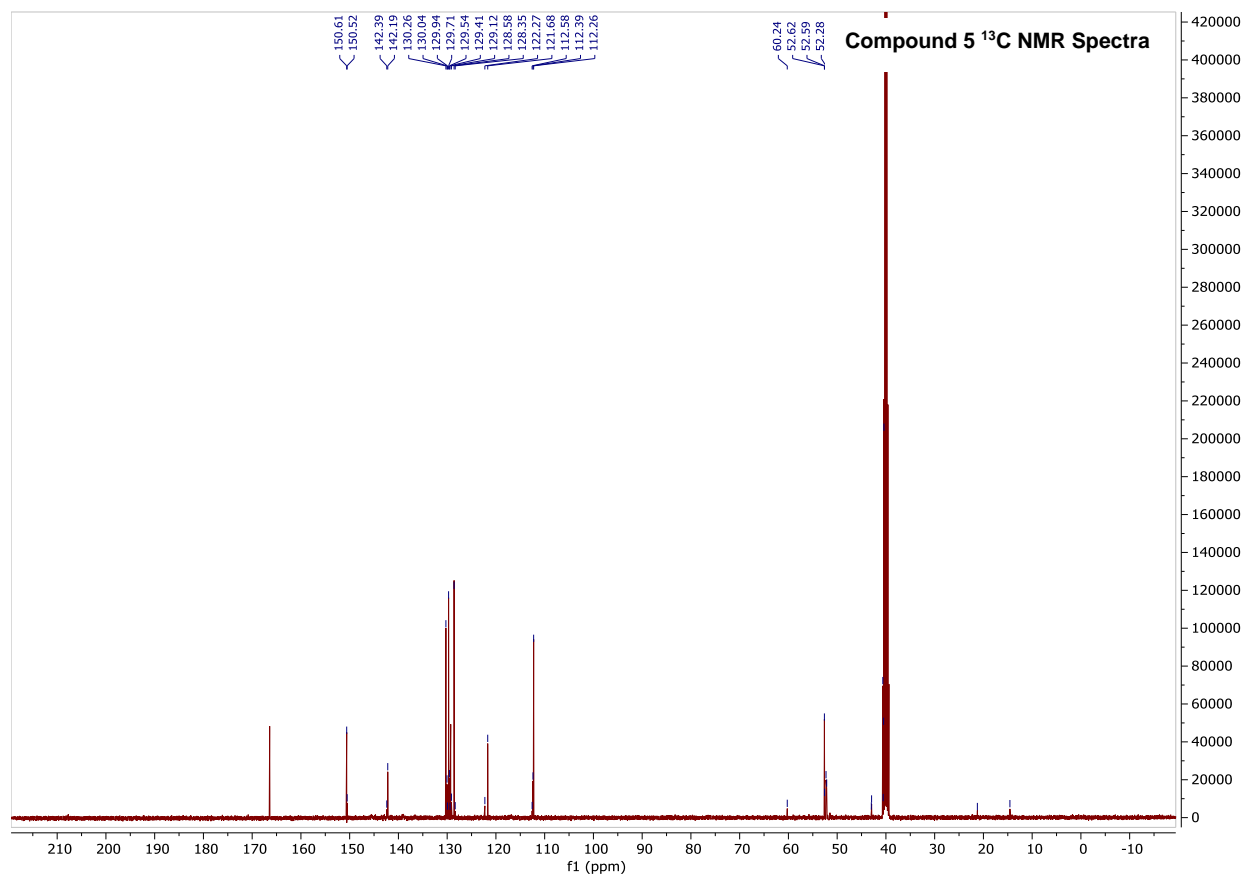

[S43]

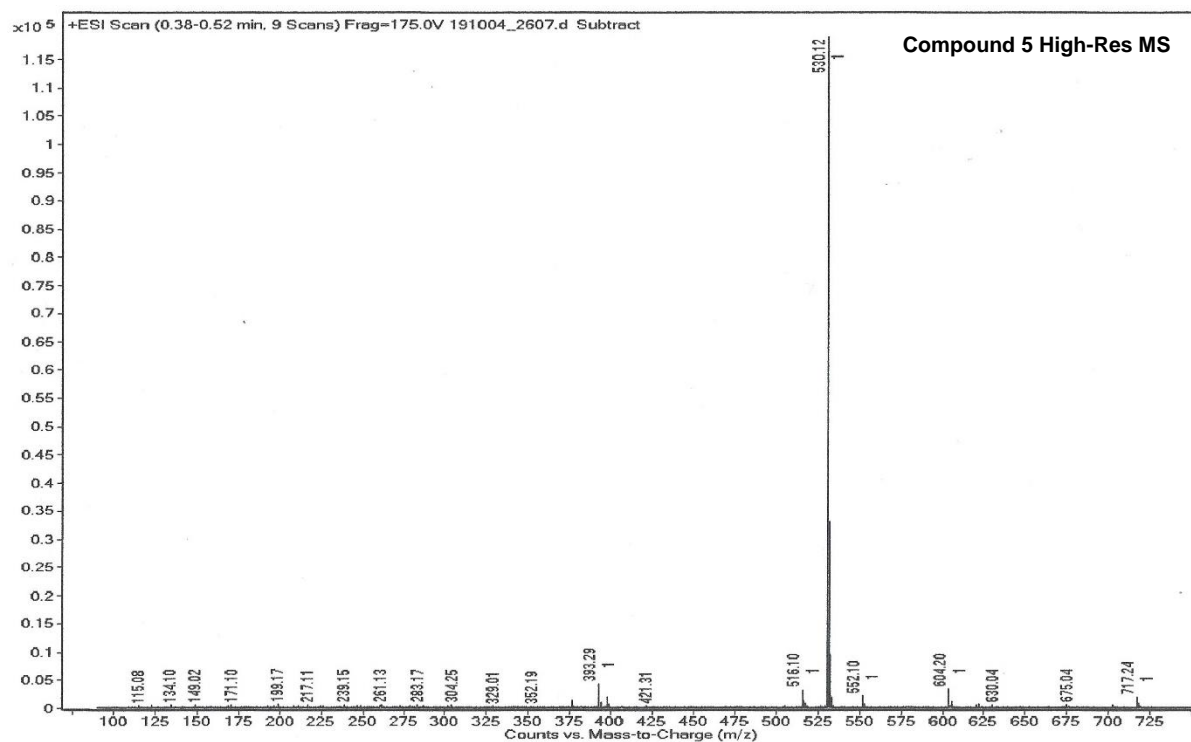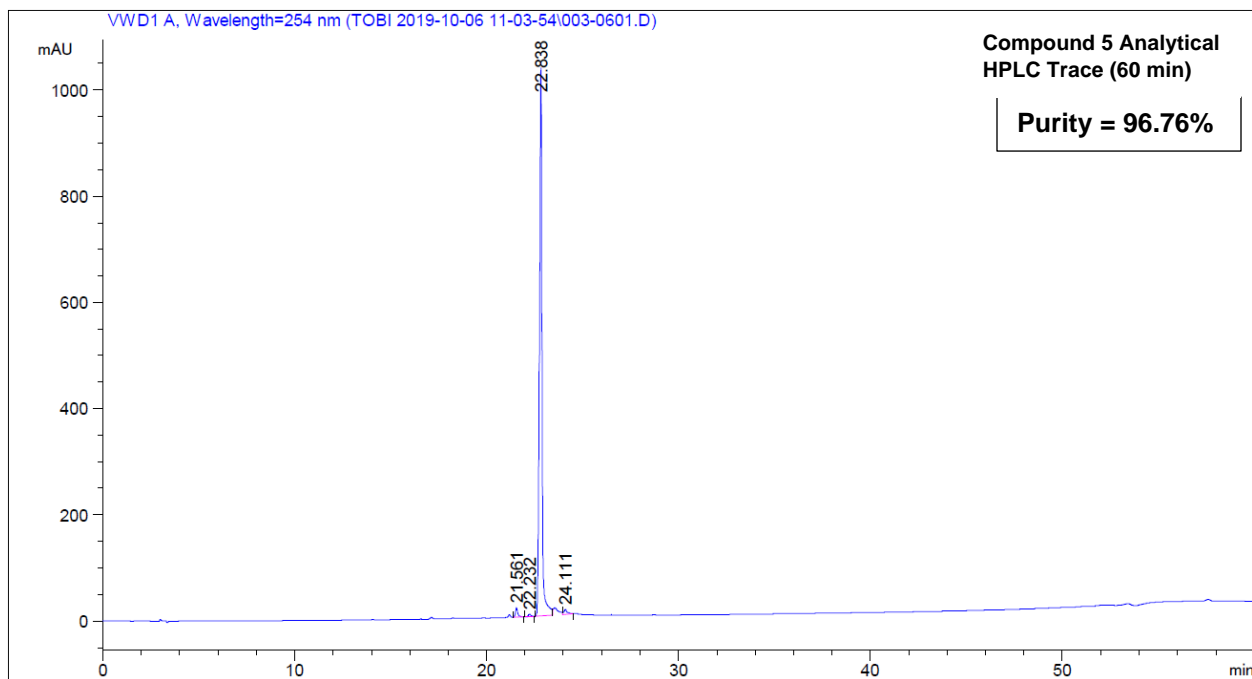

**N-hydroxy-4-(((2,3,4,5,6-pentafluoro-N-(4-methylbenzyl)phenyl)sulfonamido)methyl)benzamide.**  
Yield: 61%

**Compound 6**

C<sub>22</sub>H<sub>17</sub>F<sub>5</sub>N<sub>2</sub>O<sub>4</sub>S

Mol. Weight: 500.45 g·mol<sup>-1</sup>

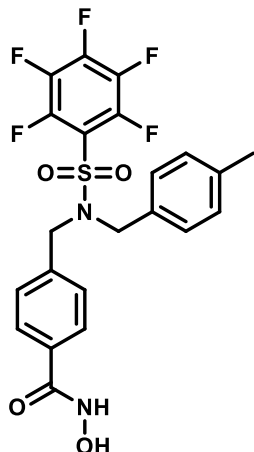

<sup>1</sup>H NMR (400 MHz, DMSO) δ 11.22 (s, 1H), 9.07 (s, 1H), 7.71 – 7.63 (m, 2H), 7.31 – 7.23 (m, 2H), 7.13 – 7.02 (m, 4H), 4.59 (s, 2H), 4.48 (s, 2H), 2.24 (s, 3H).

<sup>19</sup>F NMR (376 MHz, DMSO) δ -135.5 – -138.2 (m), -147.4 (tt, *J* = 22.5, 6.3 Hz), -159.9 (tt, *J* = 22.5, 5.8 Hz).

<sup>13</sup>C NMR (101 MHz, DMSO) δ 164.2, 145.7, 145.6, 145.5, 145.5, 143.1, 143.1, 143.0, 142.9, 139.2, 139.2, 139.1, 137.7, 136.7, 136.5, 132.5, 132.3, 129.3, 129.0, 128.5, 127.4, 116.7, 116.5, 116.4, 52.3, 52.1, 21.0.

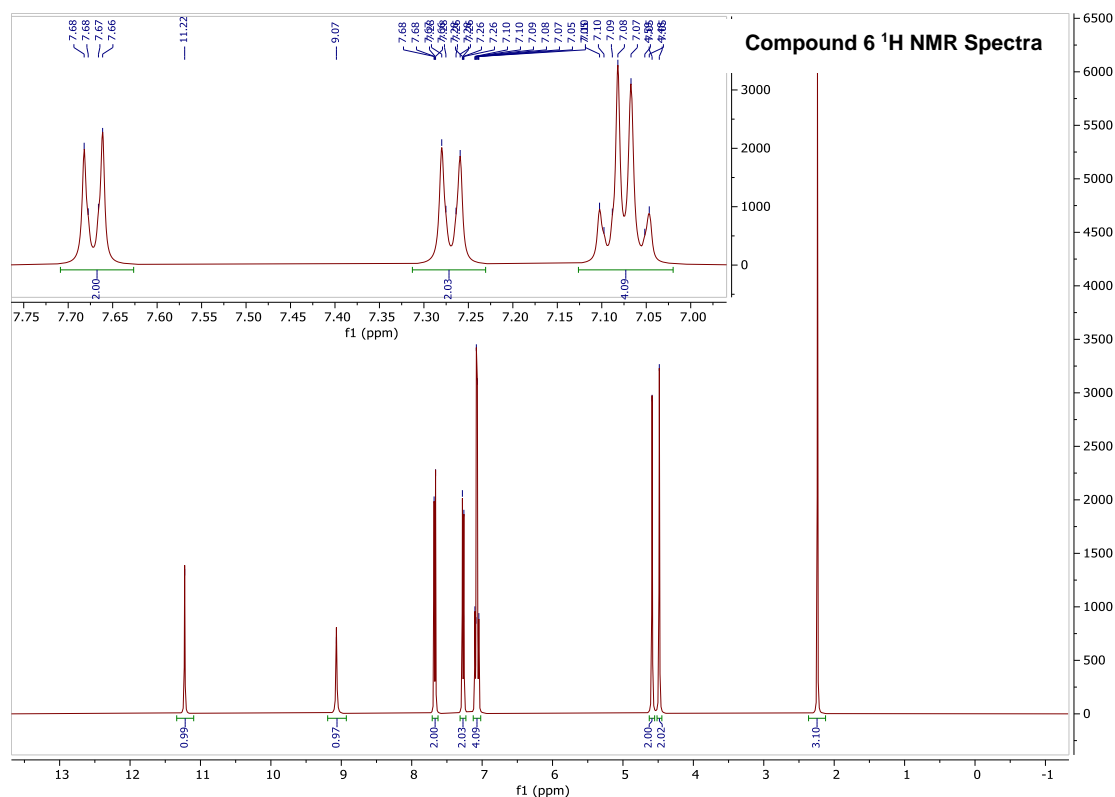

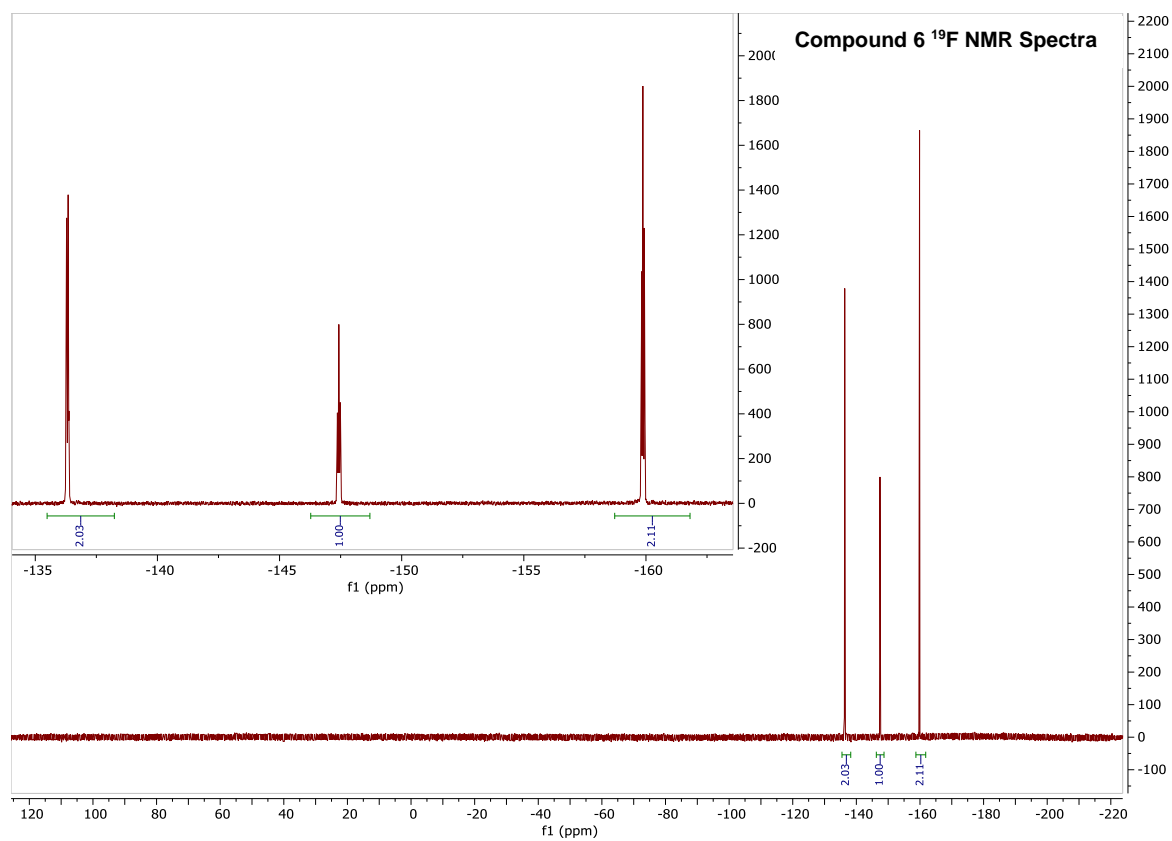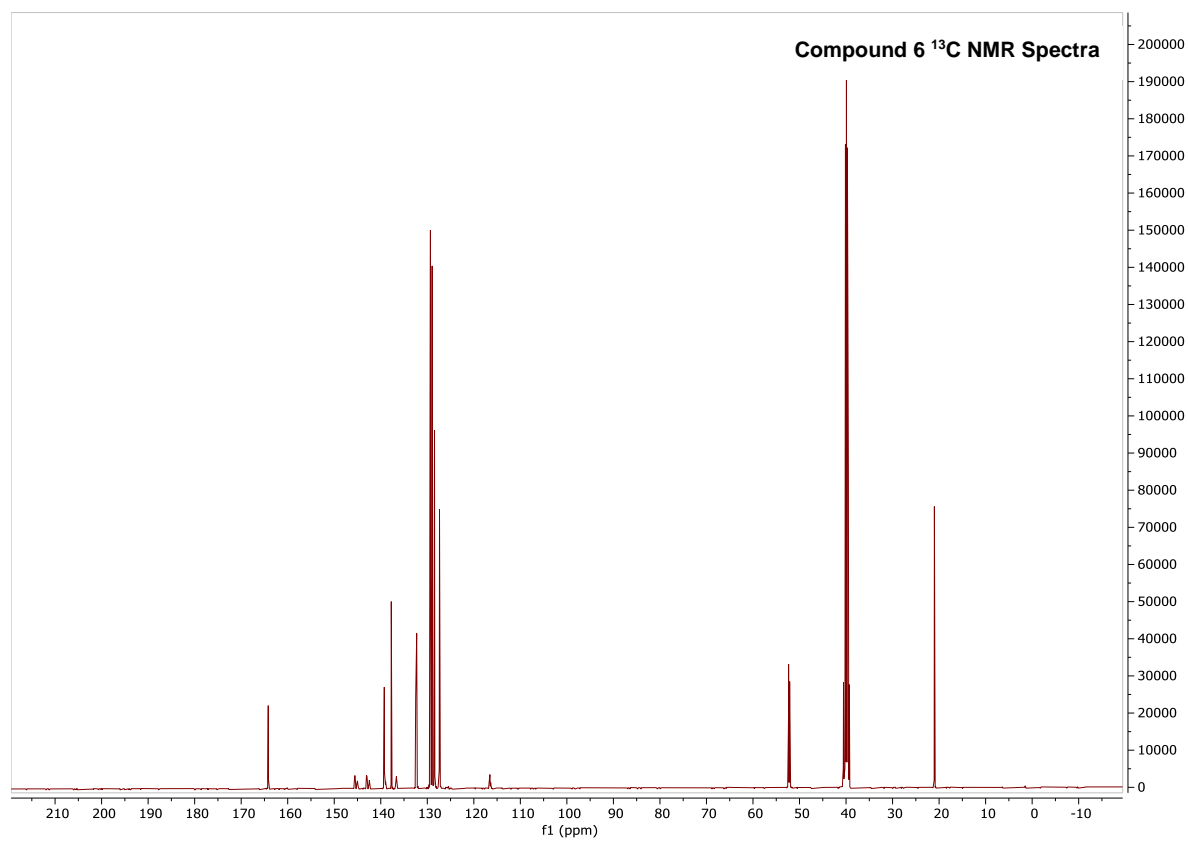

[S46]



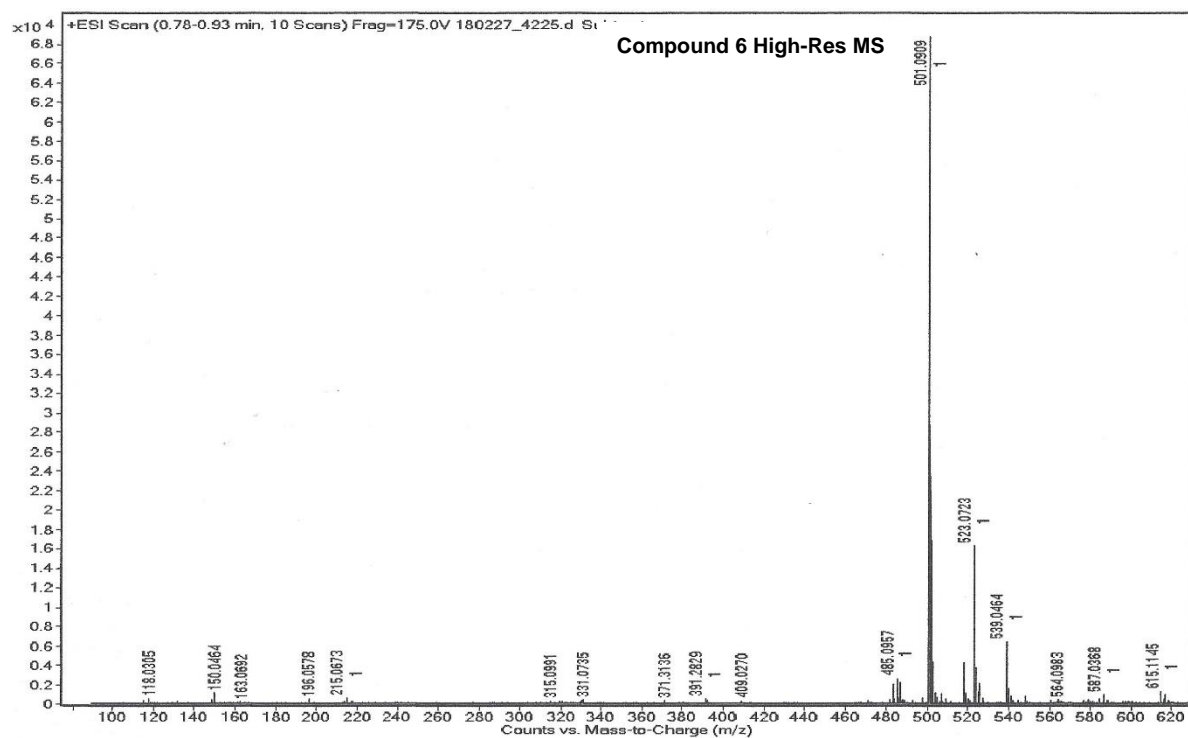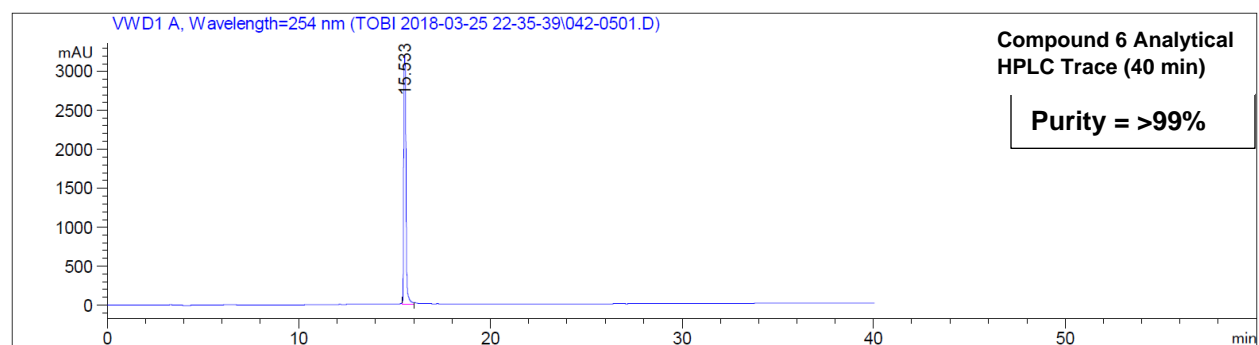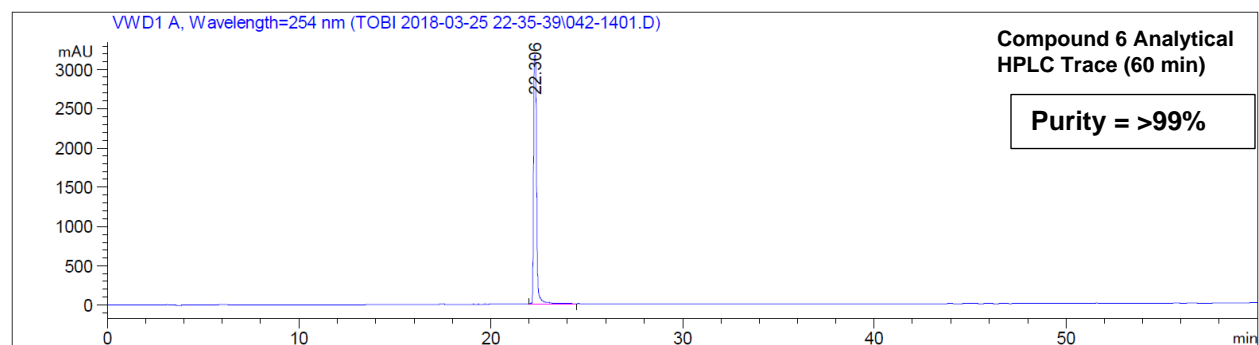

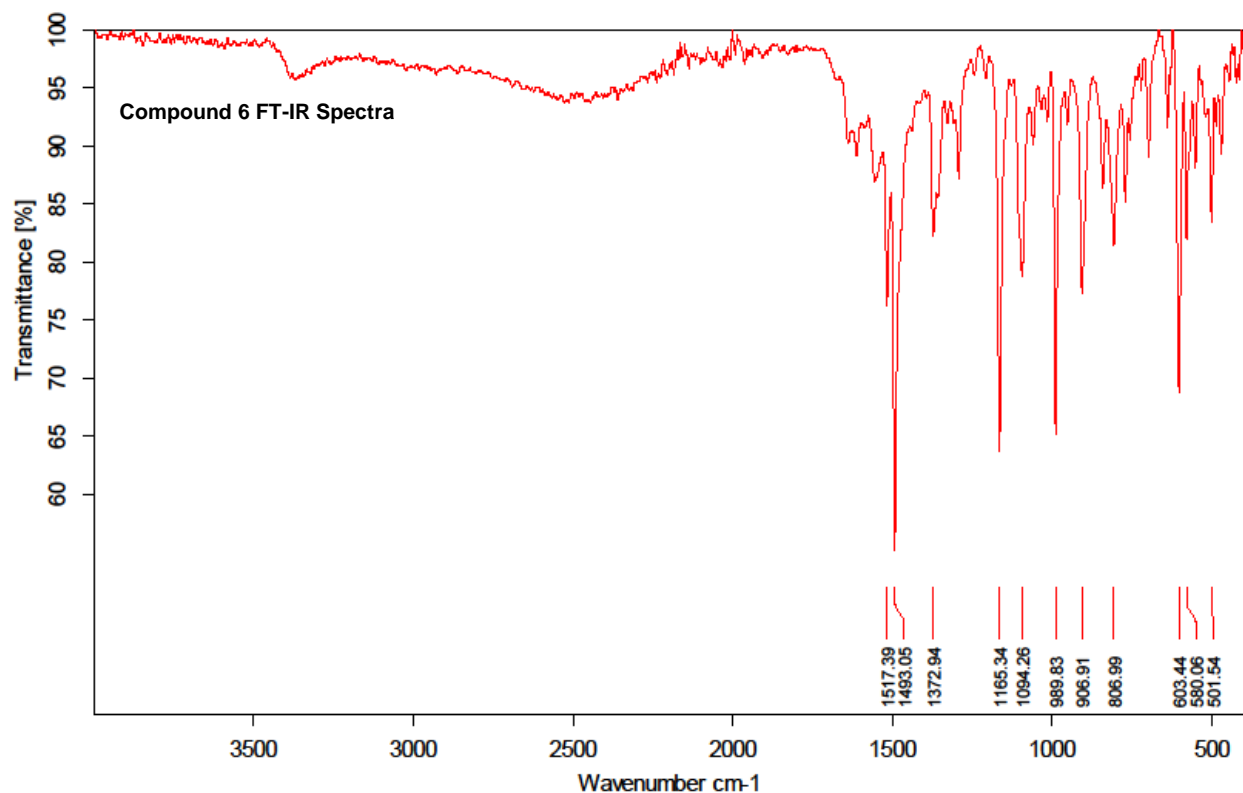

**4-(((N-(4-(tert-butyl)benzyl)-2,3,4,5,6-pentafluorophenyl)sulfonamido)methyl)-N-hydroxybenzamide.**  
Yield: 58%

**Compound 7**

C<sub>25</sub>H<sub>23</sub>F<sub>5</sub>N<sub>2</sub>O<sub>4</sub>S

Mol. Weight: 542.53 gmol<sup>-1</sup>

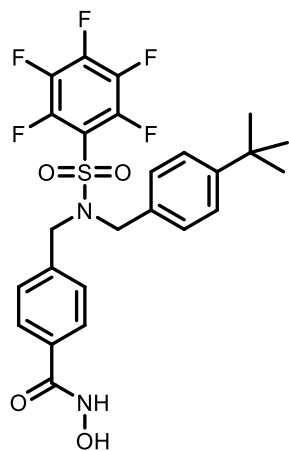

<sup>1</sup>H NMR (400 MHz, DMSO) δ 11.39 – 11.00 (m, 1H), 9.07 (s, 1H), 7.70 (dd, *J* = 8.0, 2.3 Hz, 2H), 7.32 (d, *J* = 7.9 Hz, 2H), 7.24 (d, *J* = 7.8 Hz, 2H), 7.14 (d, *J* = 8.1 Hz, 2H), 4.68 (s, 2H), 4.49 (s, 2H), 1.23 (s, 9H).

<sup>19</sup>F NMR (376 MHz, DMSO) δ -136.3 (d, *J* = 23.5 Hz), -147.0 – -148.0 (m), -159.9 (t, *J* = 21.5 Hz).

<sup>13</sup>C NMR (101 MHz, DMSO) δ 164.2, 151.0, 143.0, 139.5, 132.5, 132.1, 128.8, 128.6, 128.4, 127.4, 125.4, 116.8, 52.7, 52.2, 34.6, 31.4.

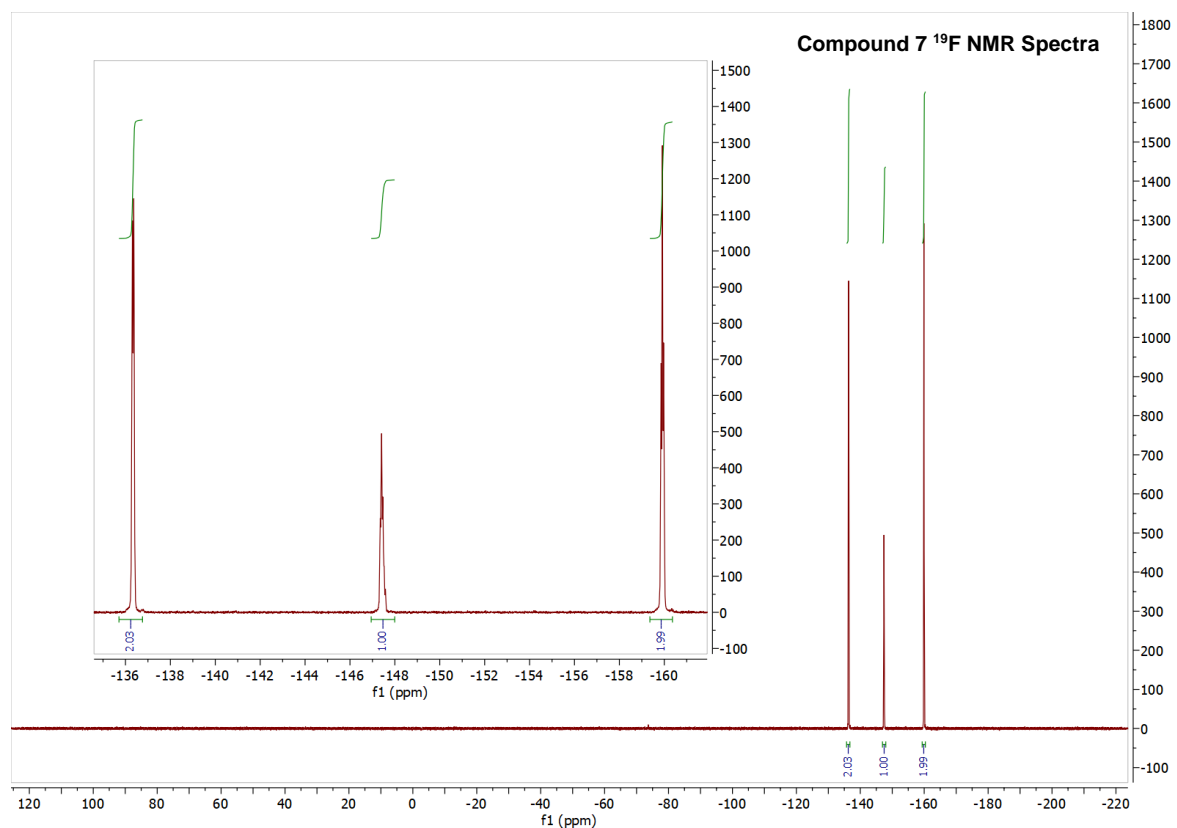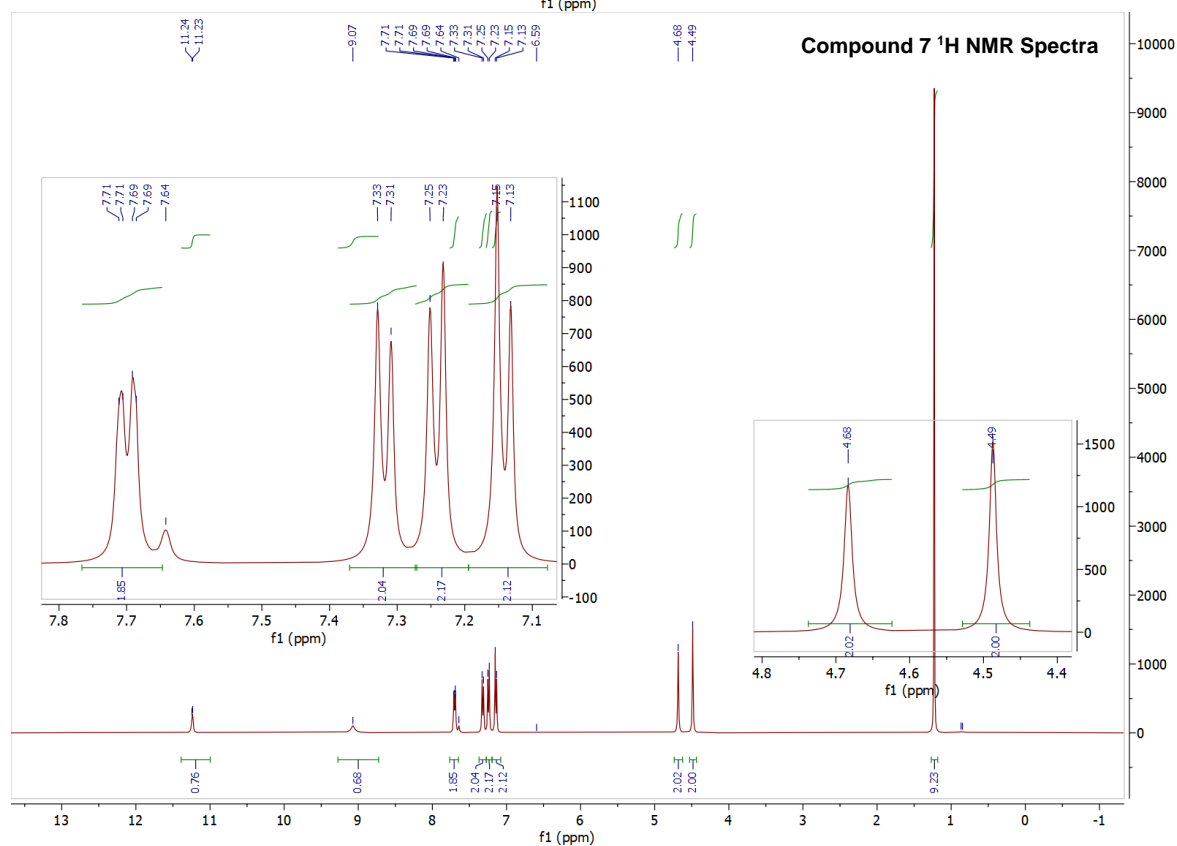

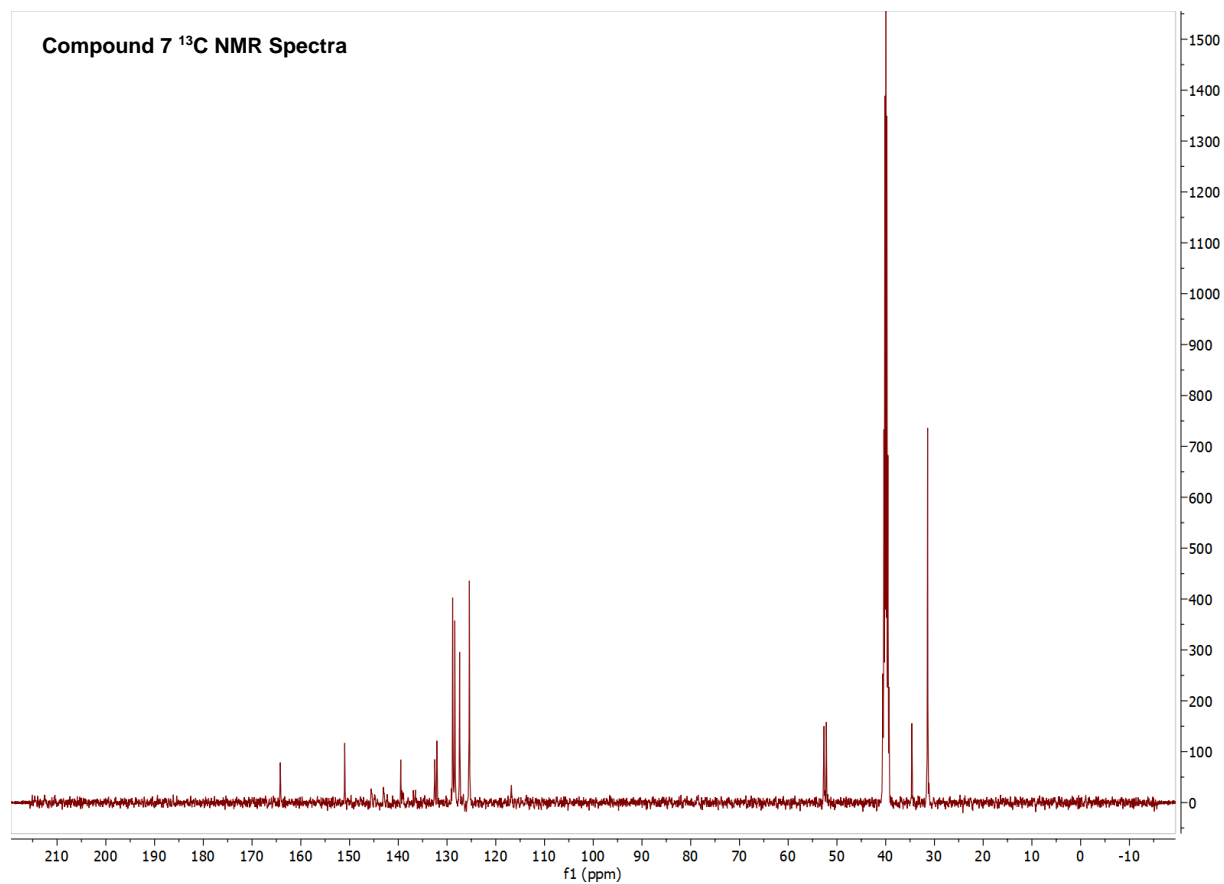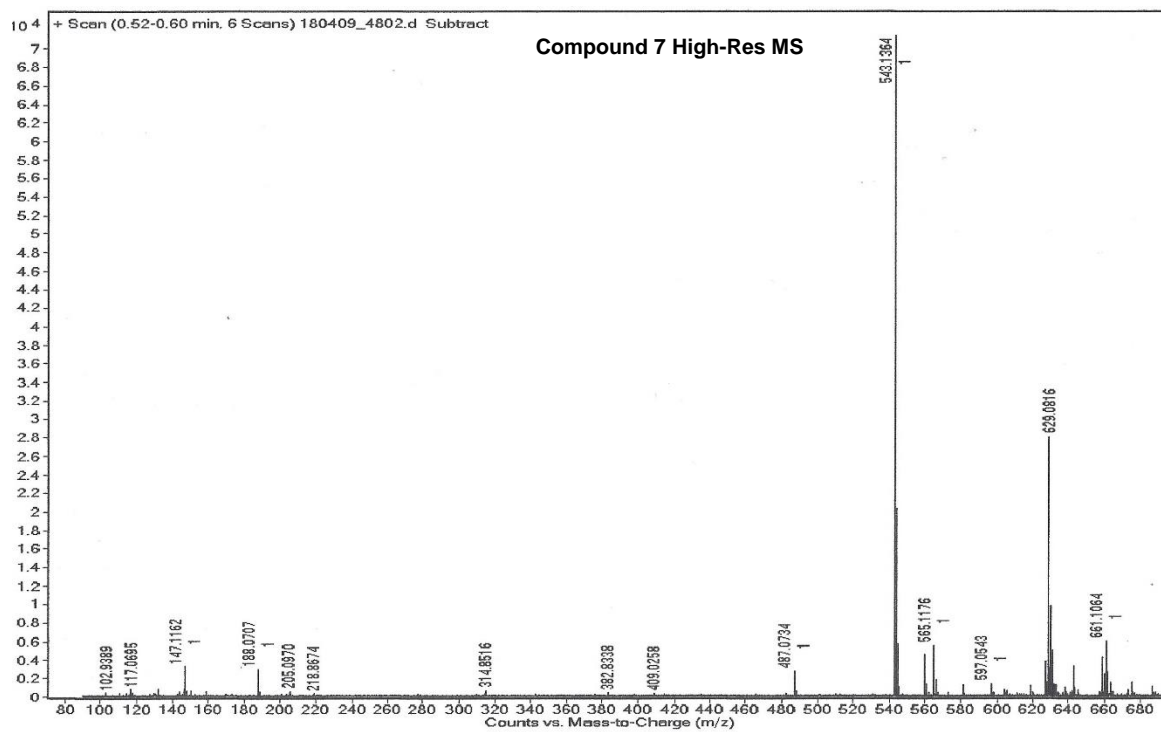

[S50]

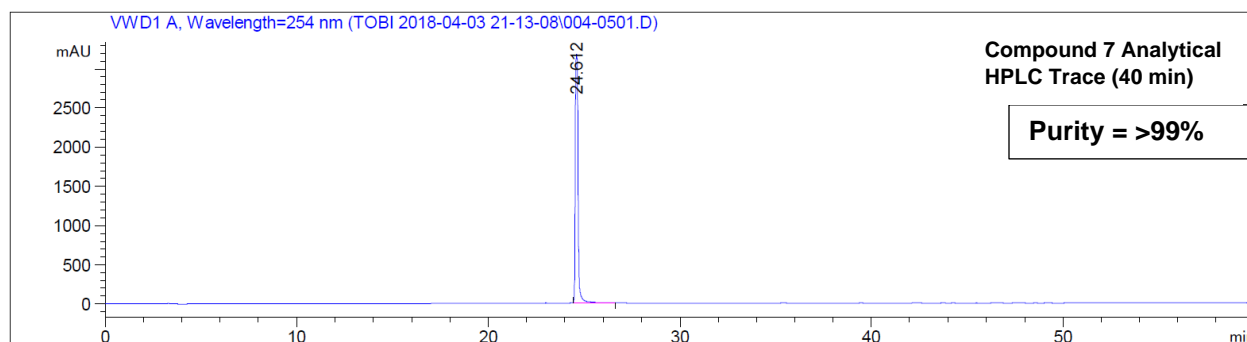

**N-hydroxy-4-(((2,3,4,5,6-pentafluoro-N-(pyridin-4-ylmethyl)phenyl)sulfonamido)methyl)benzamide:**  
Yield 39%

**Compound 8**

$C_{20}H_{14}F_5N_3O_4S$

Mol. Weight: 487.41  $g\cdot mol^{-1}$

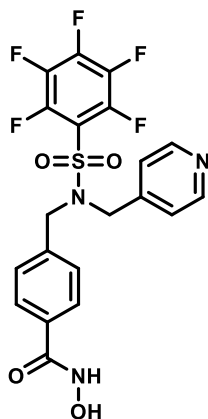

$^1H$  NMR (400 MHz, DMSO)  $\delta$  11.19 (s, 1H), 9.03 (s, 1H), 8.52 – 8.37 (m, 2H), 7.66 – 7.58 (m, 1H), 7.58 – 7.49 (m, 1H), 7.32 – 7.26 (m, 1H), 7.26 – 7.12 (m, 3H), 4.70 – 4.51 (m, 4H).

$^{19}F$  NMR (376 MHz, DMSO)  $\delta$  -136.1 – -136.7 (m), -147.0 (dt,  $J$  = 46.2, 22.7 Hz), -159.3 – -159.8 (m).

$^{13}C$  NMR (101 MHz, DMSO)  $\delta$  164.1, 163.3, 160.9, 160.1, 139.4, 136.9, 132.4, 131.1, 131.0, 129.7, 128.9, 128.7, 128.5, 128.3, 127.9, 127.3, 125.4, 115.7, 113.3, 51.7.

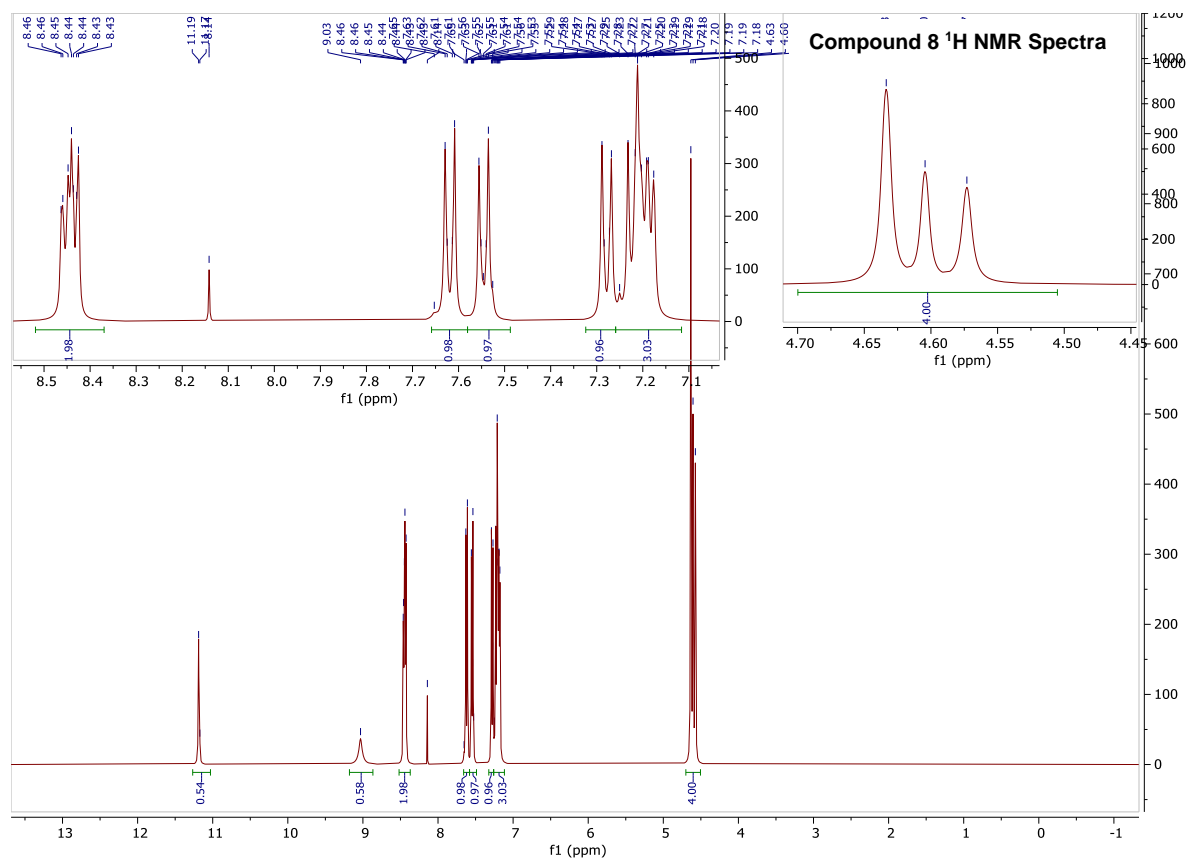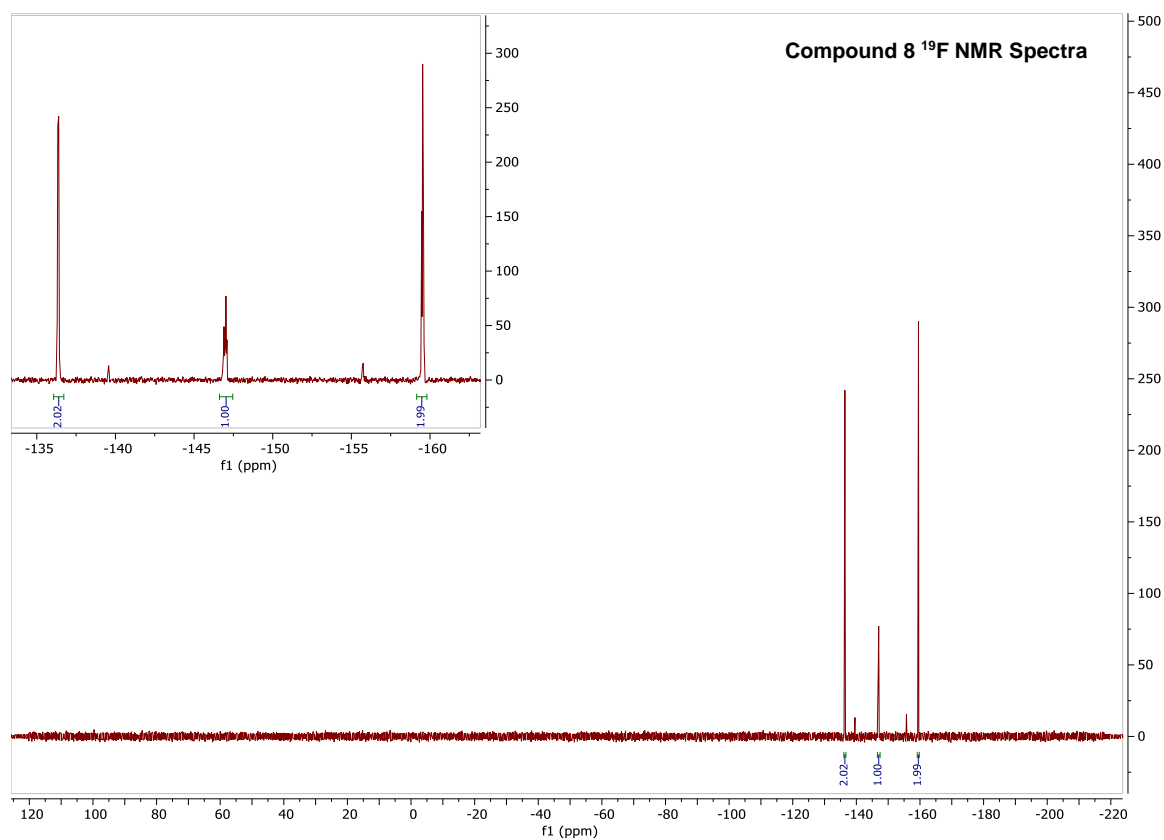

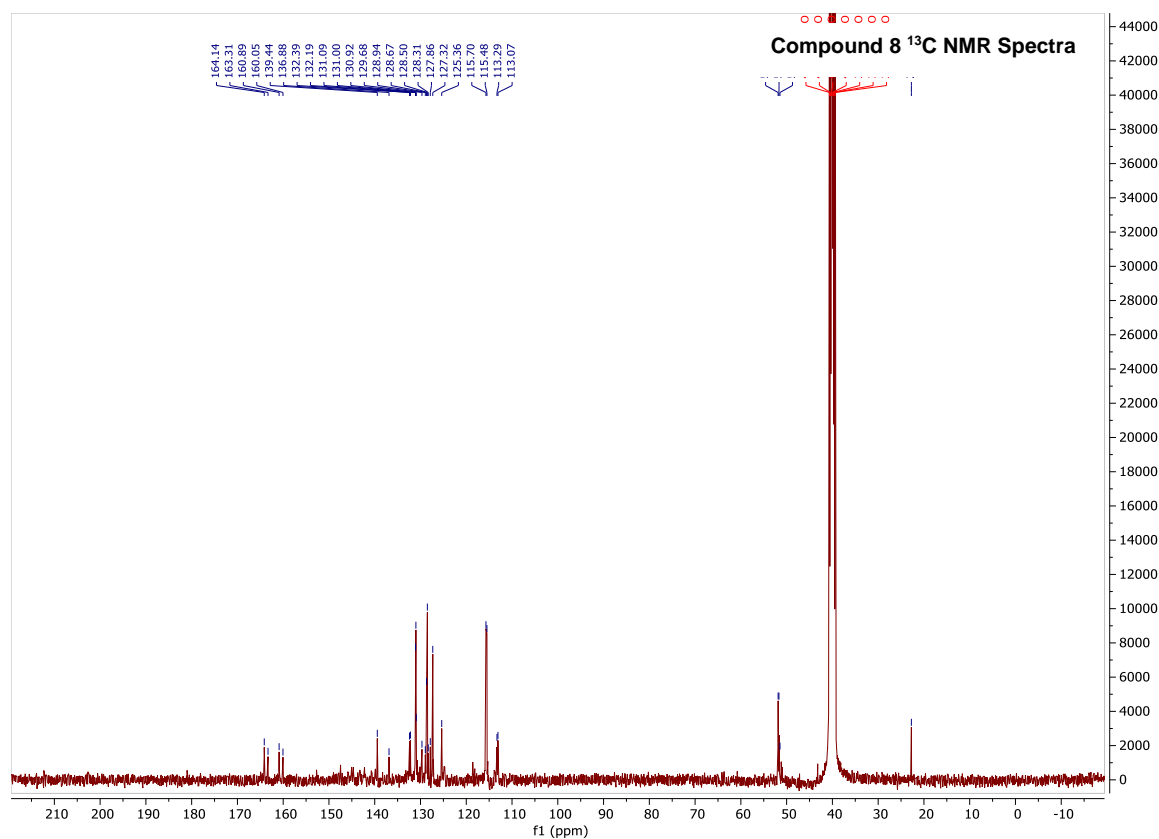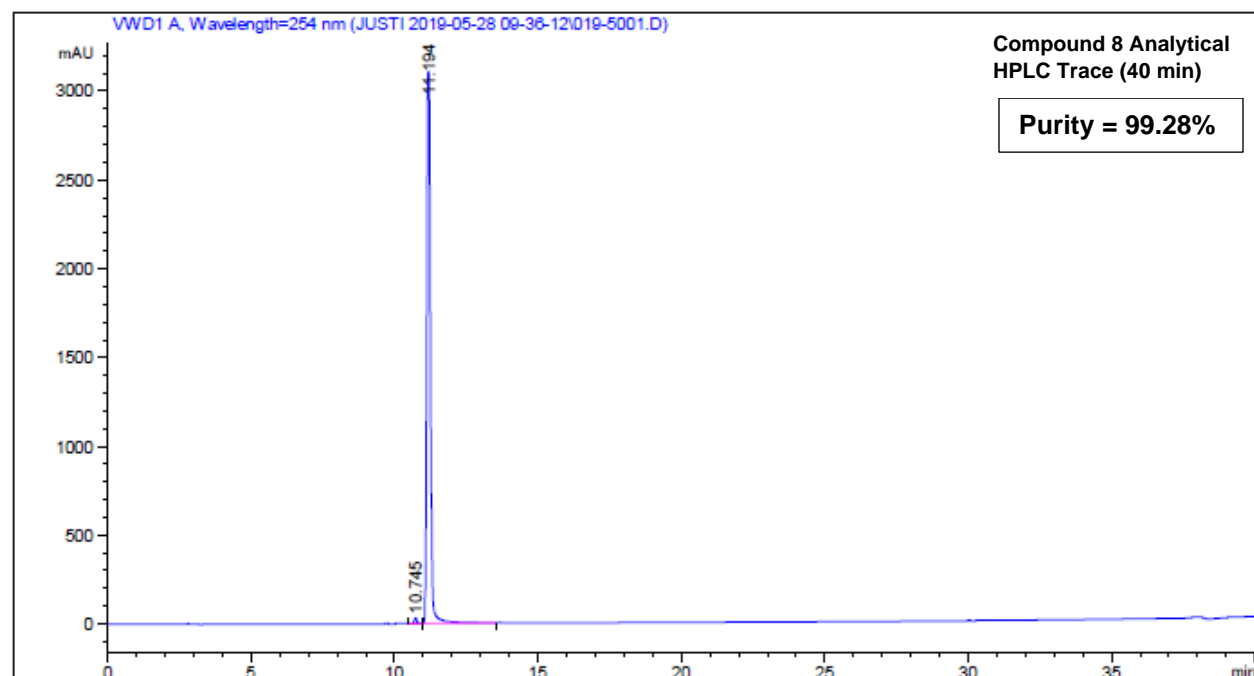



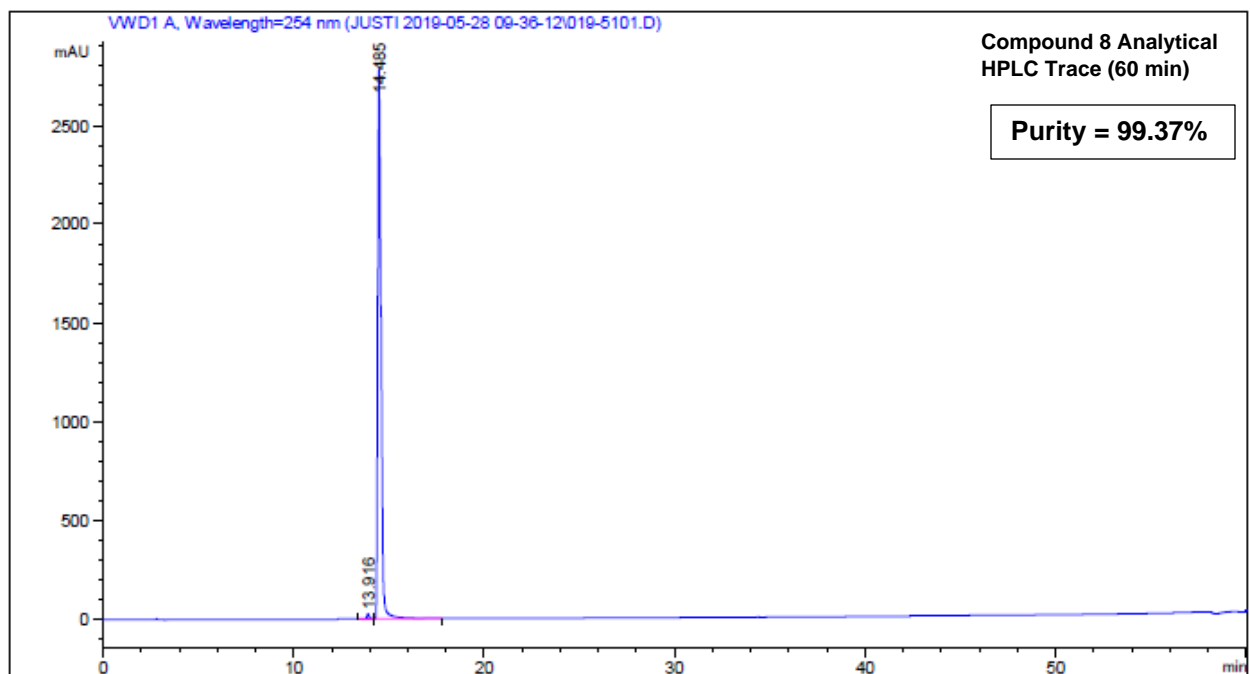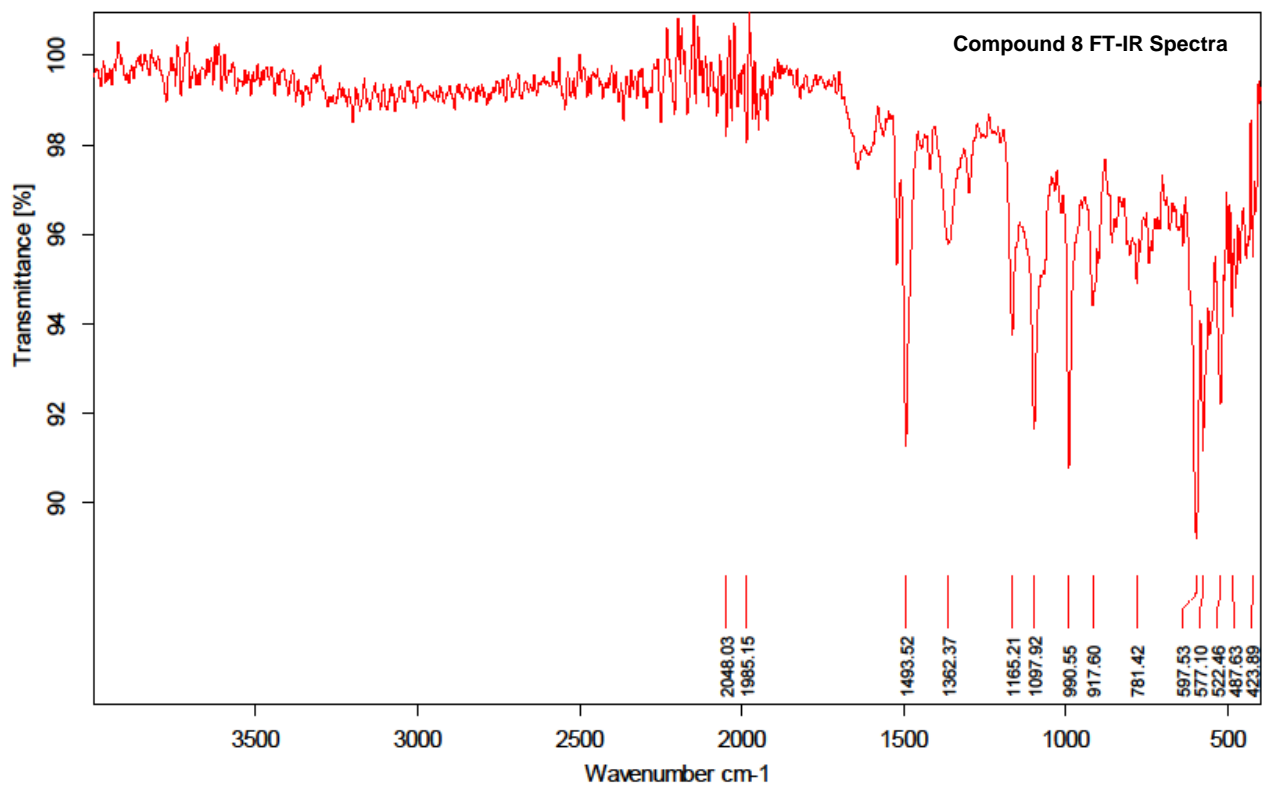

Compound 8 High-Res MS

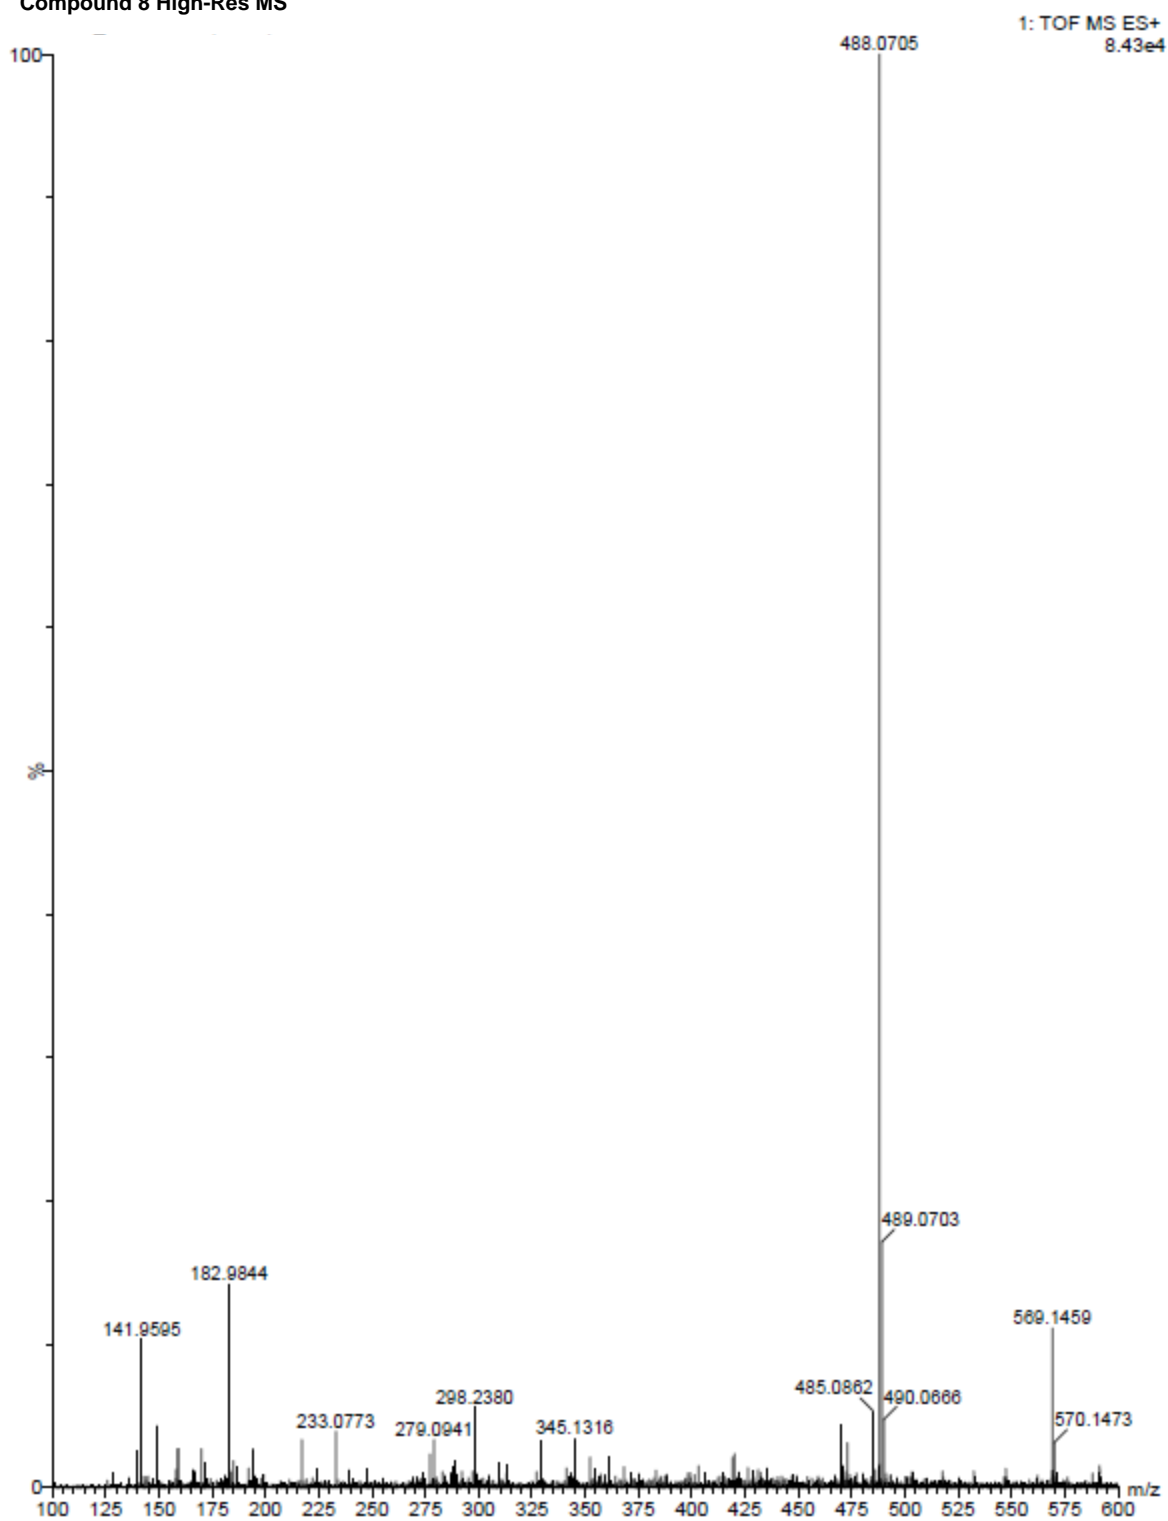

**N-hydroxy-4-(((2,3,4,5-tetrafluoro-N-(pyridin-4-ylmethyl)phenyl)sulfonamido)methyl)benzamide**

**Compound 9**

C<sub>20</sub>H<sub>15</sub>F<sub>4</sub>N<sub>3</sub>O<sub>4</sub>S

Mol. Weight: 469.42 g mol<sup>-1</sup>

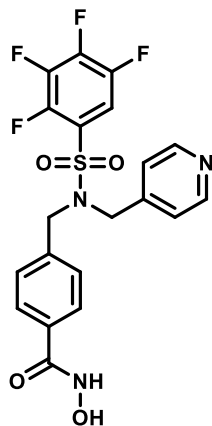

<sup>1</sup>H NMR (400 MHz, DMSO) δ 11.20 (s, 1H), 9.05 (s, 1H), 8.42 (d, *J* = 5.1 Hz, 2H), 7.82 (dddd, *J* = 9.8, 7.9, 5.9, 2.4 Hz, 1H), 7.62 (d, *J* = 8.2 Hz, 2H), 7.24 (d, *J* = 8.1 Hz, 2H), 7.18 – 7.11 (m, 2H), 4.55 (d, *J* = 4.1 Hz, 4H).

<sup>19</sup>F NMR (376 MHz, DMSO) δ -134.2 (ddt, *J* = 27.3, 13.4, 7.1 Hz), -136.2 – -136.9 (m), -147.2 (qt, *J* = 25.0, 8.3 Hz), -152.1 (t, *J* = 22.1 Hz).

<sup>13</sup>C NMR (101 MHz, DMSO) δ 193.9, 163.8 (d, *J* = 54.8 Hz), 160.0, 151.6, 149.8, 149.5, 145.9, 138.9, 136.4, 132.6, 129.1, 128.9, 127.3, 125.4, 123.3, 113.3 (dd, *J* = 22.0, 3.4 Hz), 52.6 (d, *J* = 16.3 Hz), 52.1 – 50.1 (m), 31.2.

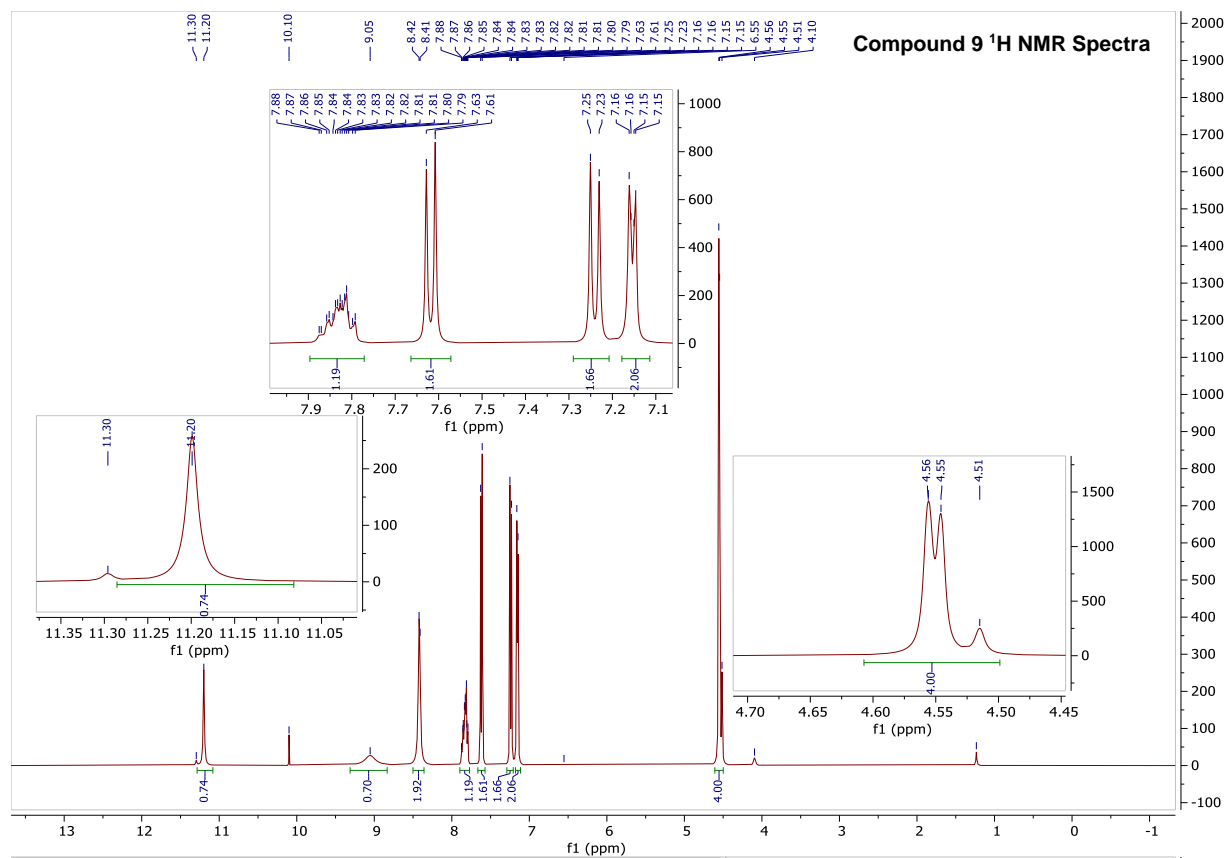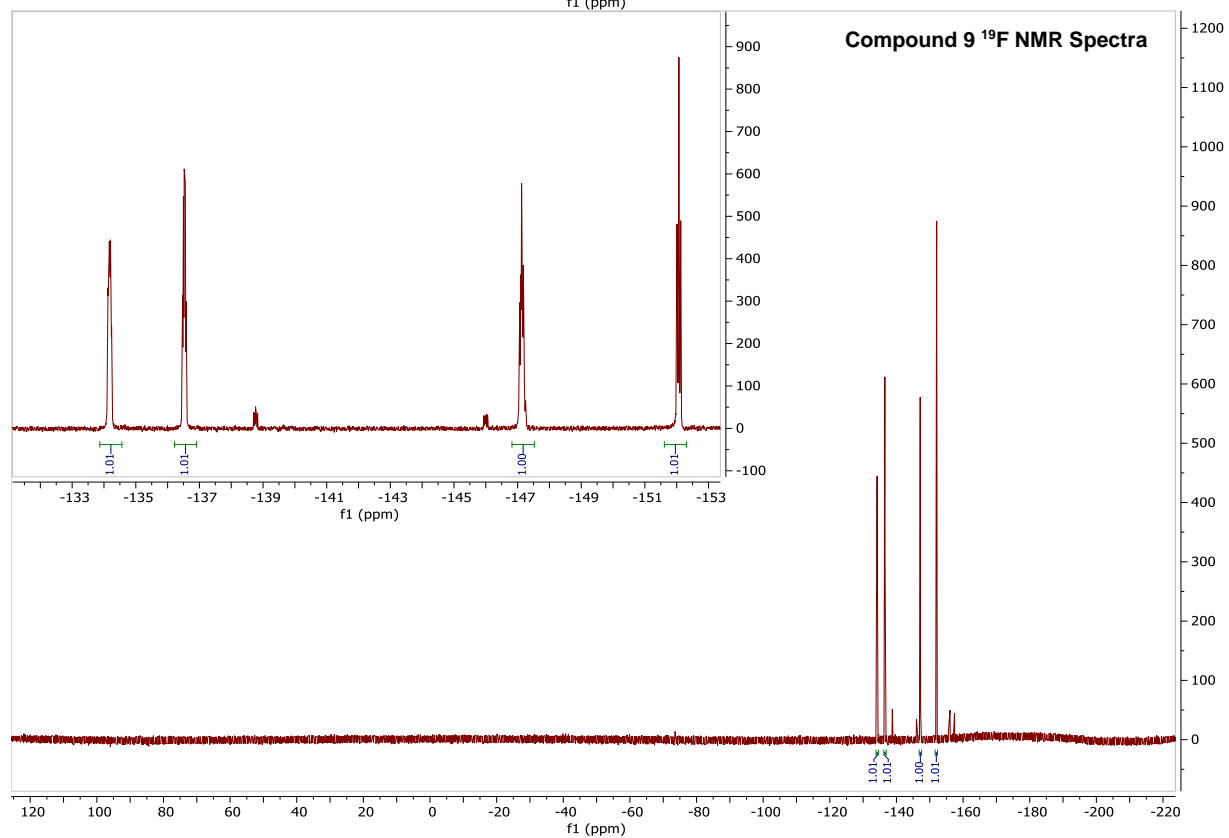

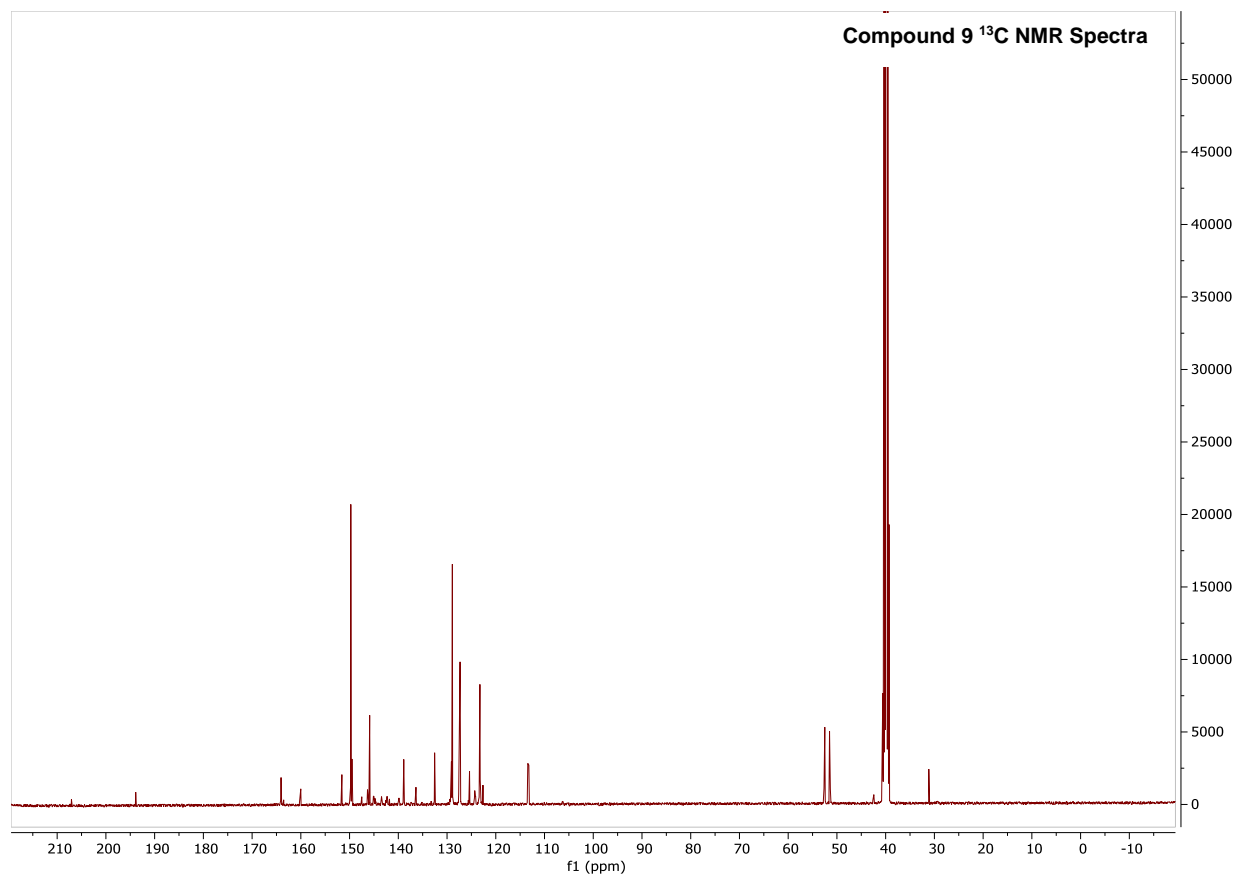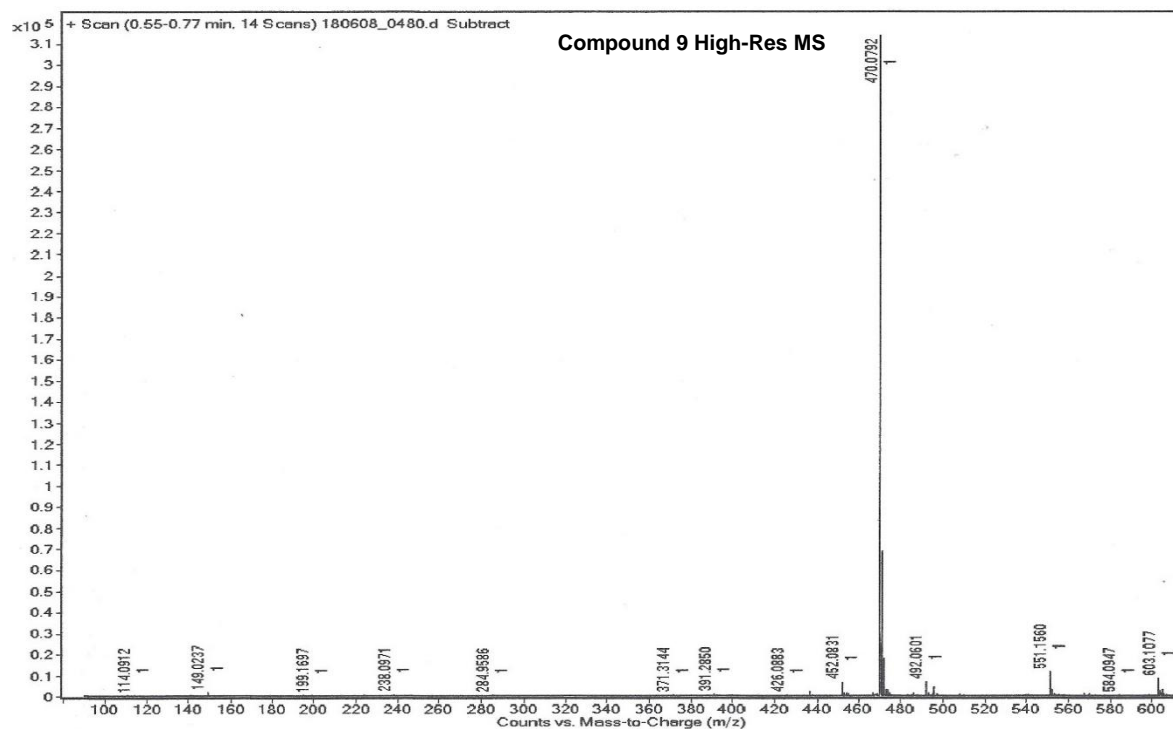

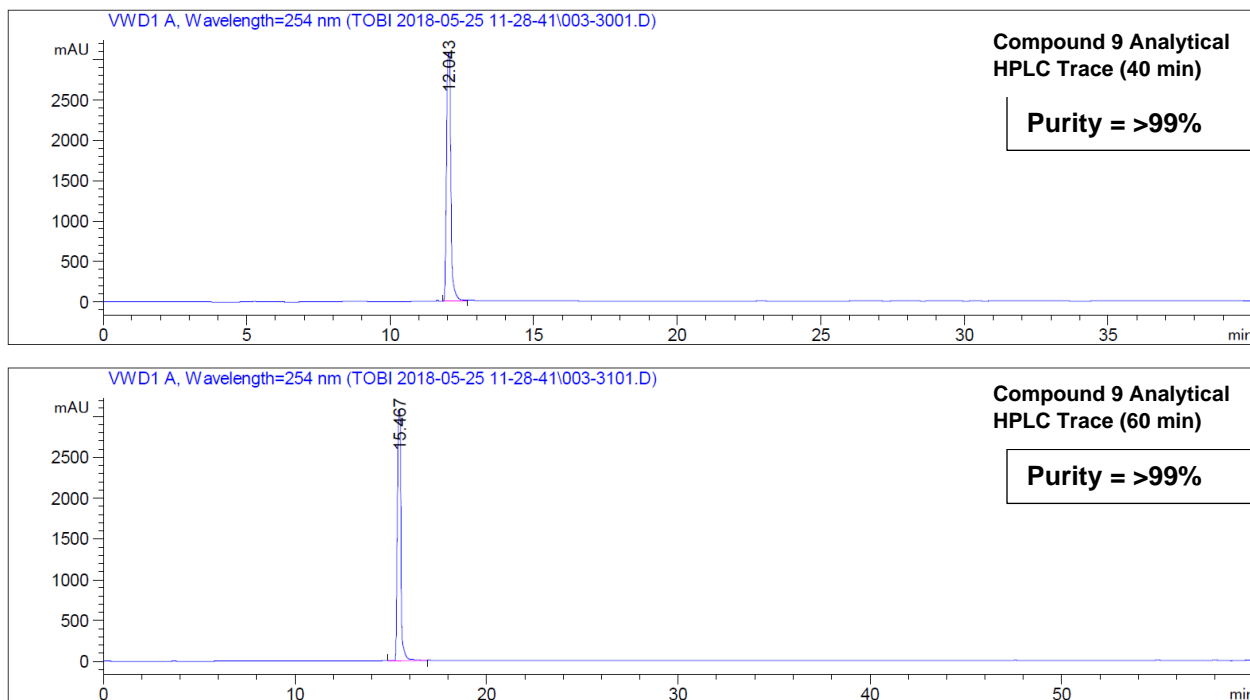

**4-(((N-benzyl-2,3,4,5-tetrafluorophenyl)sulfonamido)methyl)-N-hydroxybenzamide. Yield: 65%**

**Compound 10**

$C_{21}H_{16}F_4N_2O_4S$

Mol. Weight: 468.42  $gmol^{-1}$

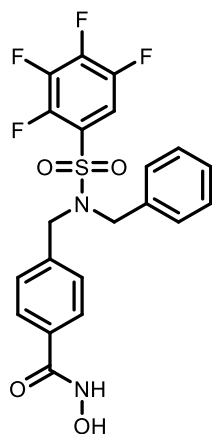

$^1H$  NMR (400 MHz, DMSO)  $\delta$  11.21 (s, 1H), 9.05 (s, 1H), 7.73 (dddd,  $J$  = 10.2, 8.1, 5.9, 2.2 Hz, 1H), 7.66 (d,  $J$  = 8.1 Hz, 2H), 7.32 – 7.19 (m, 5H), 7.17 (dd,  $J$  = 7.3, 2.2 Hz, 2H), 4.54 (s, 2H), 4.49 (s, 2H).

$^{19}F$  NMR (376 MHz, DMSO)  $\delta$  -134.5 (ddt,  $J$  = 20.2, 13.6, 7.1 Hz), -136.7 (dt,  $J$  = 22.2, 11.0 Hz), -147.6 (tt,  $J$  = 21.7, 7.9 Hz), -152.4 (t,  $J$  = 22.0 Hz).

$^{13}C$  NMR (101 MHz, DMSO)  $\delta$  164.2, 147.4 (d,  $J$  = 9.9 Hz), 145.8 (d,  $J$  = 11.6 Hz), 145.0 (d,  $J$  = 10.2 Hz), 144.6 (t,  $J$  = 15.0 Hz), 143.2 (d,  $J$  = 11.7 Hz), 142.1 (dt,  $J$  = 27.0, 13.3 Hz), 139.8 (t,  $J$  = 14.8 Hz), 139.4, 135.8, 132.4, 128.9, 128.8, 128.5, 128.2, 127.3, 113.1 (dd,  $J$  = 22.0, 3.2 Hz), 52.2 (d,  $J$  = 1.9 Hz), 51.8 (d,  $J$  = 2.2 Hz).

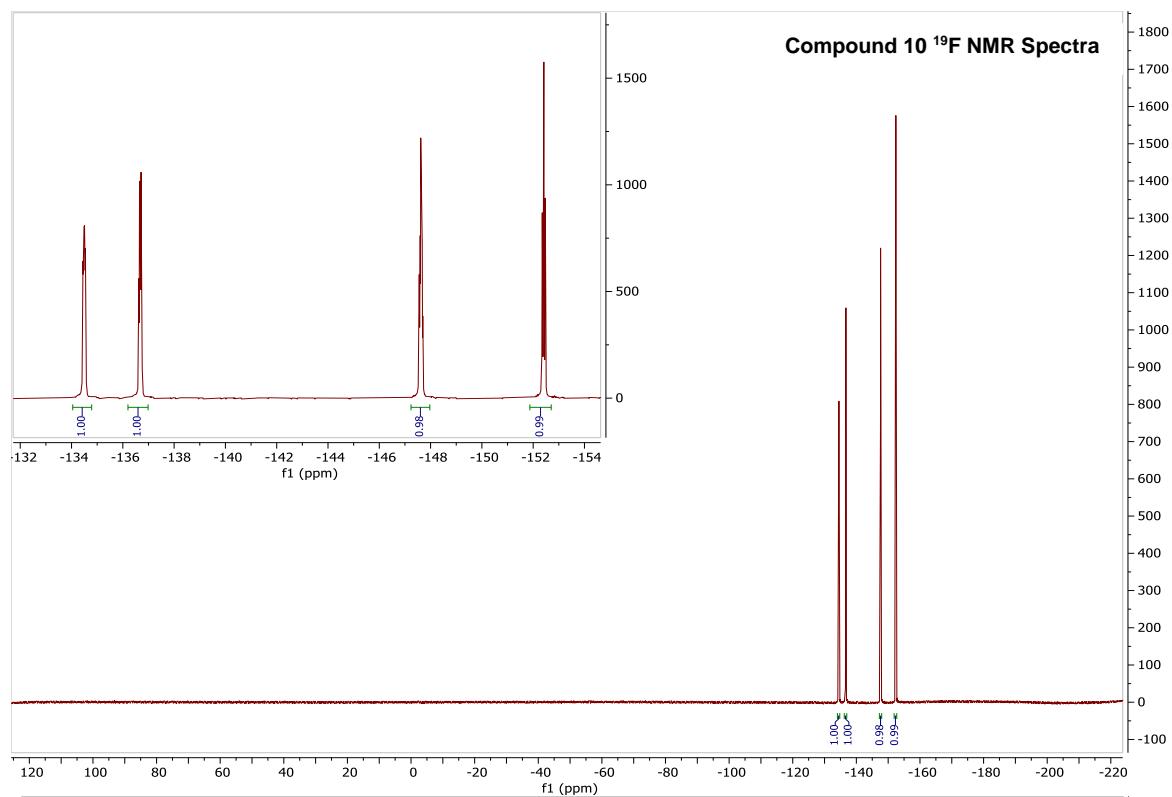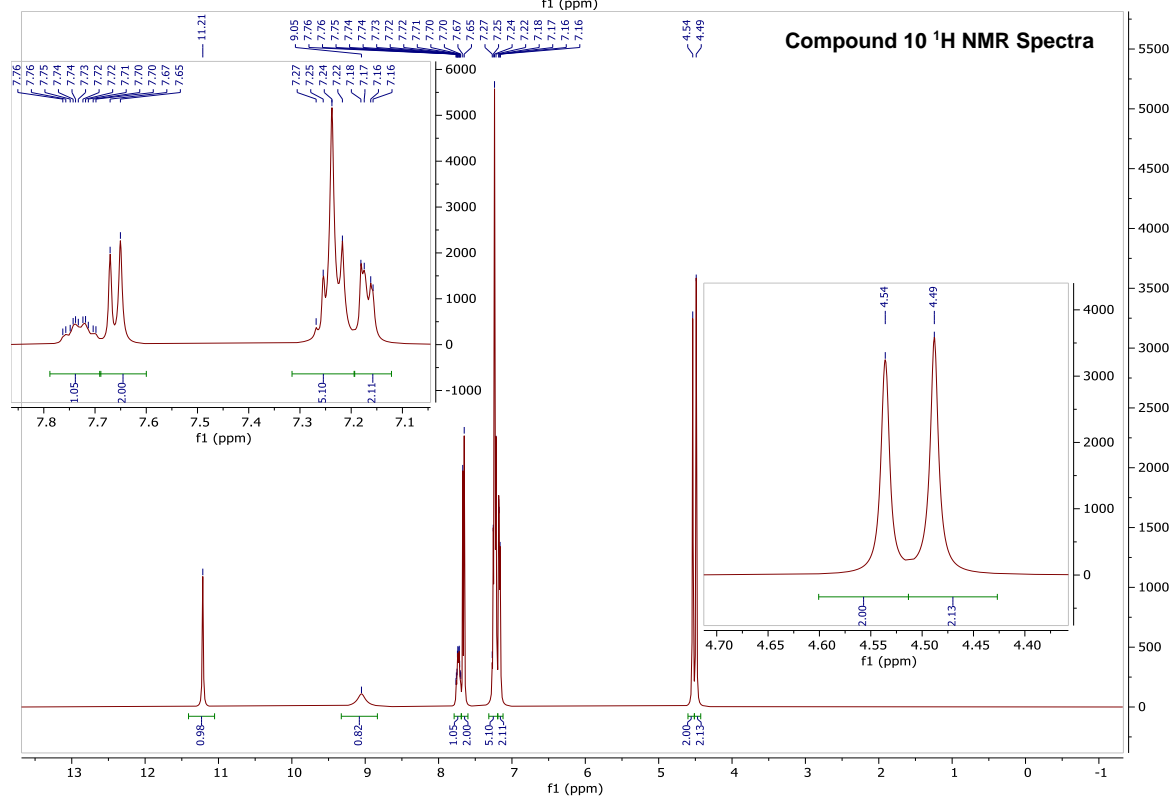



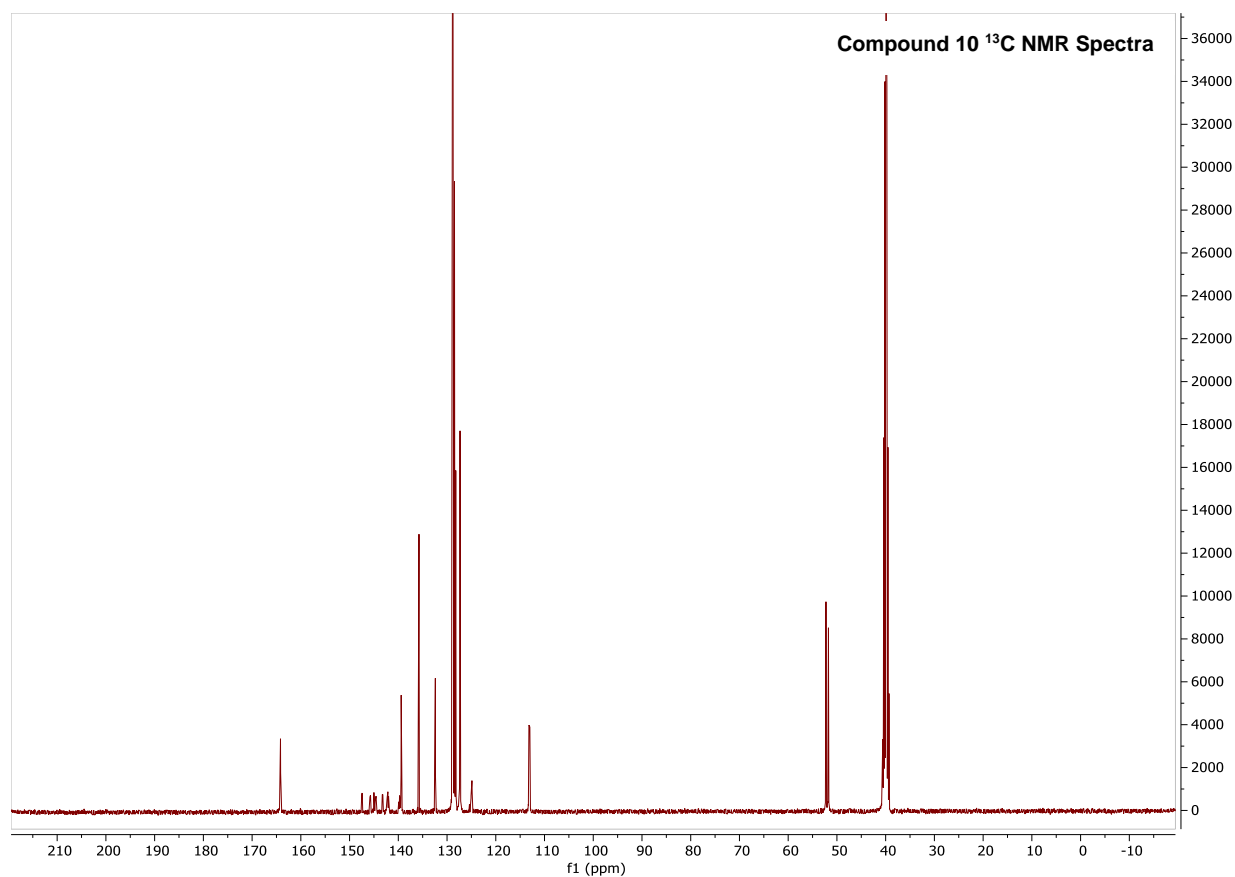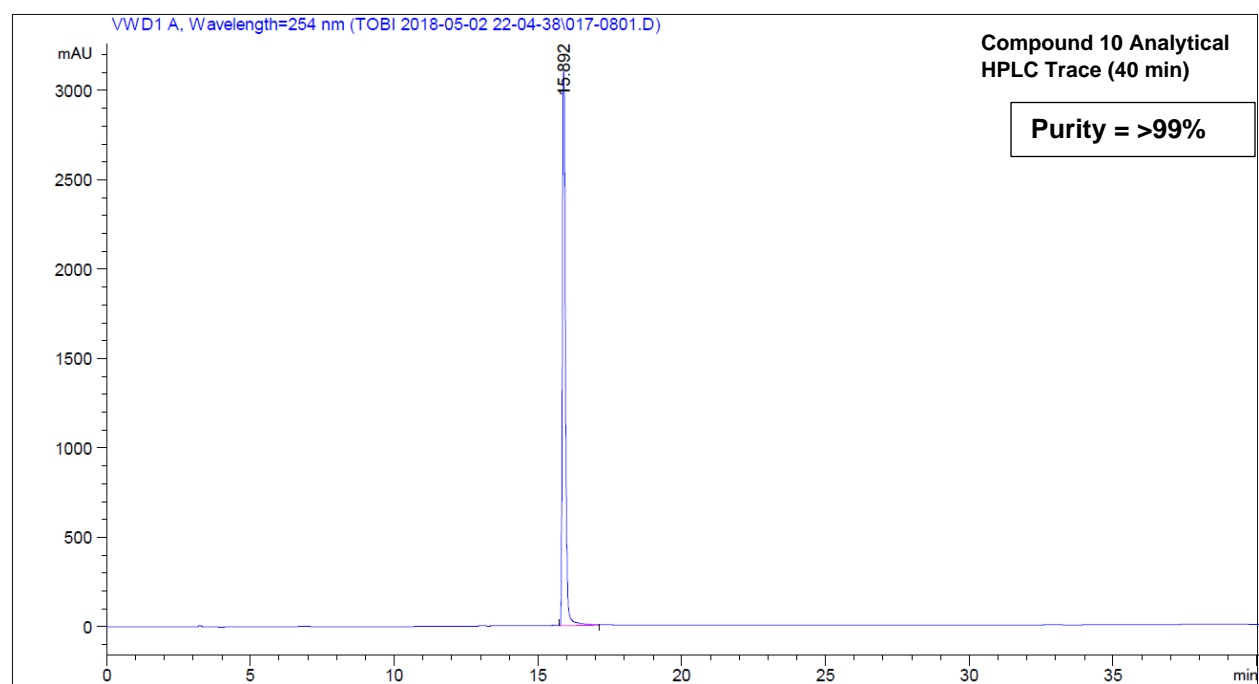

[S61]

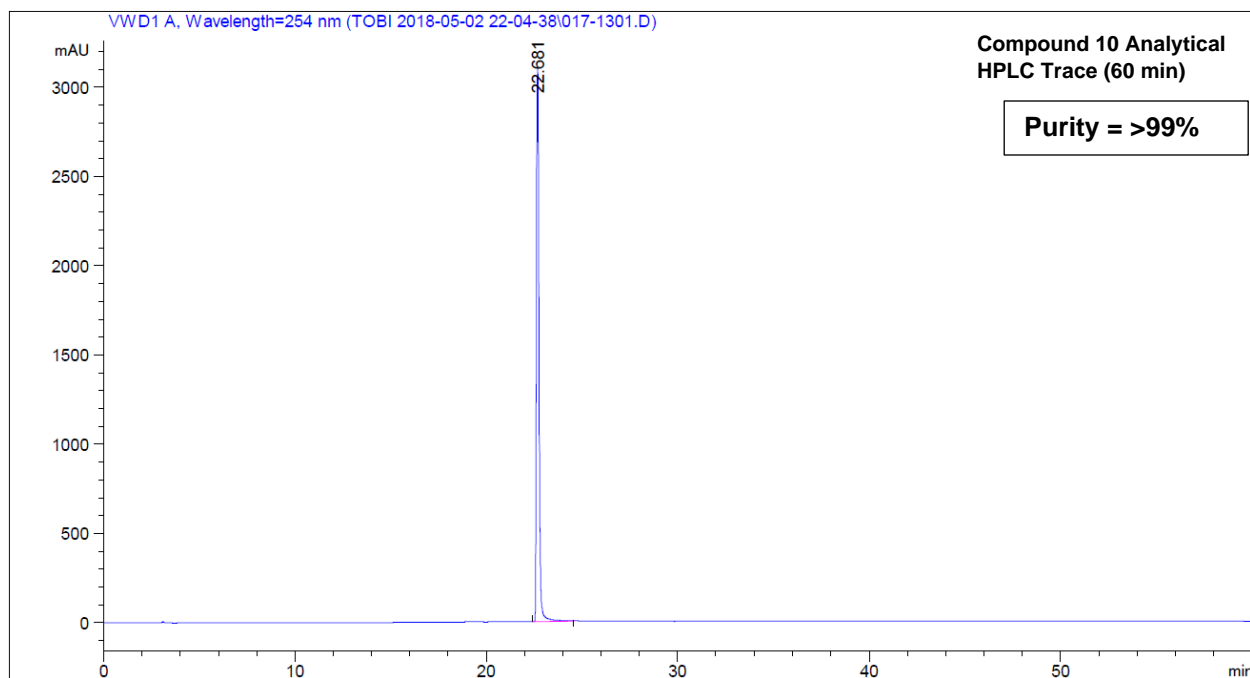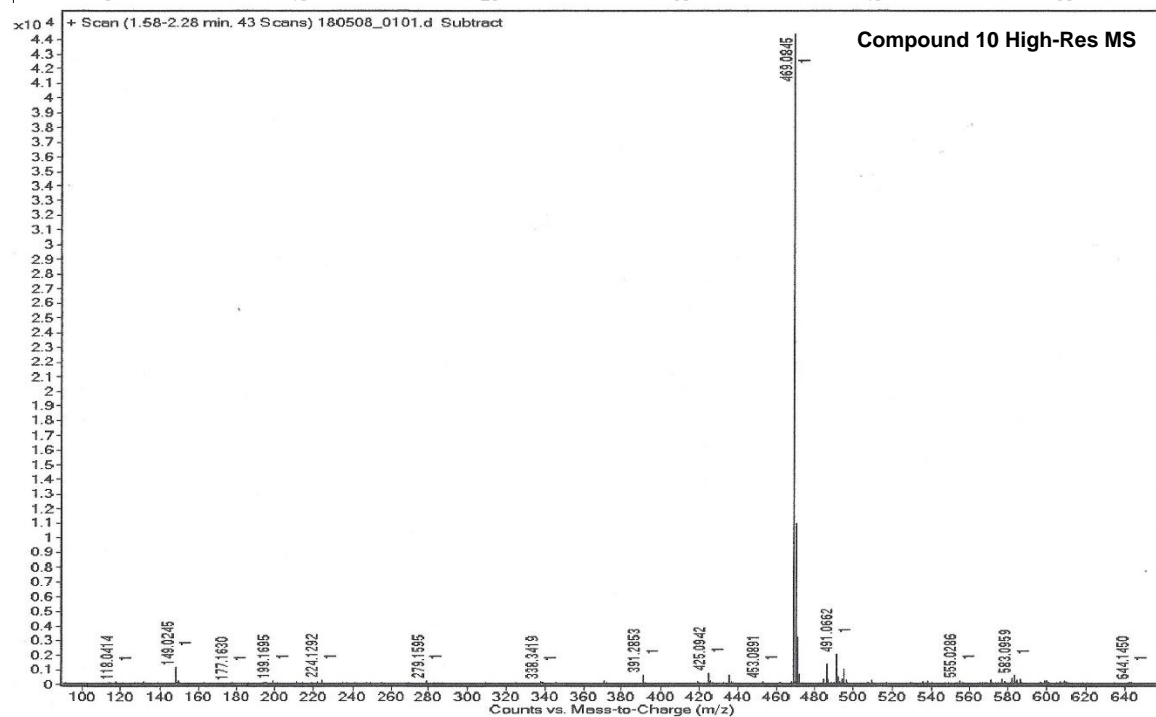

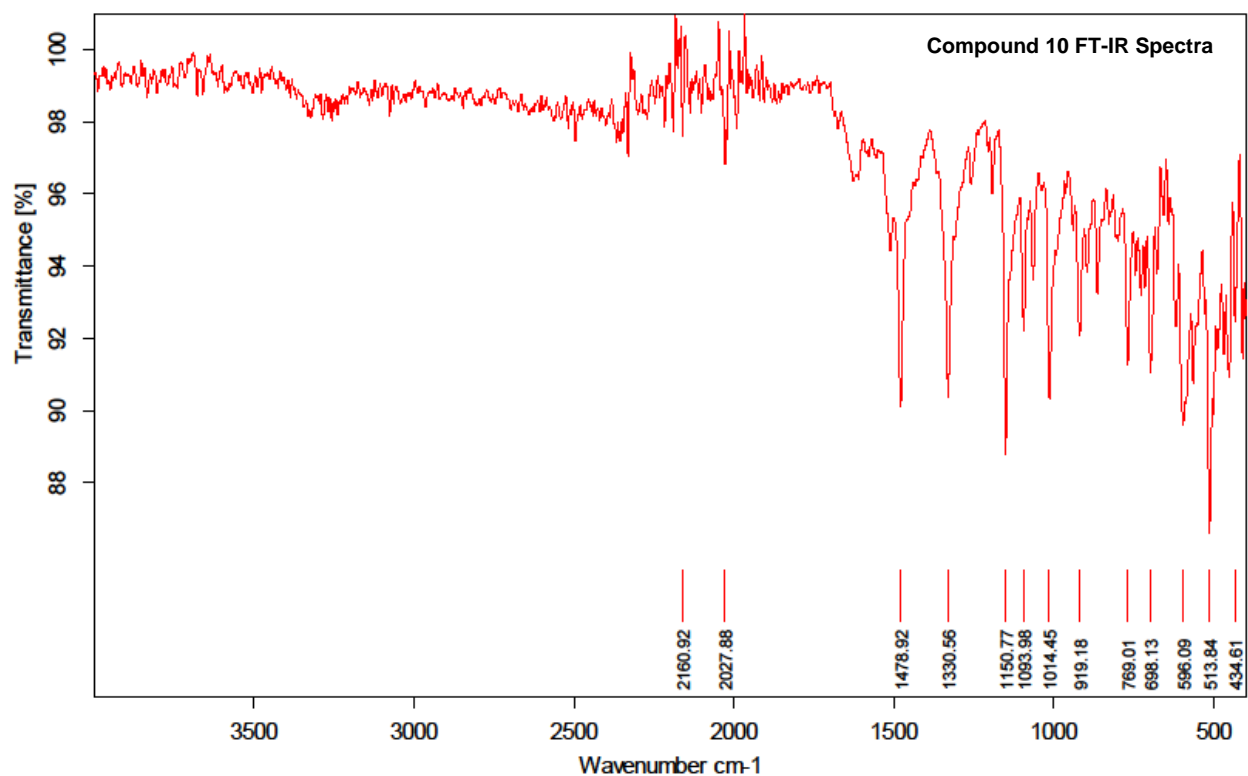

**N-hydroxy-4-(((2,3,4,5-tetrafluoro-N-(4-fluorobenzyl)phenyl)sulfonamido)methyl)benzamide. Yield: 59%**

**Compound 11**

C<sub>21</sub>H<sub>15</sub>F<sub>5</sub>N<sub>2</sub>O<sub>4</sub>S

Mol. Weight: 486.41 gmol<sup>-1</sup>

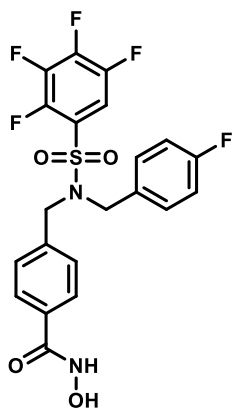

<sup>1</sup>H NMR (400 MHz, DMSO) δ 11.20 (s, 1H), 9.05 (s, 1H), 7.79 – 7.69 (m, 1H), 7.65 – 7.52 (m, 2H), 7.23 – 7.11 (m, 4H), 7.10 – 7.00 (m, 2H), 4.51 (s, 2H), 4.46 (s, 2H).

<sup>13</sup>C NMR (101 MHz, DMSO) δ 160.9, 132.2, 131.1, 131.0, 128.7, 128.5, 127.3, 125.4, 115.7, 115.5, 113.3, 113.1, 51.9, 51.7.

<sup>19</sup>F NMR (376 MHz, DMSO) δ -114.5 (ddt, *J* = 14.7, 9.1, 5.0 Hz), -134.4 (ddt, *J* = 27.5, 13.5, 7.2 Hz), -136.6 (dtd, *J* = 23.4, 11.7, 10.4, 3.5 Hz), -147.4 (tt, *J* = 21.5, 8.1 Hz), -152.2 (t, *J* = 21.8 Hz).

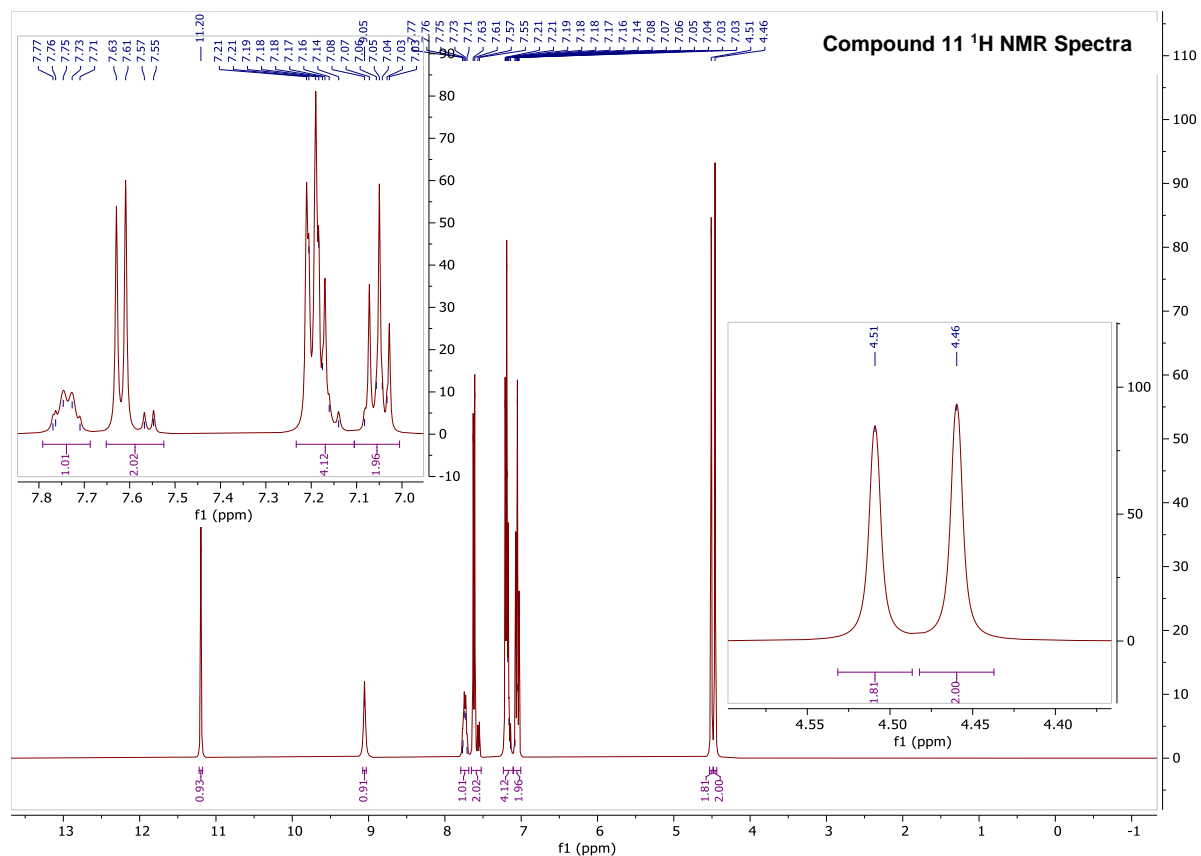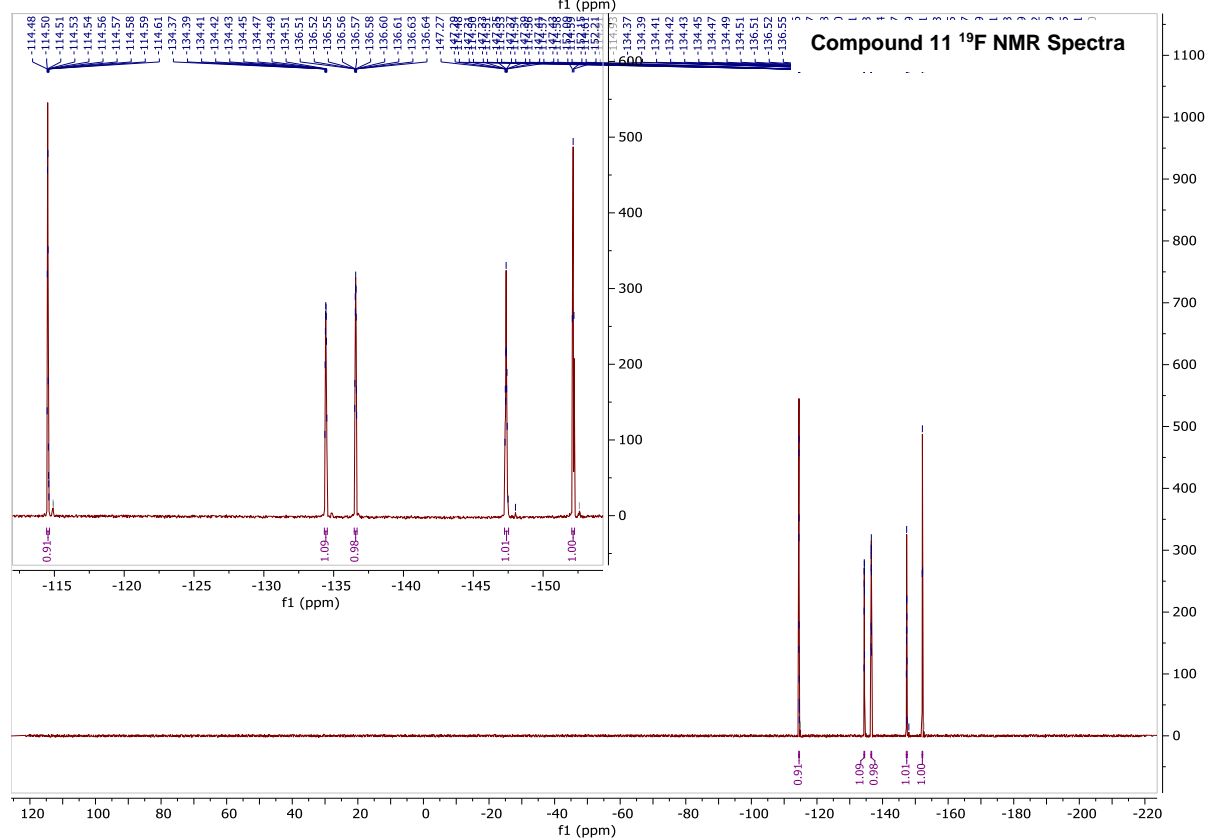

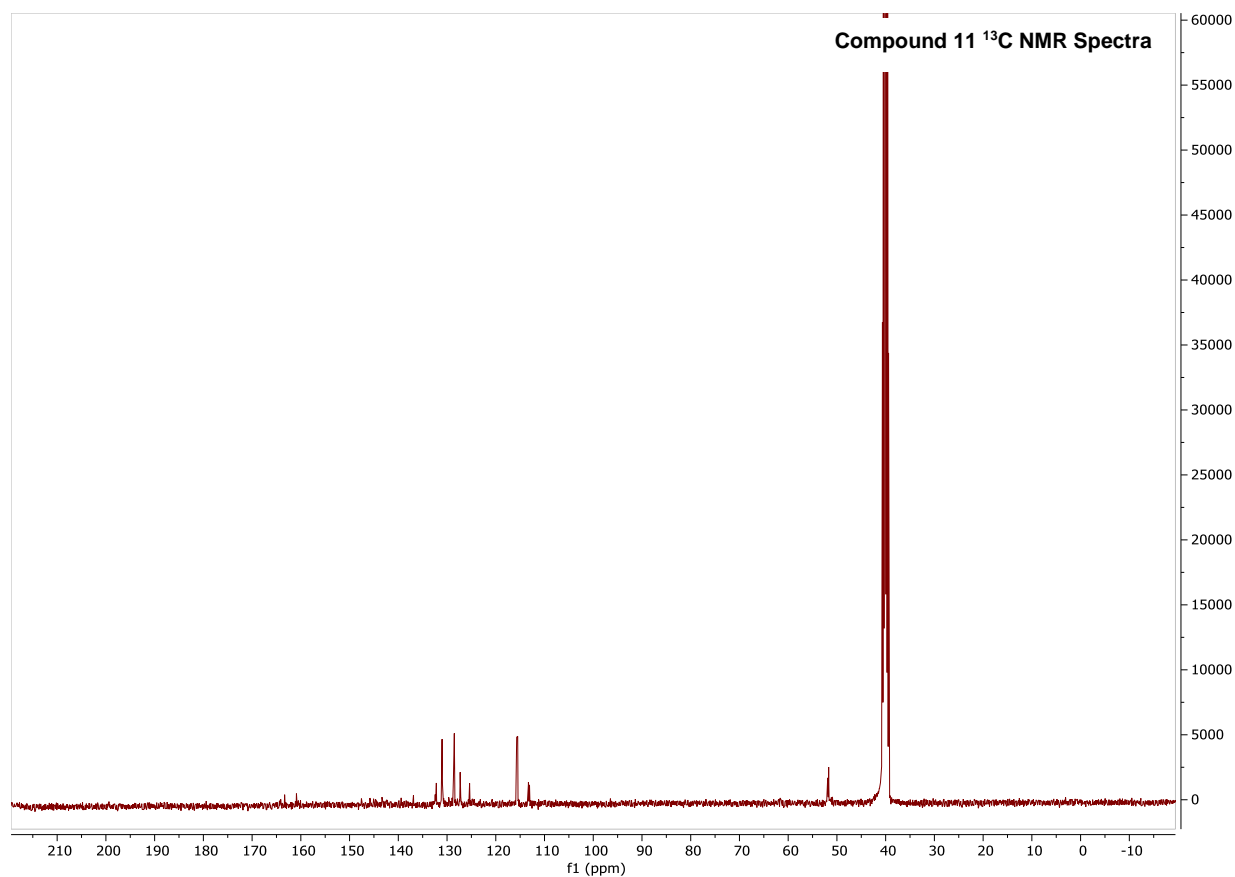

Compound 11 High-Res MS

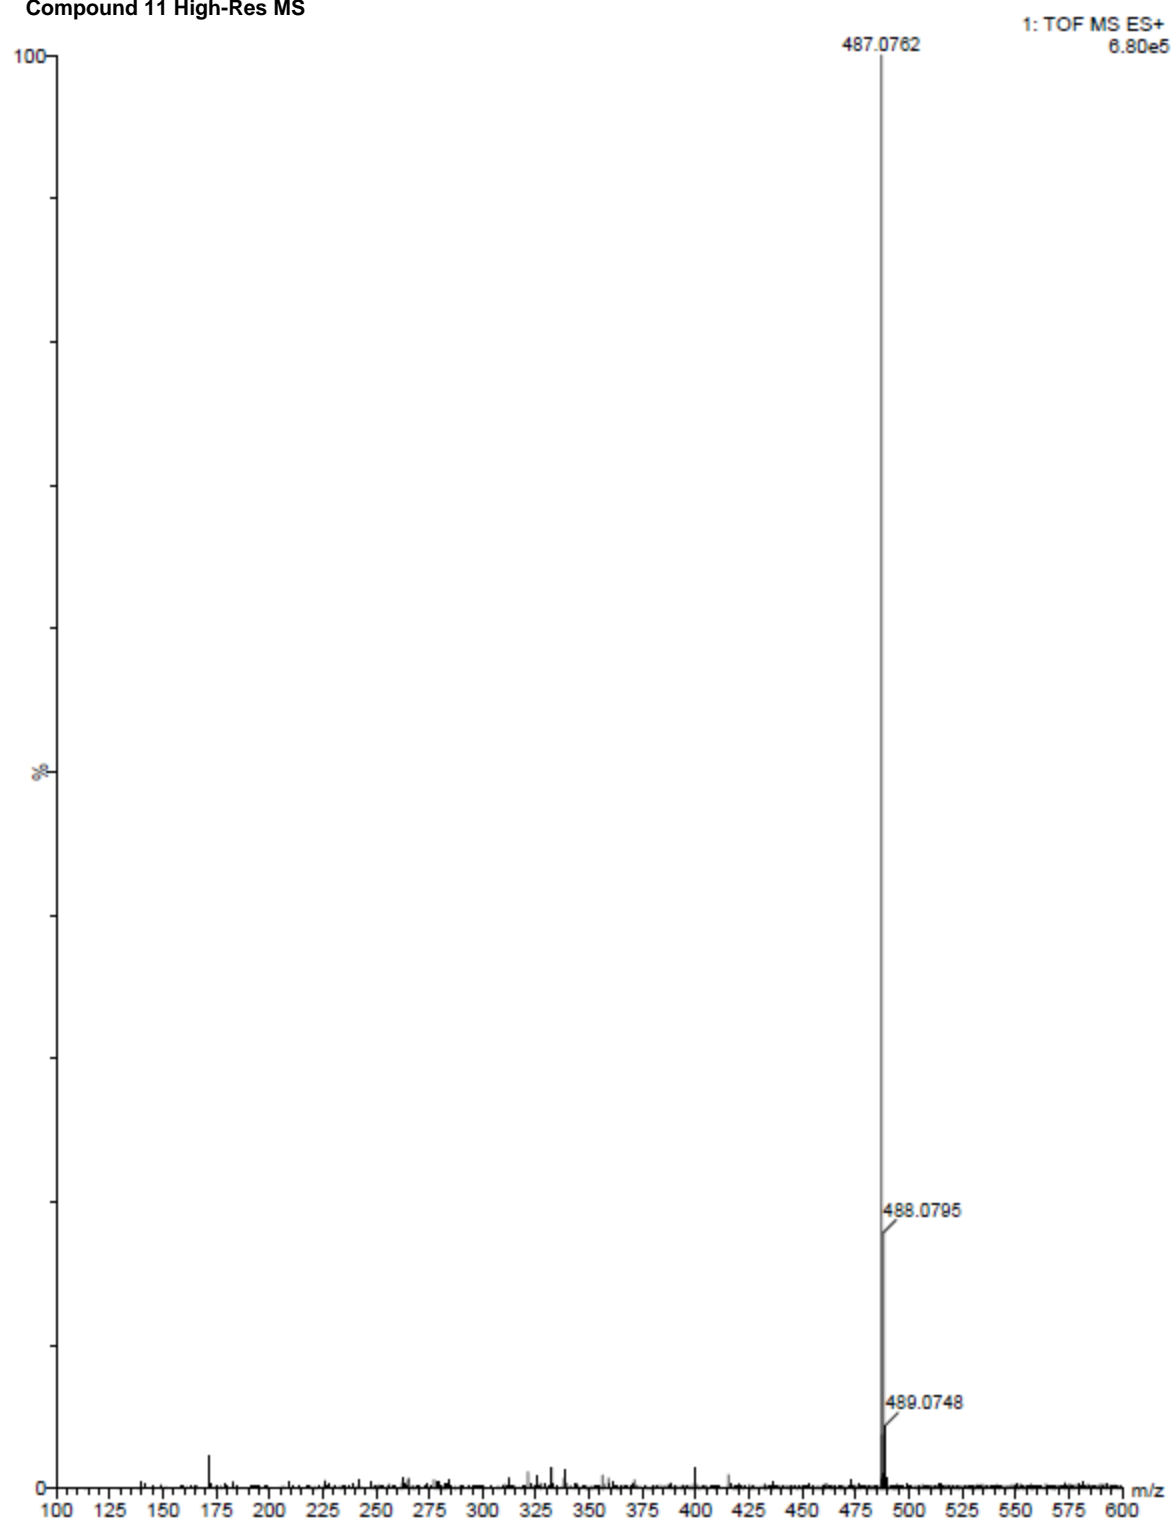

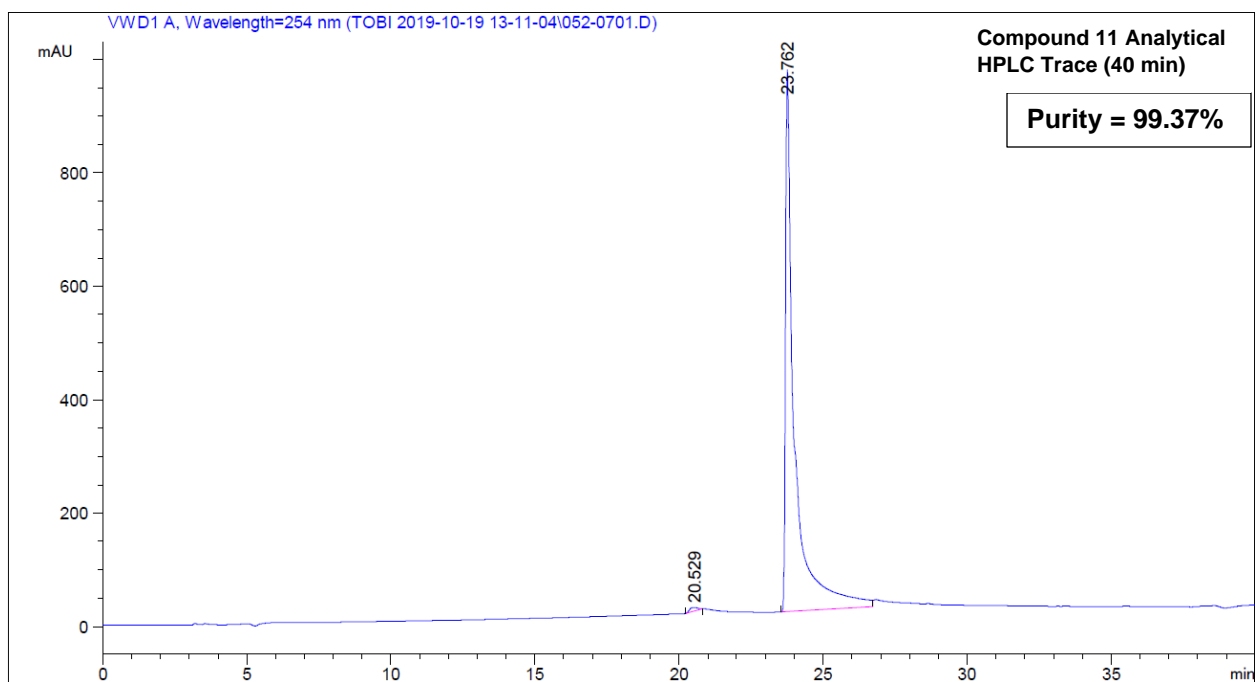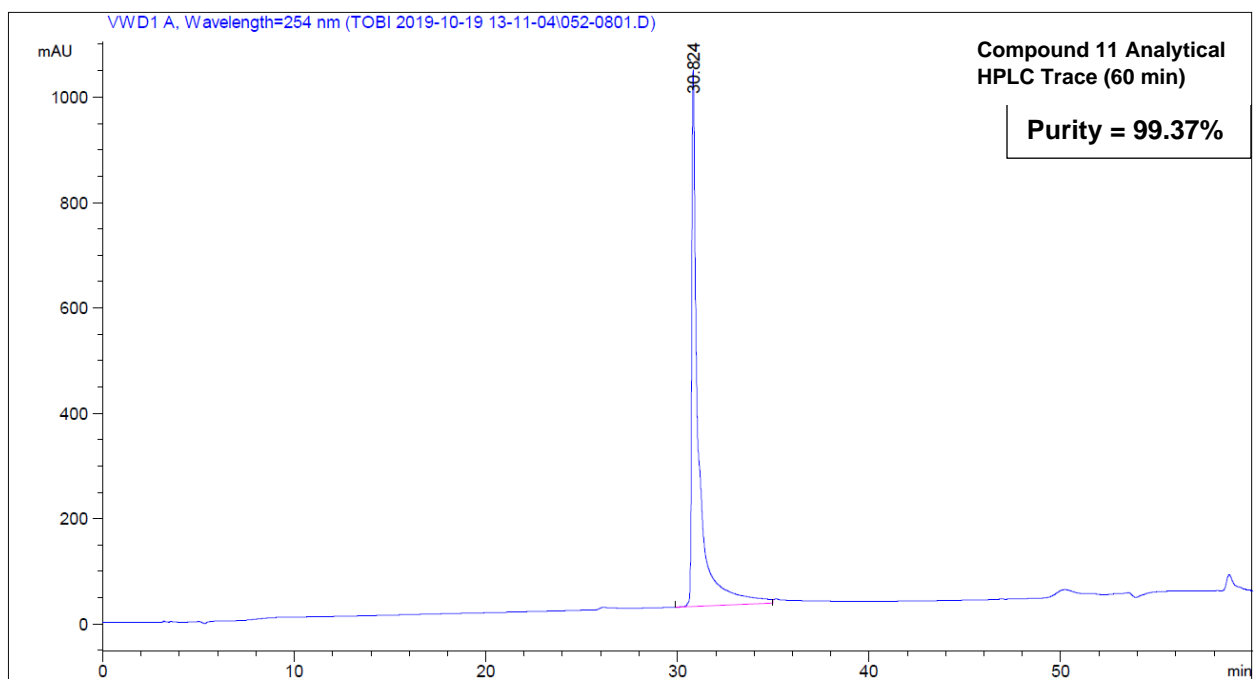

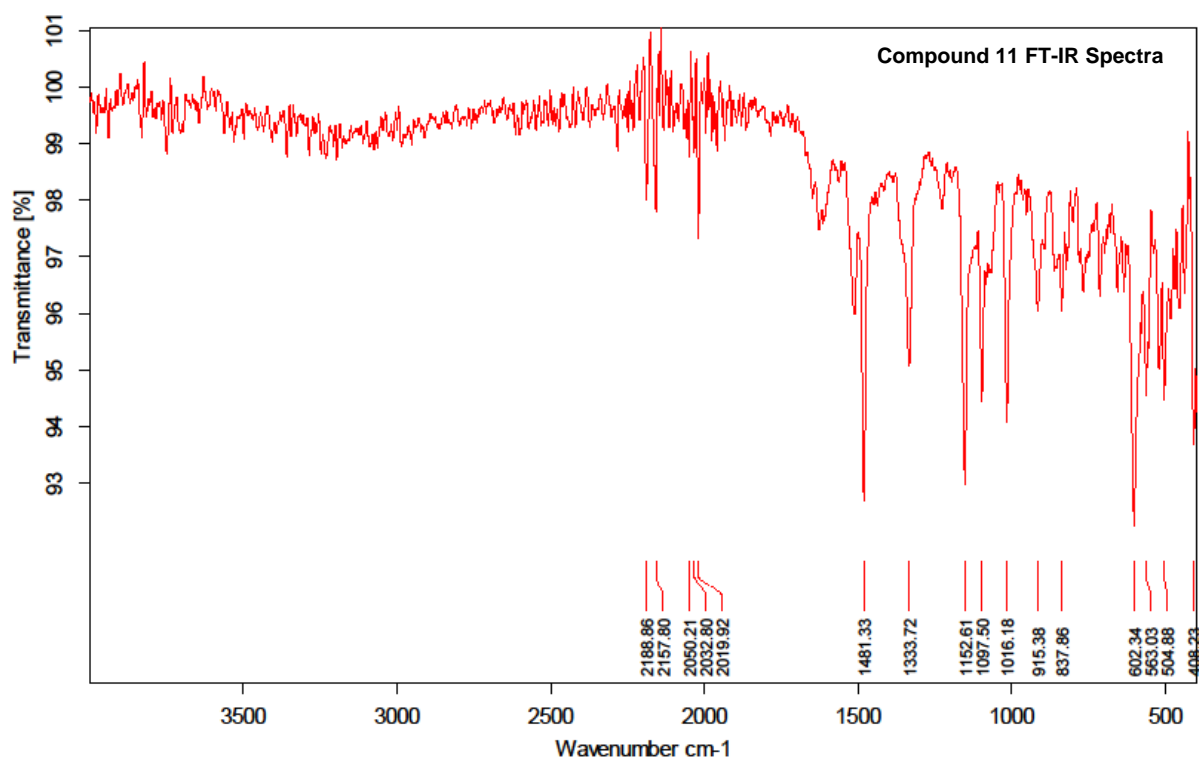

**N-hydroxy-4-(((2,3,4,5-tetrafluoro-N-(3-fluorobenzyl)phenyl)sulfonamido)methyl)benzamide. Yield: 62%**

**Compound 12**

$C_{21}H_{15}F_5N_2O_4S$

Mol. Weight: 486.41  $gmol^{-1}$

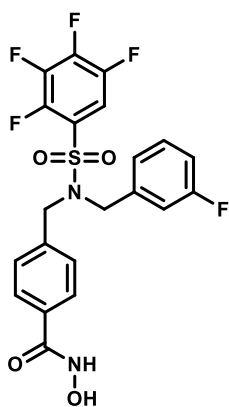

$^1H$  NMR (400 MHz,  $CD_3CN$ )  $\delta$  10.05 – 9.59 (m, 1H), 7.65 – 7.54 (m, 3H), 7.31 – 7.21 (m, 3H), 6.99 (dd,  $J$  = 8.2, 2.0 Hz, 2H), 6.91 (dt,  $J$  = 10.1, 2.1 Hz, 1H), 4.54 (s, 2H), 4.49 (s, 2H).

$^{19}F$  NMR (376 MHz,  $CD_3CN$ )  $\delta$  -114.4 – -115.0 (m), -135.2 (ddq,  $J$  = 21.0, 14.0, 7.2 Hz), -137.8 – -138.5 (m), -149.1 (ddd,  $J$  = 27.3, 18.7, 8.2 Hz), -153.3 – -154.2 (m).

$^{13}C$  NMR (101 MHz,  $CD_3CN$ )  $\delta$  163.8, 161.4, 139.6, 138.5 (d,  $J$  = 7.1 Hz), 131.1, 130.3 (d,  $J$  = 8.4 Hz), 128.6, 127.0, 124.4 (d,  $J$  = 2.8 Hz), 117.3, 115.1 (d,  $J$  = 22.0 Hz), 114.5 (d,  $J$  = 21.3 Hz), 112.7 (d,  $J$  = 22.0 Hz), 53.0 – 50.6 (m).



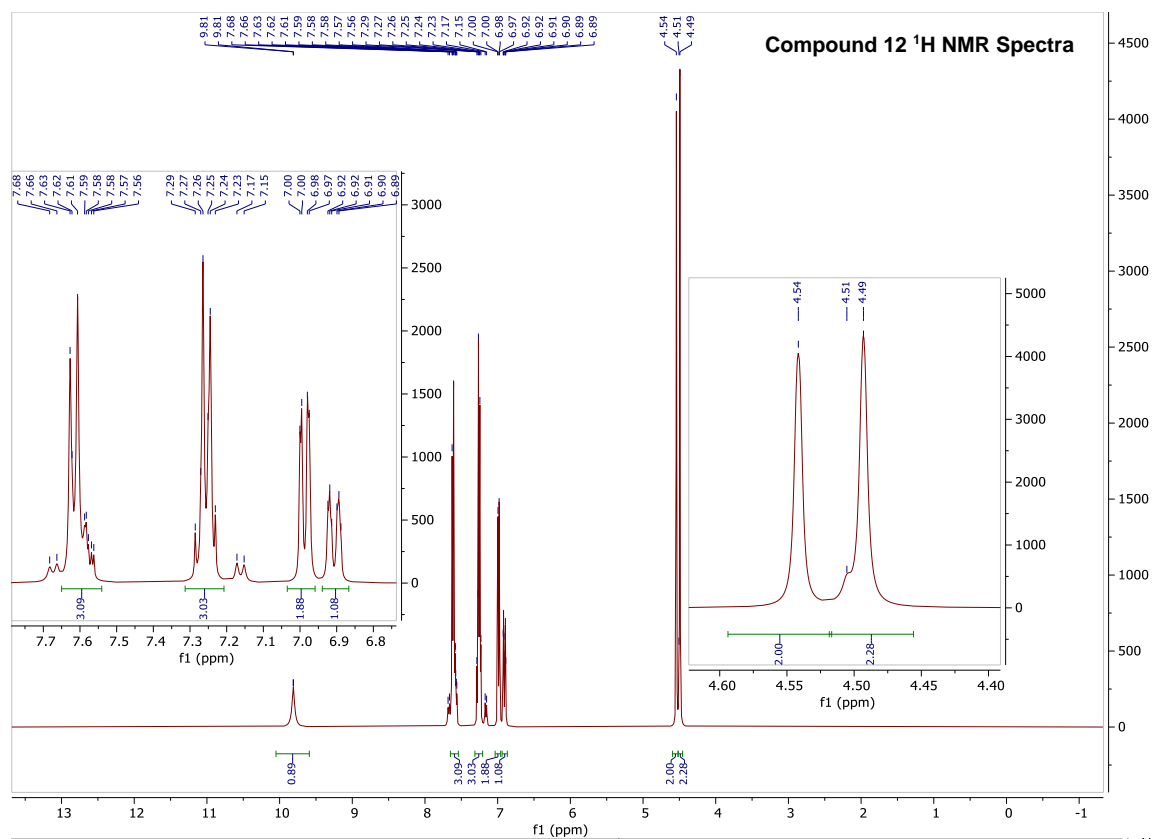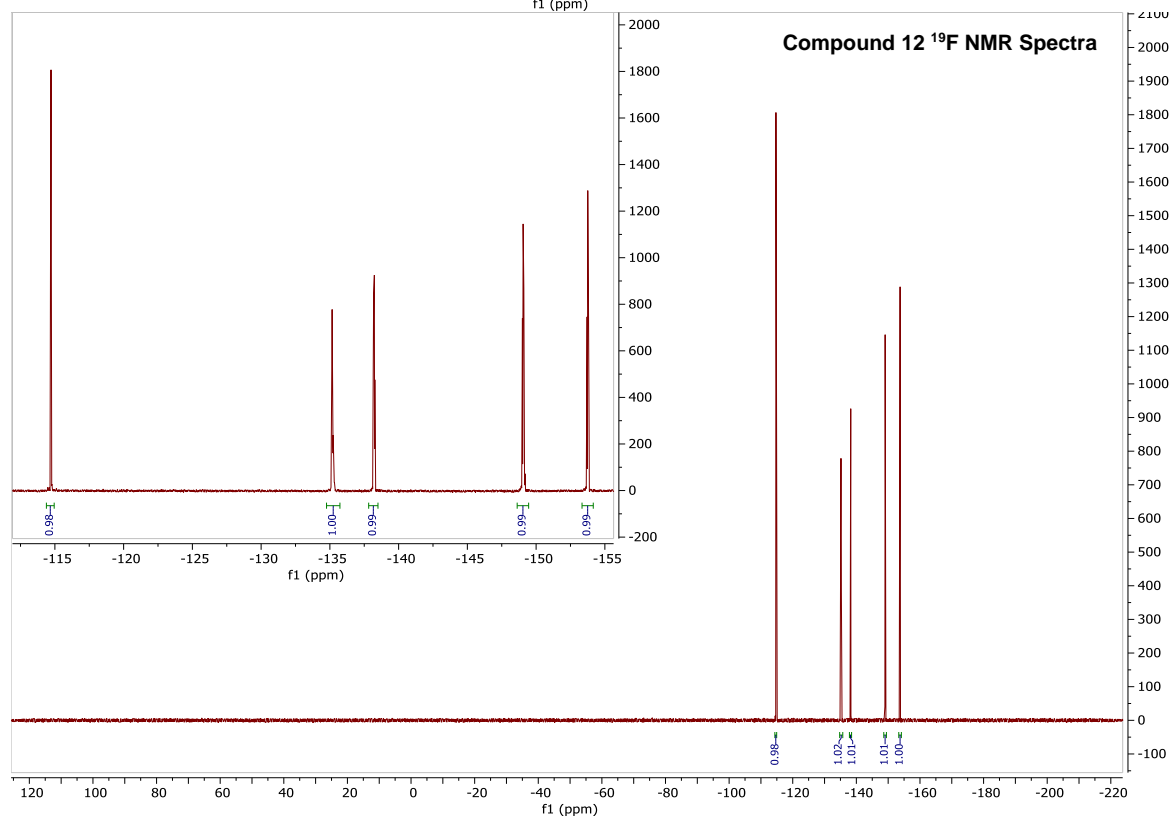

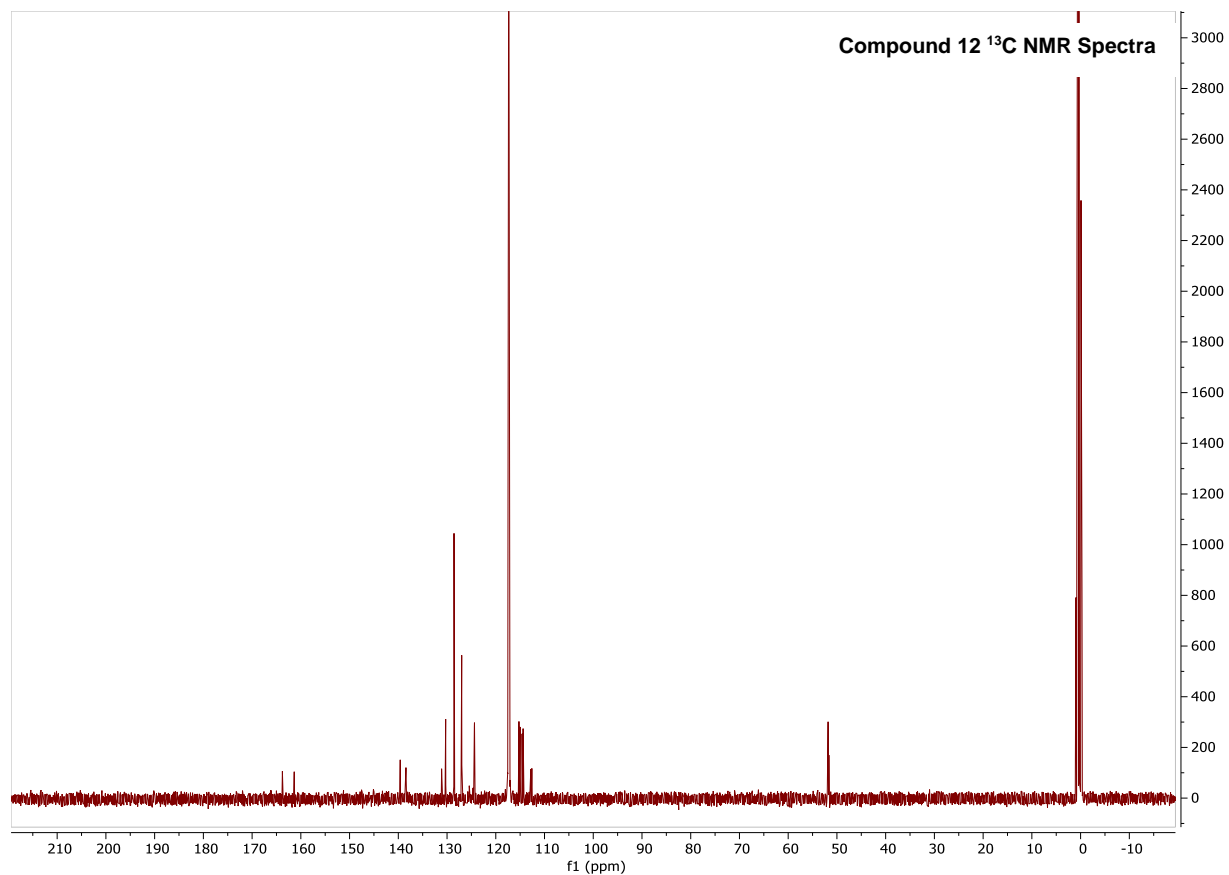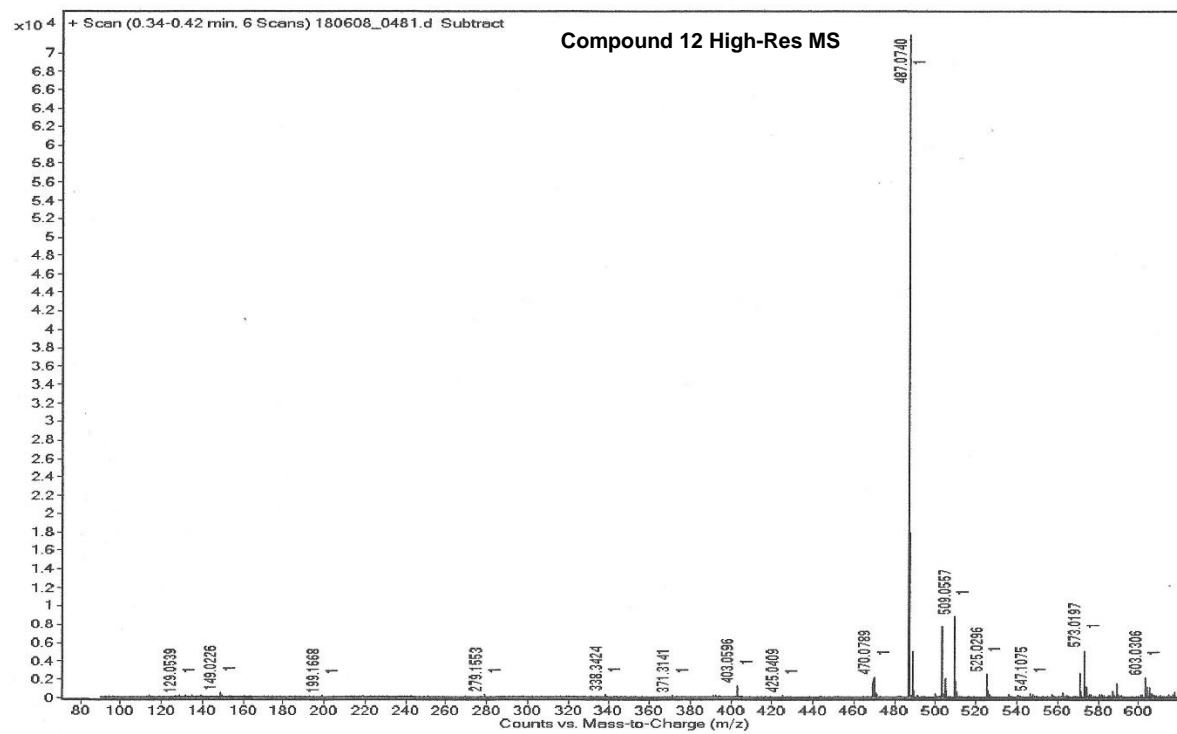

[S70]

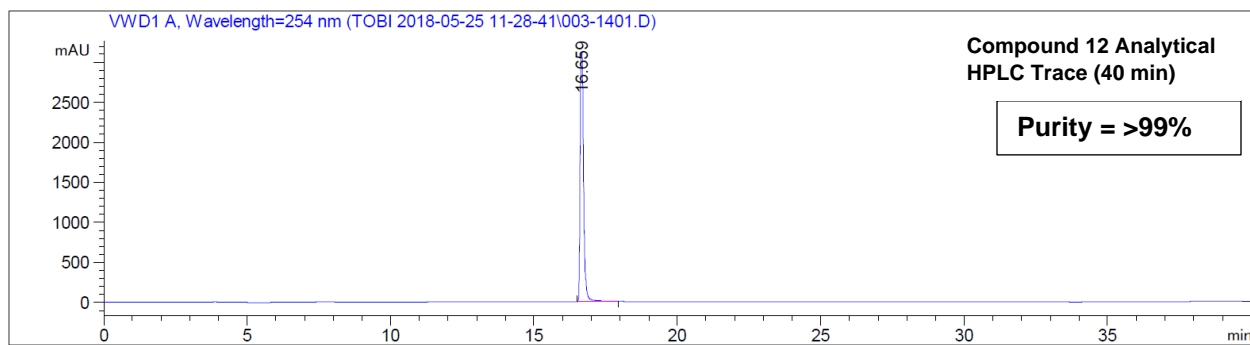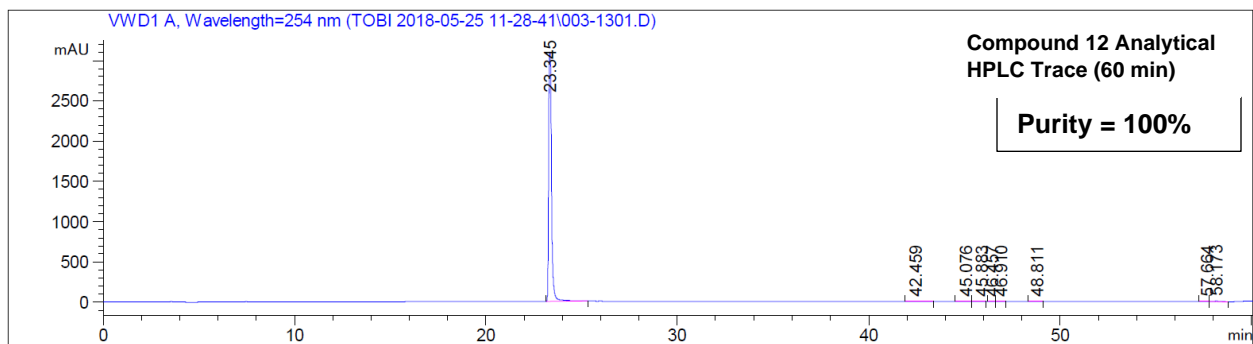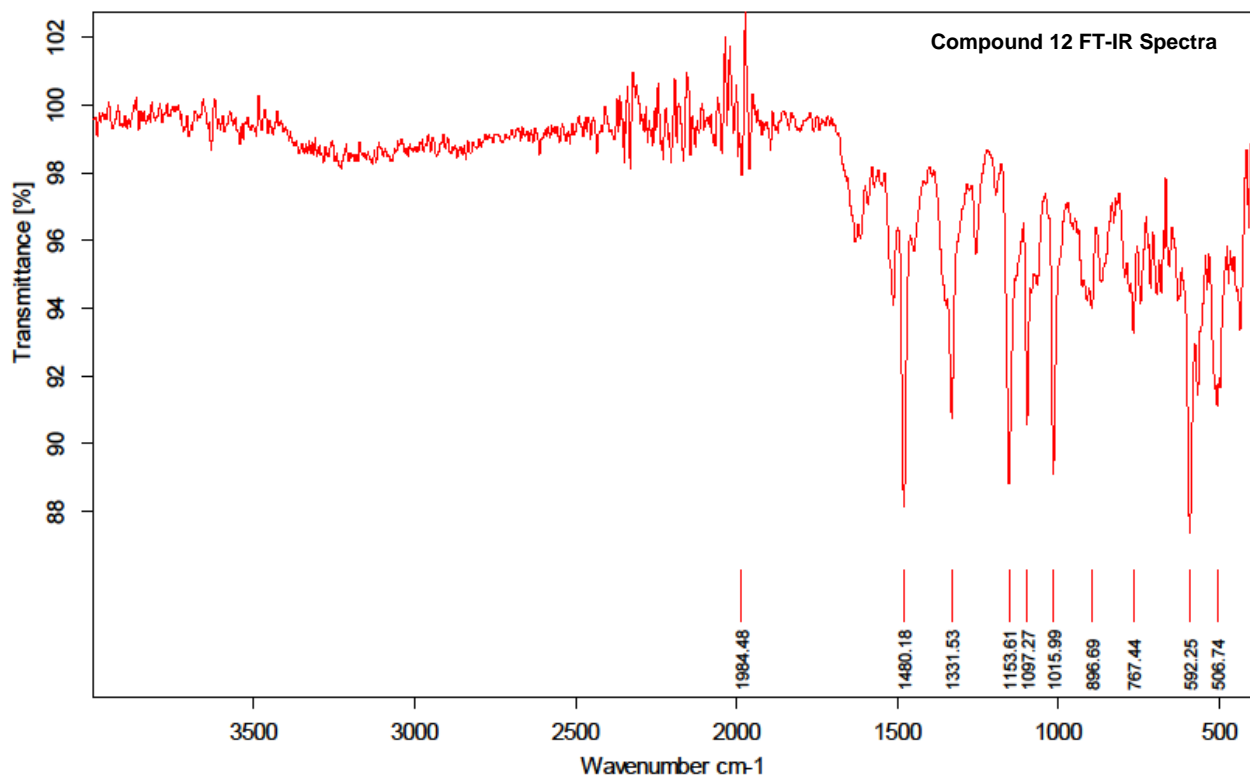

**N-hydroxy-4-(((2,3,4,5-tetrafluoro-N-(2-fluorobenzyl)phenyl)sulfonamido)methyl)benzamide. Yield: 57%**

**Compound 13**

$C_{21}H_{15}F_5N_2O_4S$

Mol. Weight: 486.41  $g\text{mol}^{-1}$

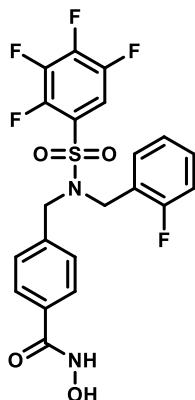

$^1\text{H}$  NMR (400 MHz, DMSO)  $\delta$  11.21 (s, 1H), 9.04 (s, 1H), 7.72 (dddd,  $J = 17.8, 10.1, 4.9, 2.0$  Hz, 1H), 7.67 – 7.53 (m, 2H), 7.32 – 7.16 (m, 4H), 7.11 – 6.96 (m, 2H), 4.55 (d,  $J = 13.9$  Hz, 4H).

$^{19}\text{F}$  NMR (376 MHz, DMSO)  $\delta$  -117.3 (ddt,  $J = 58.6, 11.8, 6.5$  Hz), -134.5 (ddt,  $J = 20.1, 13.2, 7.1$  Hz), -136.8 (dt,  $J = 22.1, 11.2$  Hz), -147.7 (dddd,  $J = 37.3, 29.9, 21.5, 8.2$  Hz), -152.4 (t,  $J = 21.8$  Hz).

$^{13}\text{C}$  NMR (101 MHz, DMSO)  $\delta$  164.2, 162.0, 159.7, 139.6, 137.1, 132.3, 131.6, 131.6, 130.7, 130.7, 128.3, 128.1, 127.3, 125.3, 124.8, 124.8, 122.7, 122.6, 115.7, 115.5, 113.2, 113.0, 52.2, 46.4.

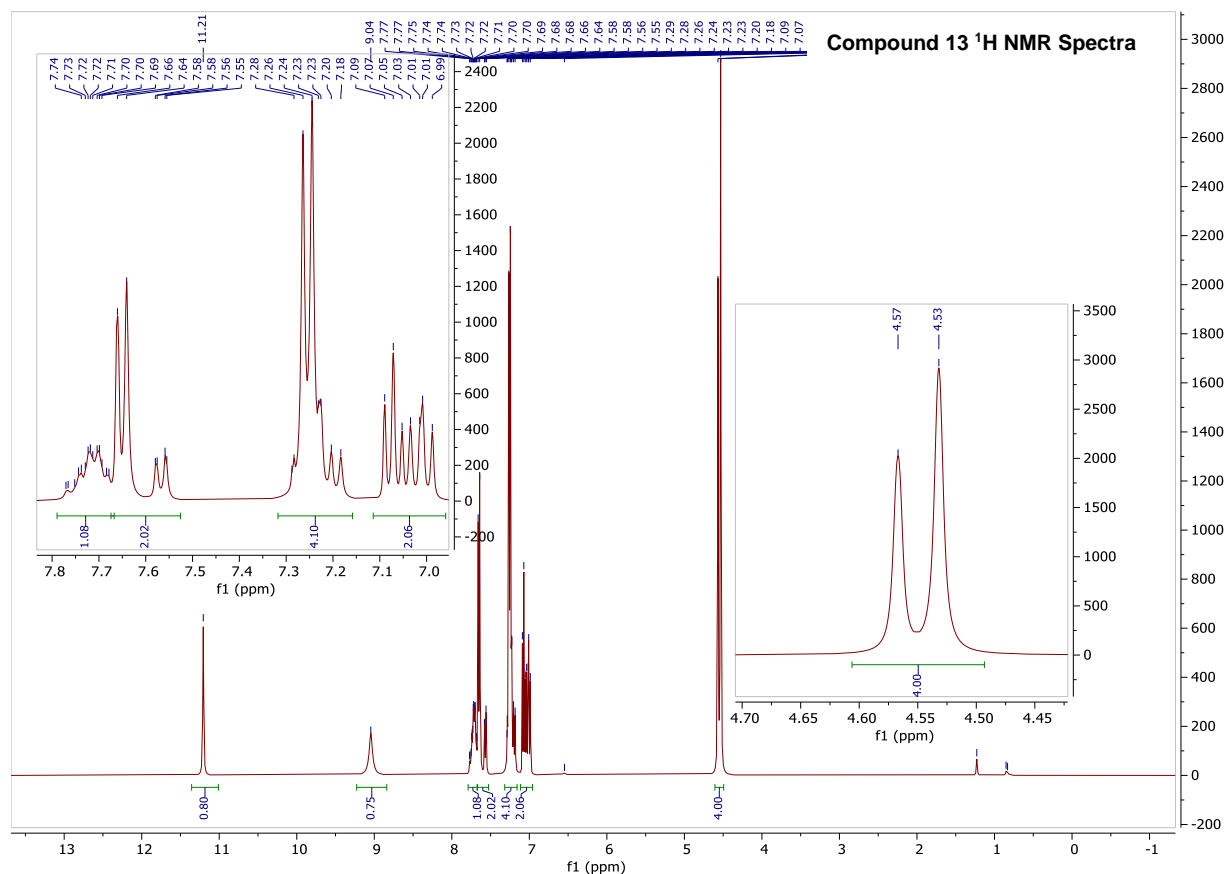

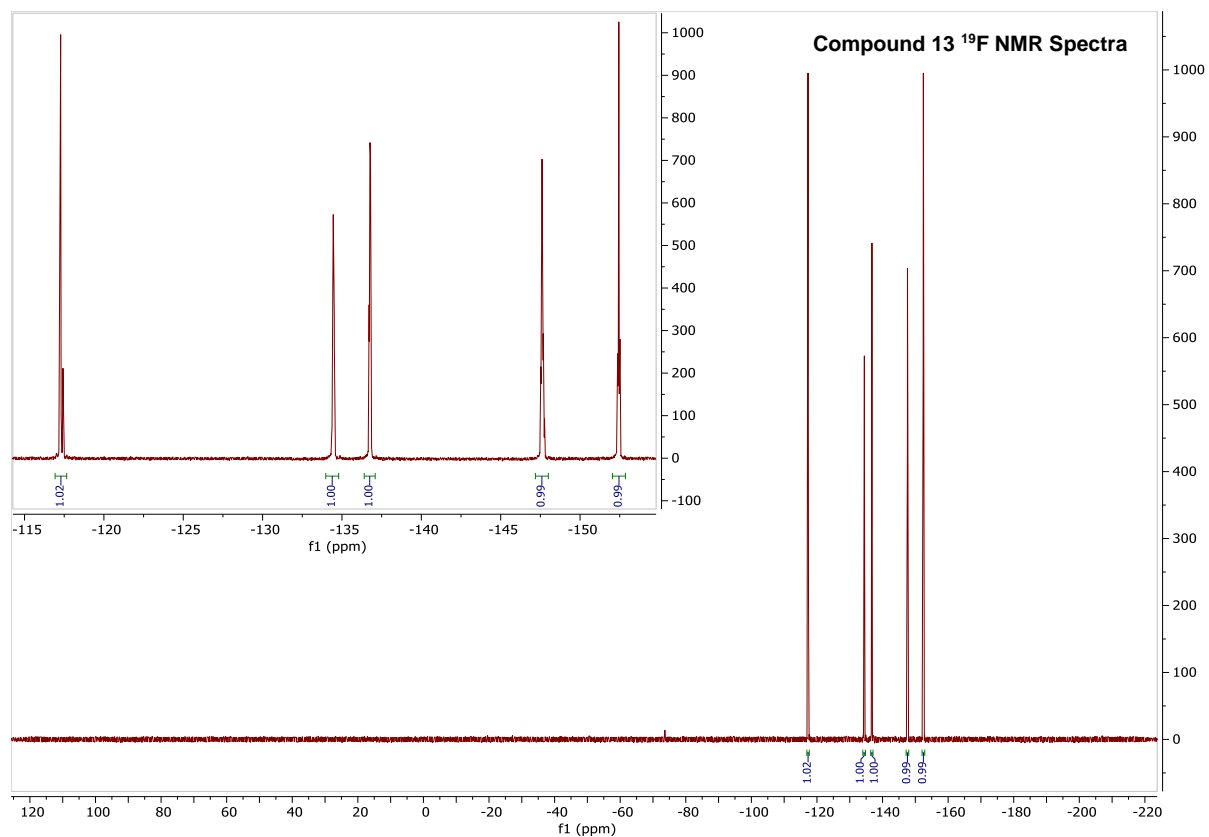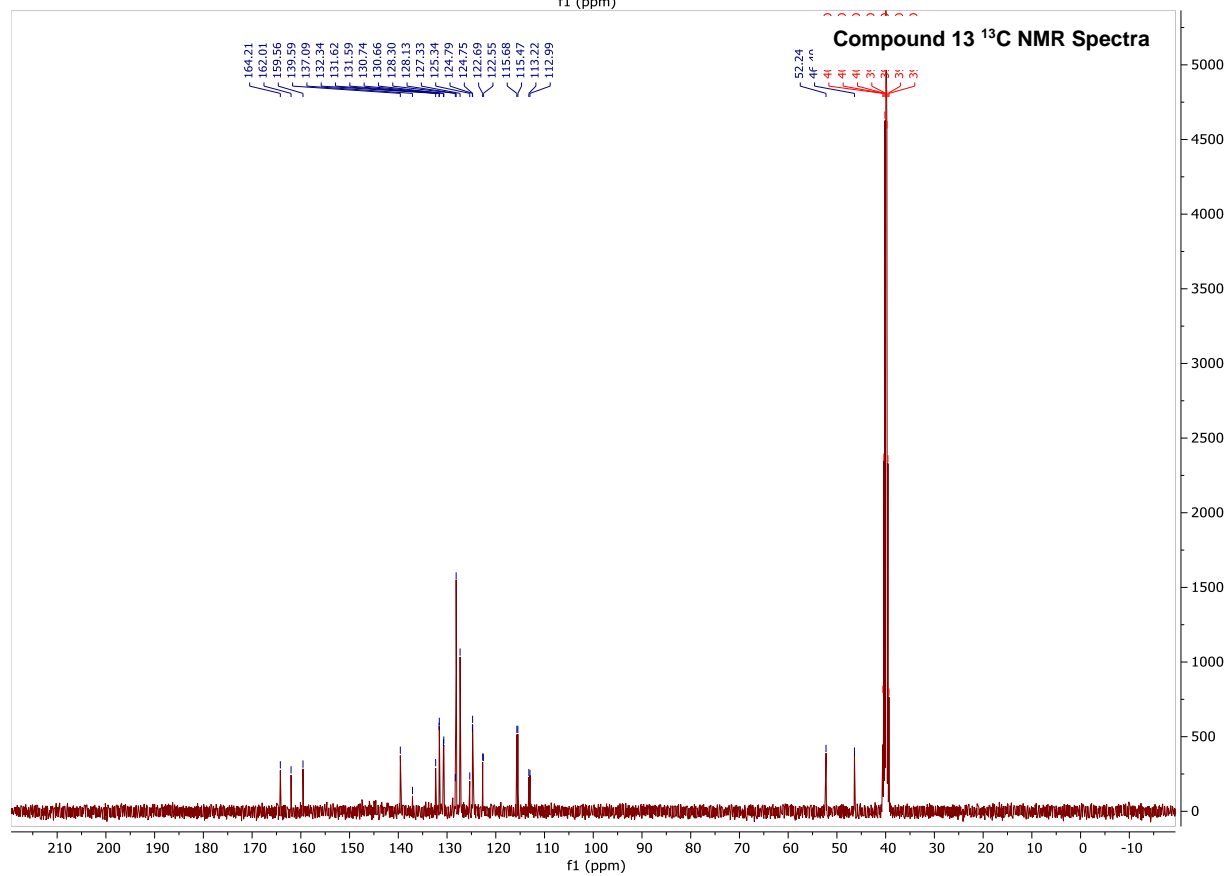

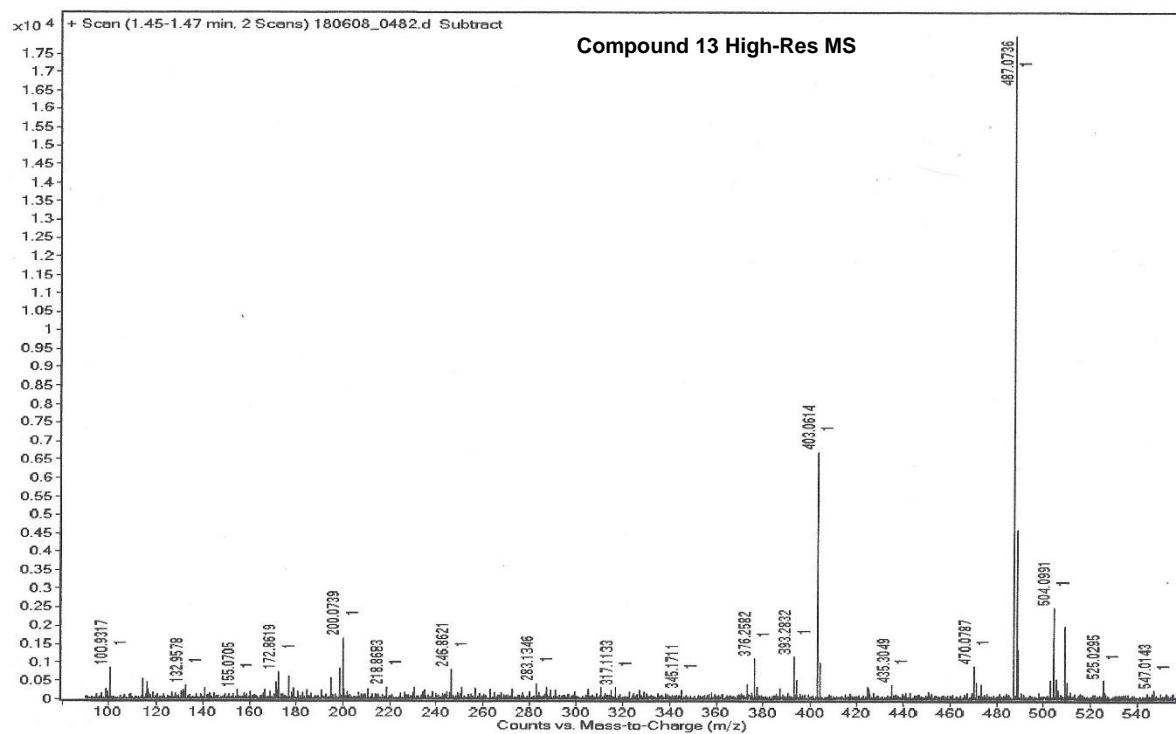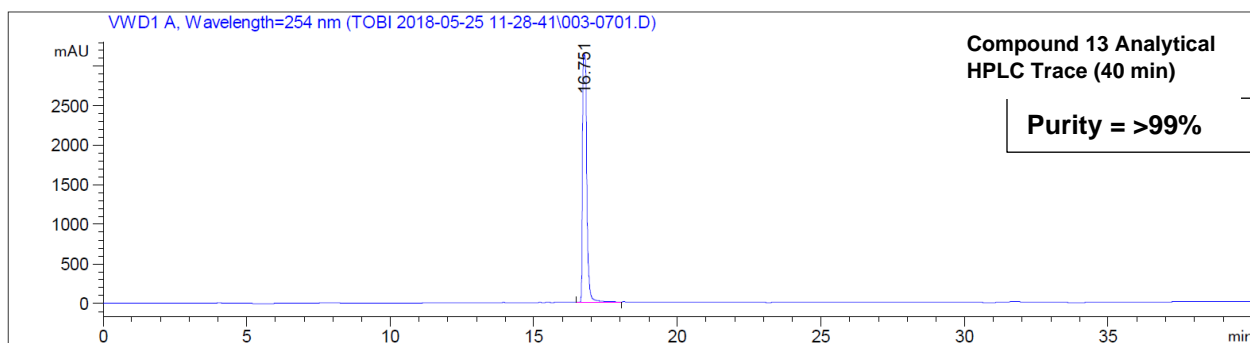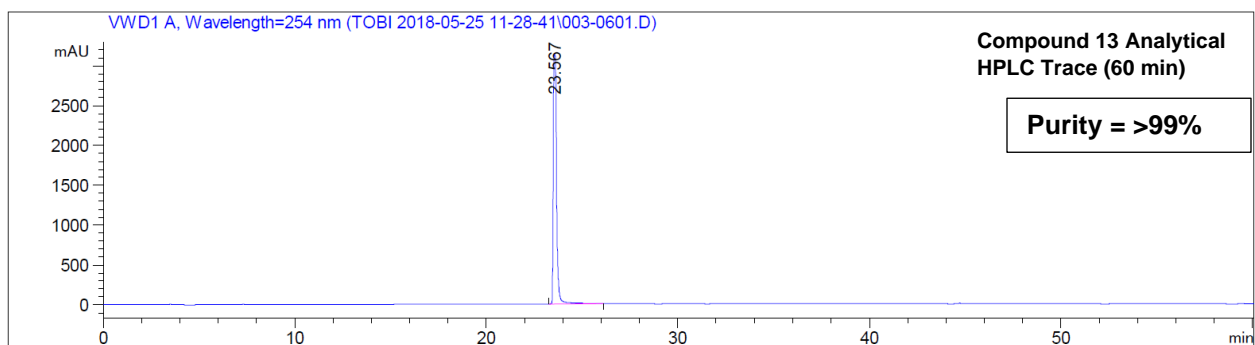

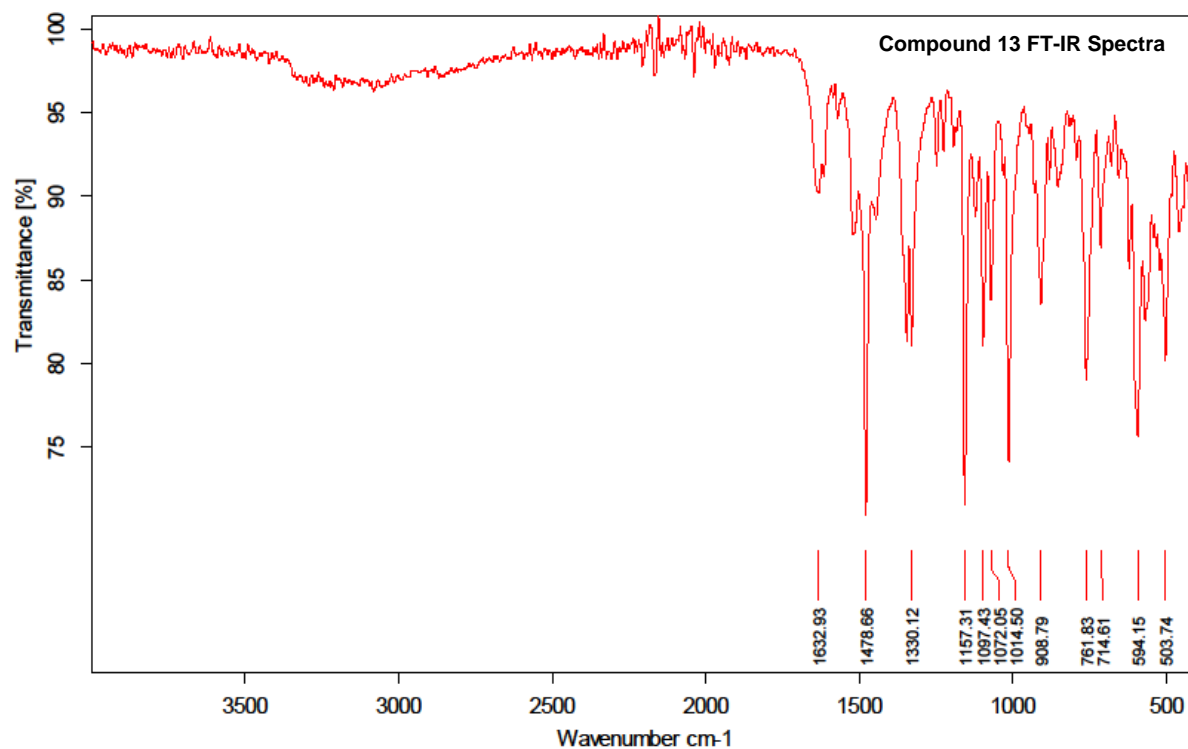

**N-hydroxy-4-(((2,3,4,5-tetrafluoro-N-(pyridin-2-ylmethyl)phenyl)sulfonamido)methyl)benzamide.**  
Yield: 46%

**Compound 14**

$C_{20}H_{15}F_4N_3O_4S$

Mol. Weight: 469.41  $g\cdot mol^{-1}$

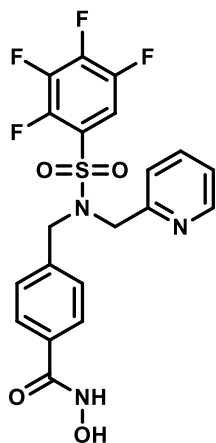

$^1H$  NMR (400 MHz,  $CD_3CN$ )  $\delta$  8.33 (d,  $J$  = 4.6 Hz, 1H), 7.76 – 7.53 (m, 5H), 7.33 (d,  $J$  = 7.7 Hz, 2H), 7.24 – 7.07 (m, 3H), 4.67 (s, 2H), 4.55 (s, 2H).

$^{19}F$  NMR (376 MHz,  $CD_3CN$ )  $\delta$  -134.6 (ddt,  $J$  = 20.6, 13.5, 6.9 Hz), -138.6 – -139.5 (m), -149.7 (ddd,  $J$  = 27.5, 18.8, 8.1 Hz), -154.7 (t,  $J$  = 20.5 Hz).

$^{13}C$  NMR (101 MHz,  $CD_3CN$ )  $\delta$  155.1, 149.1, 139.9, 136.7, 128.5, 127.1, 122.8, 117.3, 112.4, 52.2, 51.6.

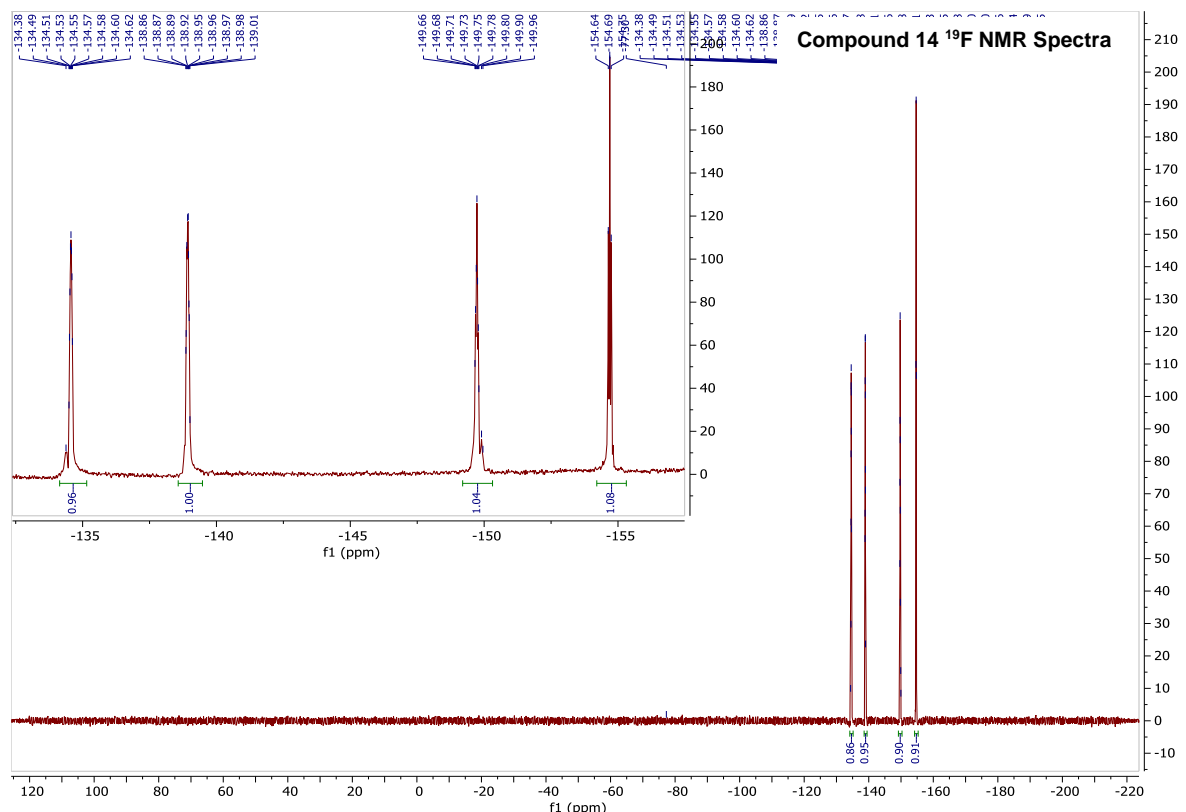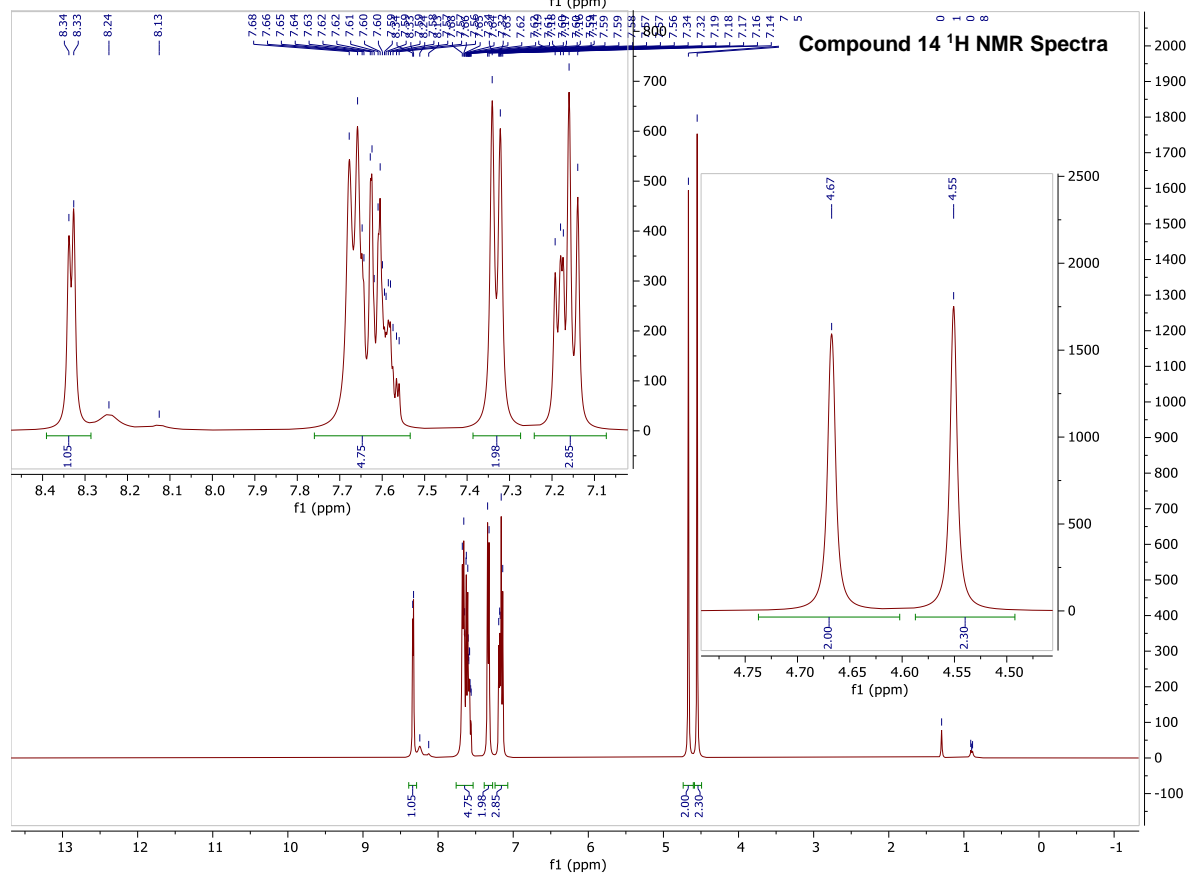



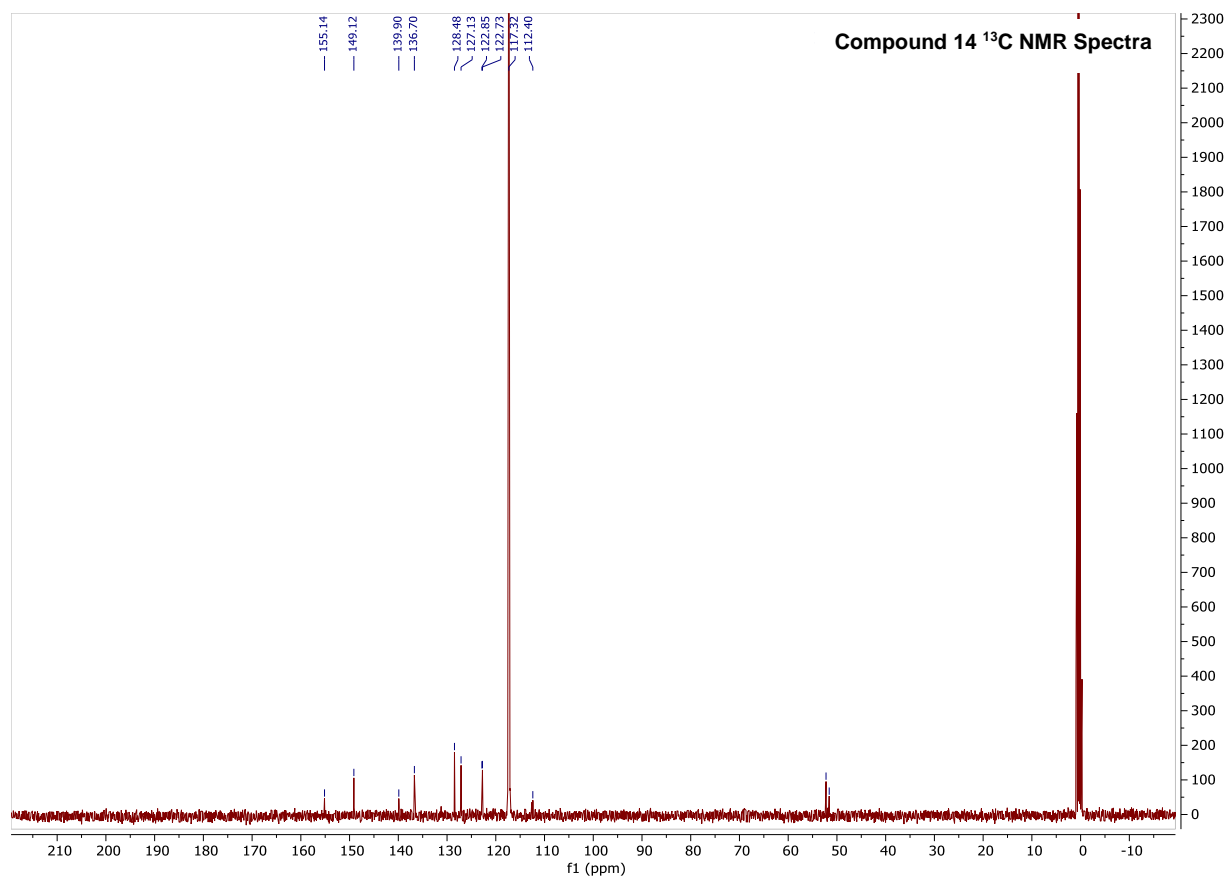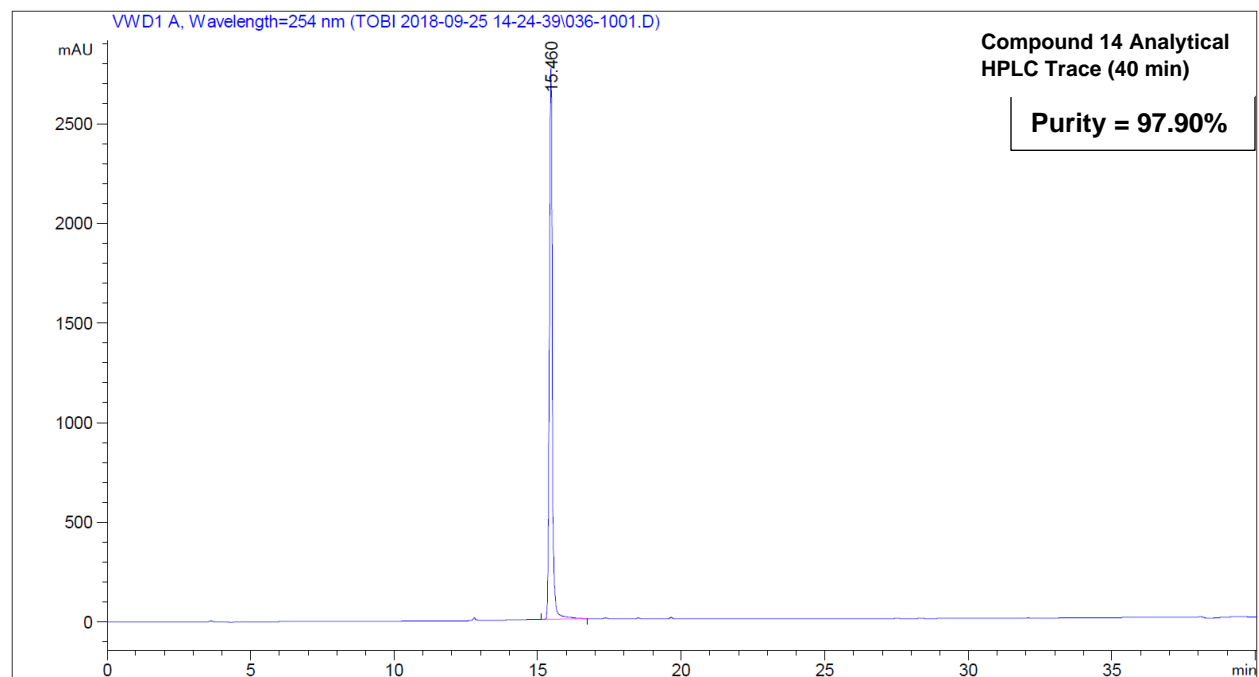

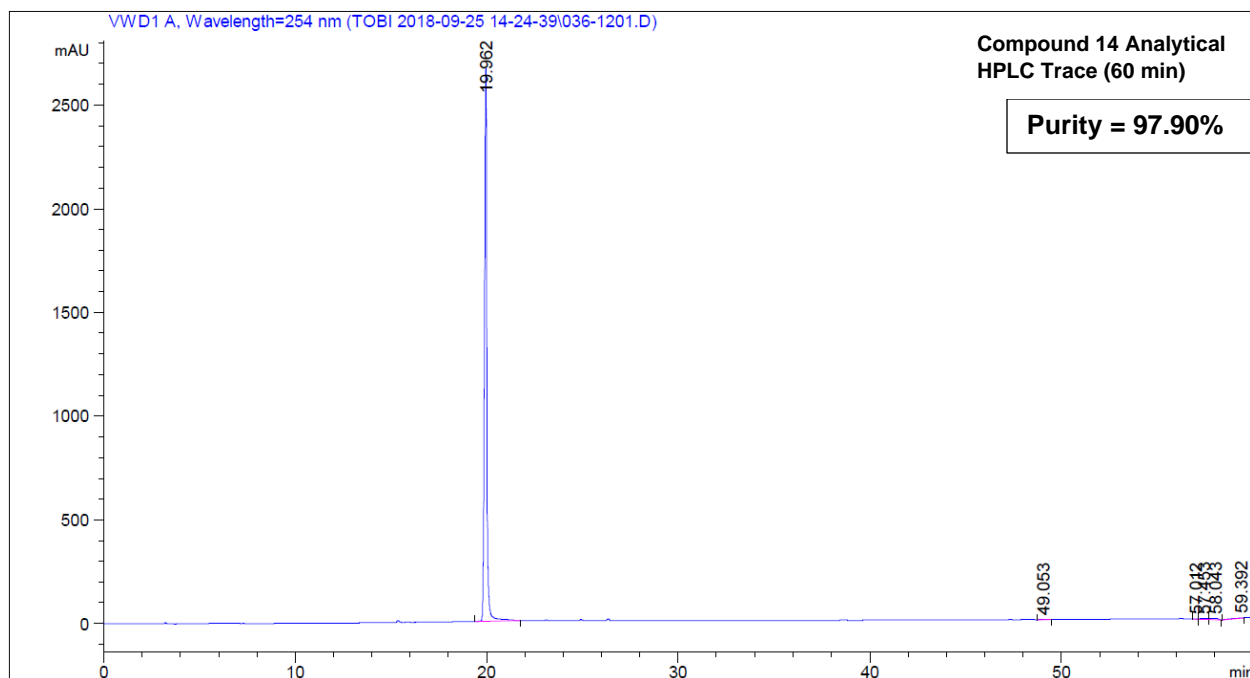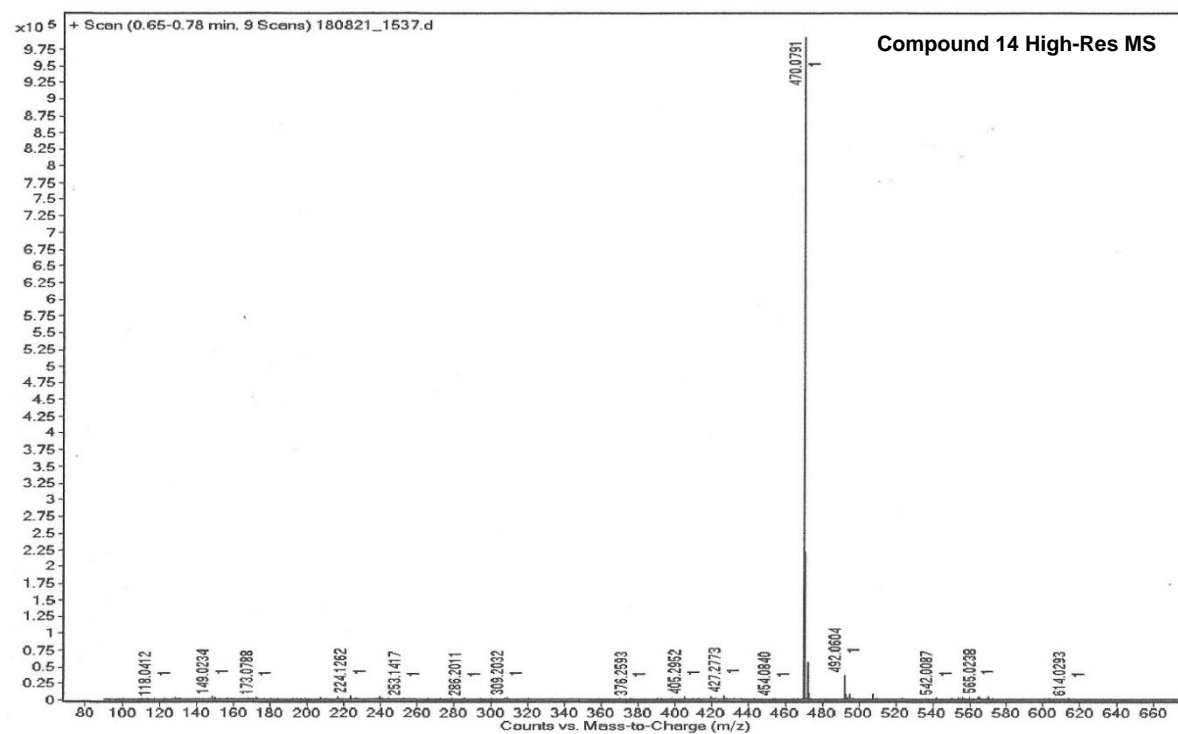

**N-hydroxy-4-(((2,3,4,5-tetrafluoro-N-(pyridin-3-ylmethyl)phenyl)sulfonamido)methyl)benzamide.**  
Yield: 43%

**TO-317**

C<sub>20</sub>H<sub>15</sub>F<sub>4</sub>N<sub>3</sub>O<sub>4</sub>S

Mol. Weight: 469.41 g·mol<sup>-1</sup>

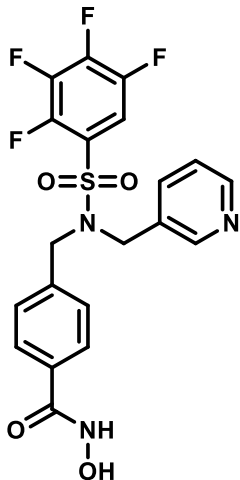

<sup>1</sup>H NMR (400 MHz, DMSO) δ 11.21 (s, 1H), 9.16 (s, 1H), 8.48 – 8.26 (m, 2H), 7.93 – 7.74 (m, 1H), 7.63 (d, *J* = 7.9 Hz, 1H), 7.60 – 7.41 (m, 2H), 7.33 – 7.10 (m, 3H), 4.55 (d, *J* = 11.9 Hz, 4H).

<sup>19</sup>F NMR (376 MHz, DMSO) δ -134.3 (ddt, *J* = 20.7, 13.5, 7.2 Hz), -136.6 (dt, *J* = 21.8, 11.0 Hz), -147.4 (dtdd, *J* = 41.1, 30.5, 18.4, 9.7 Hz), -152.2 (t, *J* = 22.1 Hz).

<sup>13</sup>C NMR (101 MHz, DMSO) δ 164.0, 160.0, 149.9, 147.6, 145.8, 144.6, 143.4, 142.4, 139.9, 138.4, 136.8, 134.56, 132.4, 132.0, 129.0, 127.3, 125.4, 124.5, 123.8, 113.4, 52.5, 50.2

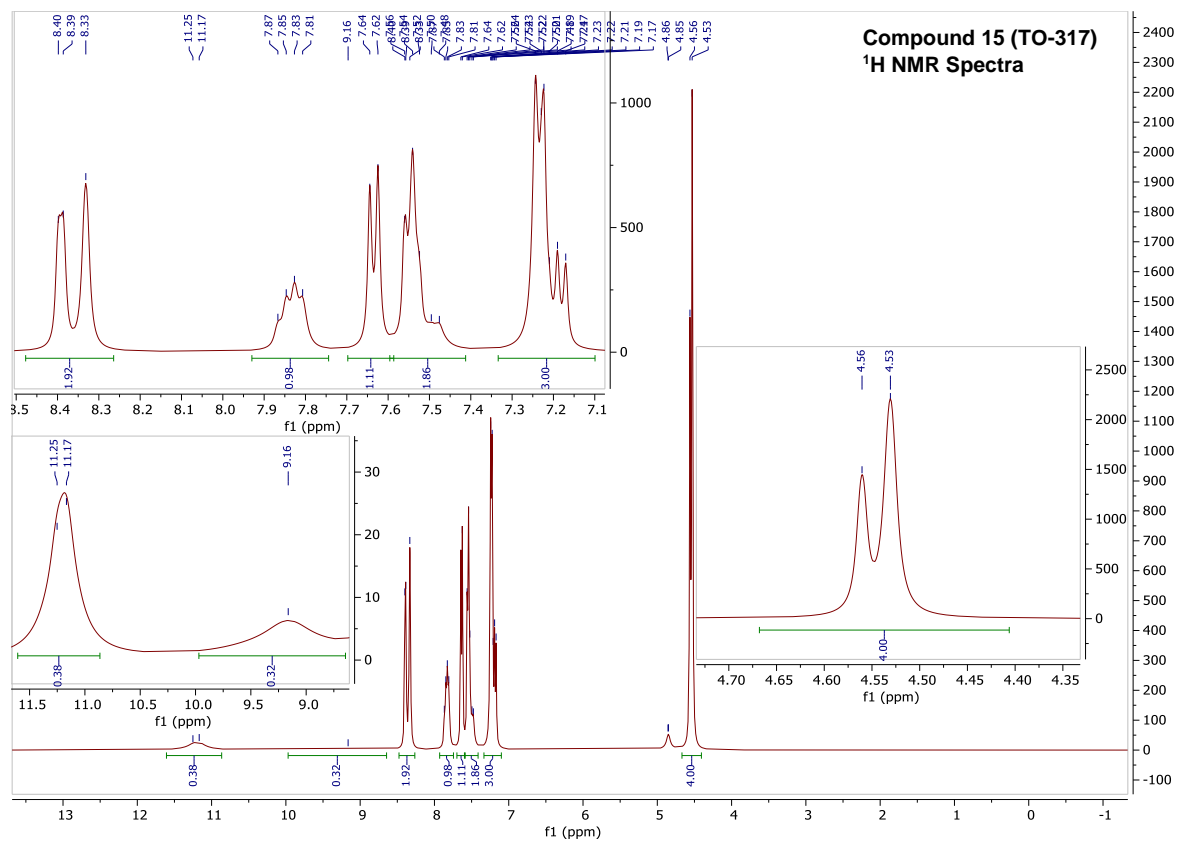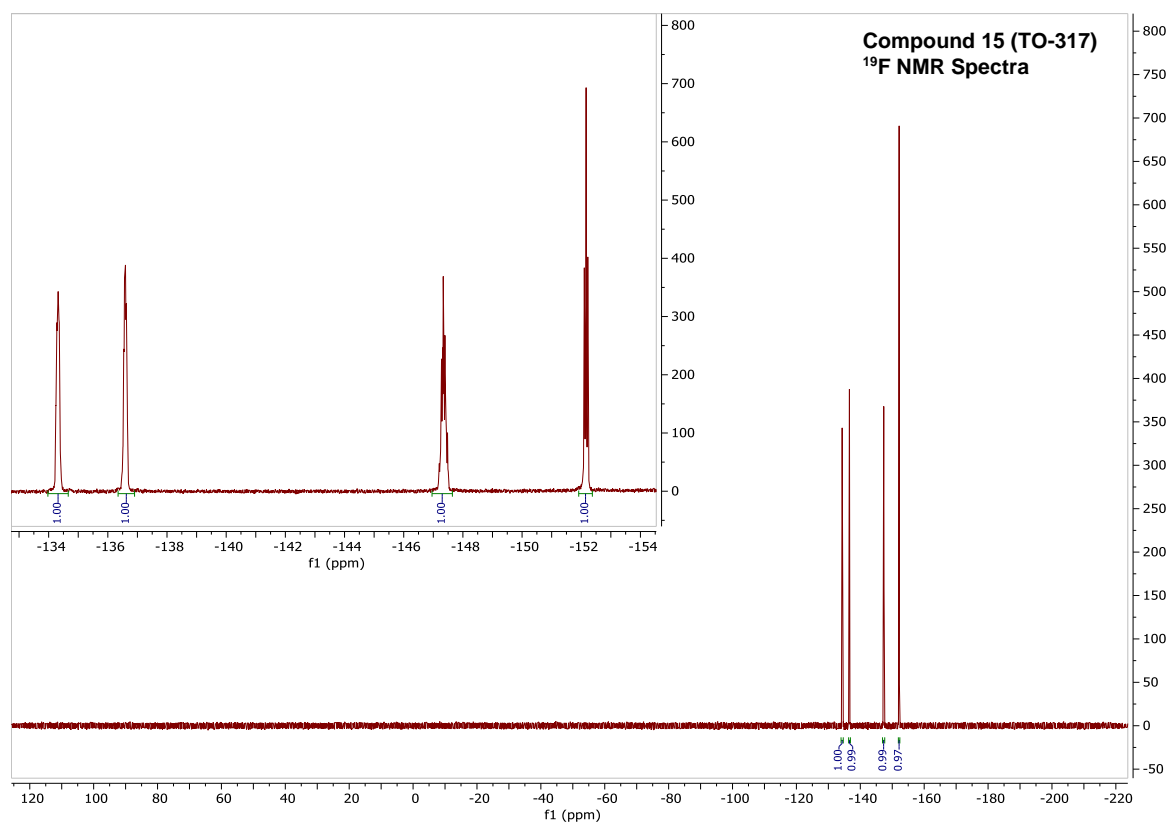

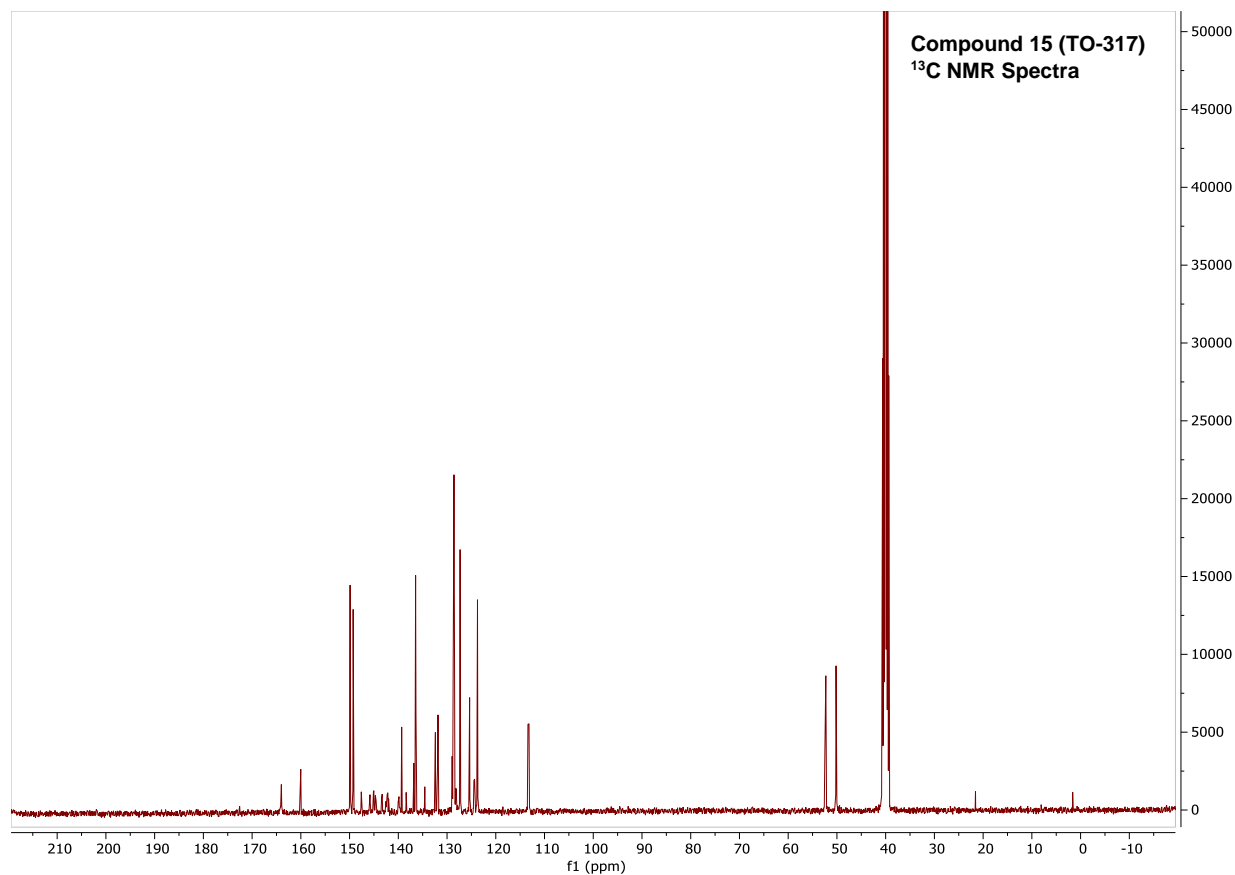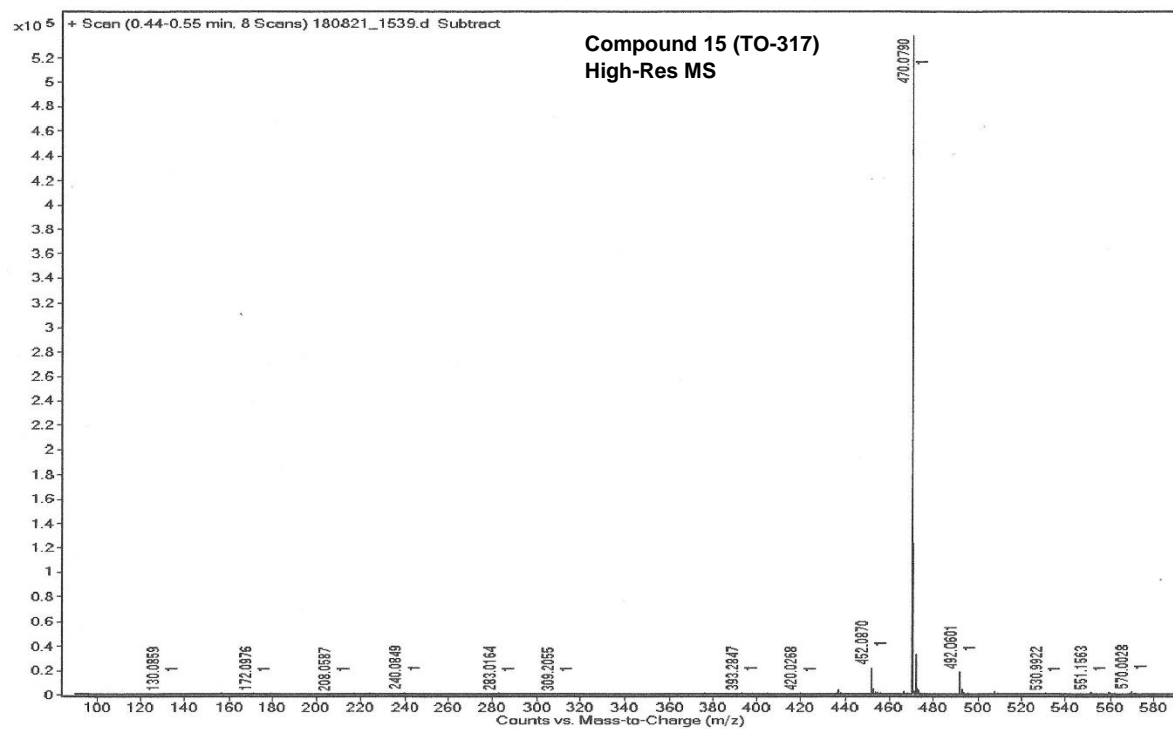

[S81]

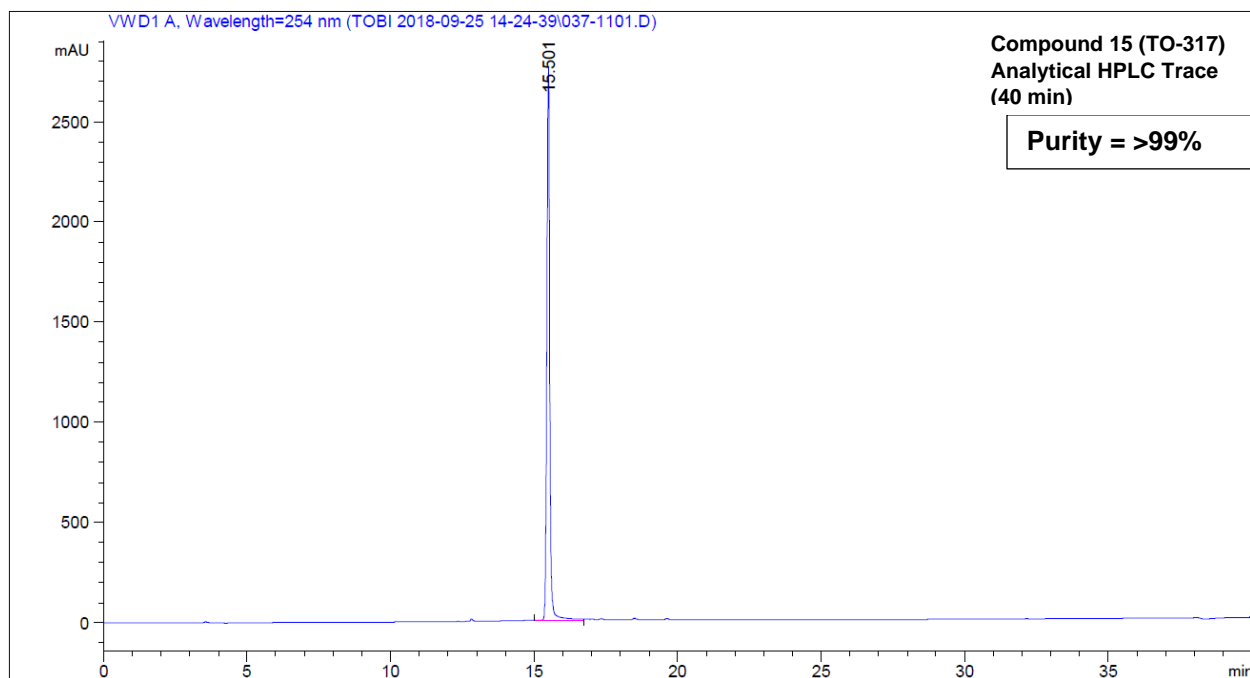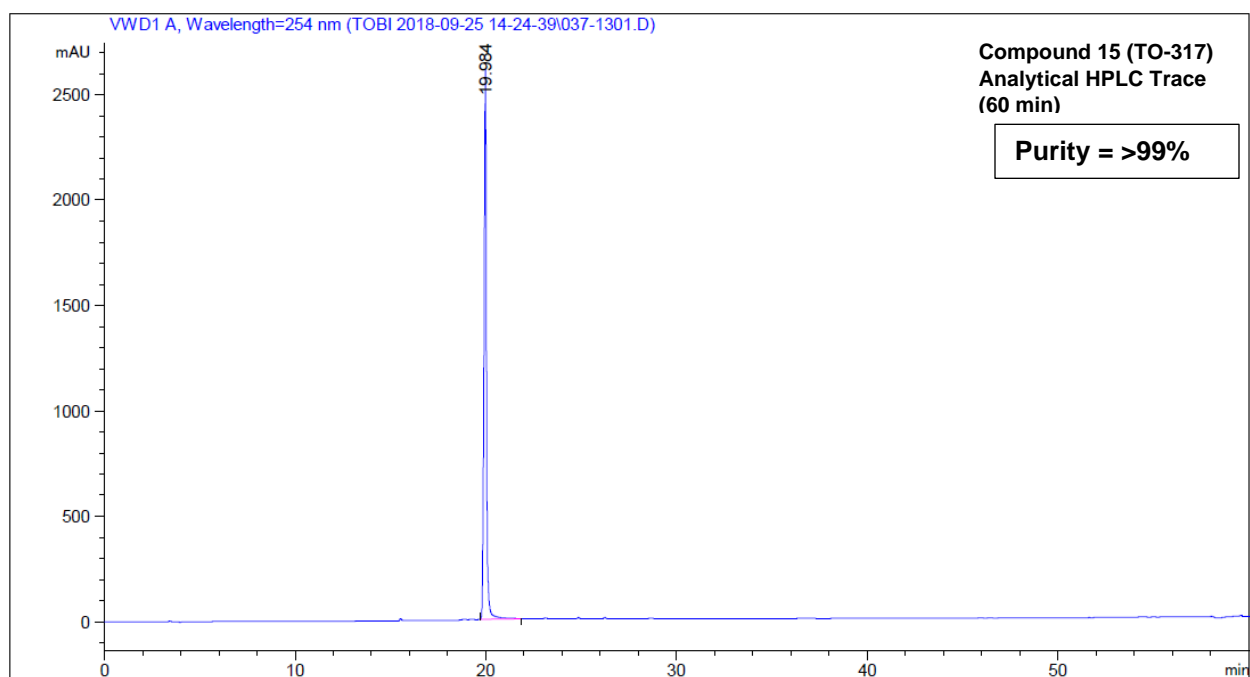

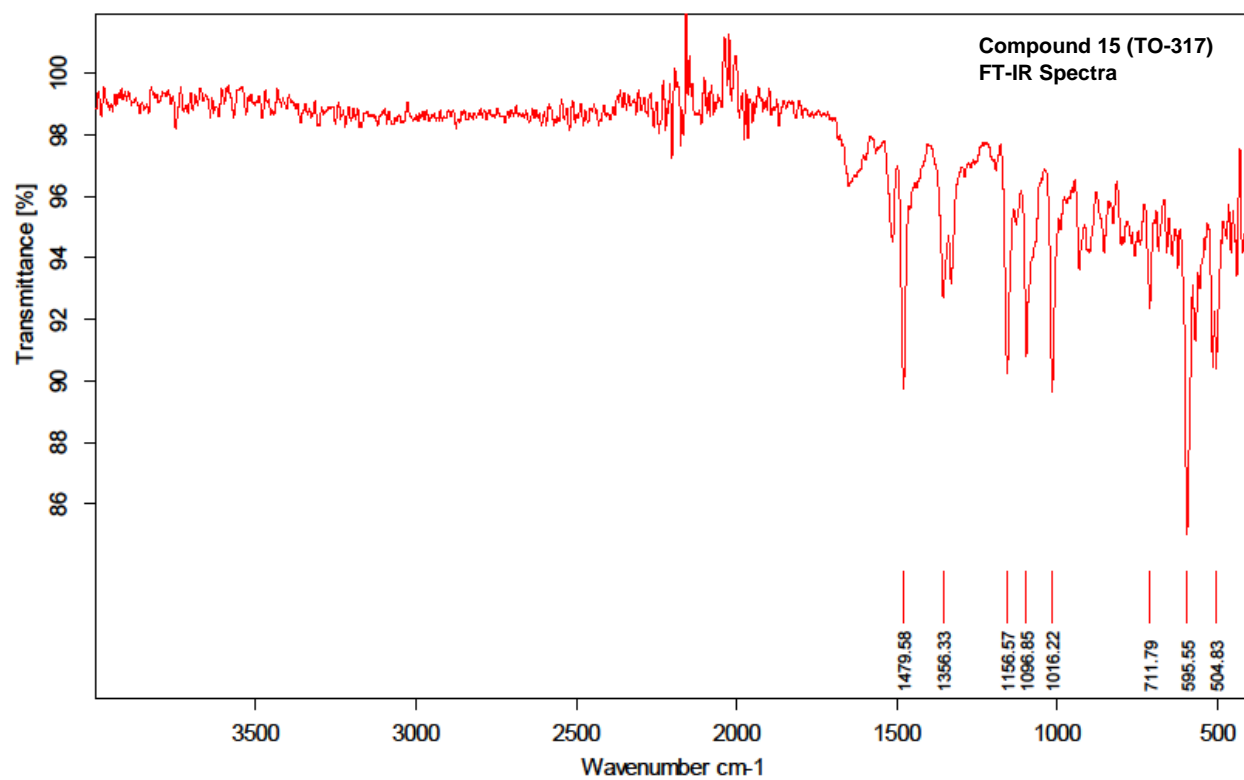

## References

- (1) Friesner, R. A.; Murphy, R. B.; Repasky, M. P.; Frye, L. L.; Greenwood, J. R.; Halgren, T. A.; Sanschagrin, P. C.; Mainz, D. T. Extra Precision Glide: Docking and Scoring Incorporating a Model of Hydrophobic Enclosure for Protein-Ligand Complexes. *J. Med. Chem.* **2006**. <https://doi.org/10.1021/jm051256o>.
- (2) Halgren, T. A.; Murphy, R. B.; Friesner, R. A.; Beard, H. S.; Frye, L. L.; Pollard, W. T.; Banks, J. L. Glide: A New Approach for Rapid, Accurate Docking and Scoring. 2. Enrichment Factors in Database Screening. *J. Med. Chem.* **2004**. <https://doi.org/10.1021/jm030644s>.
- (3) Friesner, R. A.; Banks, J. L.; Murphy, R. B.; Halgren, T. A.; Klicic, J. J.; Mainz, D. T.; Repasky, M. P.; Knoll, E. H.; Shelley, M.; Perry, J. K.; Shaw, D. E.; Francis, P.; Shenkin, P. S. Glide: A New Approach for Rapid, Accurate Docking and Scoring. 1. Method and Assessment of Docking Accuracy. *J. Med. Chem.* **2004**. <https://doi.org/10.1021/jm0306430>.
- (4) Osko, J. D.; Christianson, D. W. Methods for the Expression, Purification, and Crystallization of Histone Deacetylase 6–Inhibitor Complexes. In *Methods in Enzymology*; 2019. <https://doi.org/10.1016/bs.mie.2019.06.028>.
- (5) Battye, T. G. G.; Kontogiannis, L.; Johnson, O.; Powell, H. R.; Leslie, A. G. W. IMOSFLM: A New Graphical Interface for Diffraction-Image Processing with MOSFLM. *Acta Crystallogr. Sect. D Biol. Crystallogr.* **2011**. <https://doi.org/10.1107/S0907444910048675>.
- (6) Evans, P. R.; Murshudov, G. N. How Good Are My Data and What Is the Resolution? *Acta Crystallogr. Sect. D Biol. Crystallogr.* **2013**. <https://doi.org/10.1107/S0907444913000061>.
- (7) Winn, M. D.; Ballard, C. C.; Cowtan, K. D.; Dodson, E. J.; Emsley, P.; Evans, P. R.; Keegan, R. M.; Krissinel, E. B.; Leslie, A. G. W.; McCoy, A.; McNicholas, S. J.; Murshudov, G. N.; Pannu, N. S.; Potterton, E. A.; Powell, H. R.; Read, R. J.; Vagin, A.; Wilson, K. S. Overview of the CCP4 Suite and Current Developments. *Acta Crystallographica Section D: Biological Crystallography*. 2011. <https://doi.org/10.1107/S0907444910045749>.
- (8) McCoy, A. J.; Grosse-Kunstleve, R. W.; Adams, P. D.; Winn, M. D.; Storoni, L. C.; Read, R. J. Phaser Crystallographic Software. *J. Appl. Crystallogr.* **2007**. <https://doi.org/10.1107/S0021889807021206>.



- (9) Hai, Y.; Christianson, D. W. Histone Deacetylase 6 Structure and Molecular Basis of Catalysis and Inhibition. *Nat. Chem. Biol.* **2016**. <https://doi.org/10.1038/nchembio.2134>.
- (10) Adams, P. D.; Afonine, P. V.; Bunkóczi, G.; Chen, V. B.; Davis, I. W.; Echols, N.; Headd, J. J.; Hung, L. W.; Kapral, G. J.; Grosse-Kunstleve, R. W.; McCoy, A. J.; Moriarty, N. W.; Oeffner, R.; Read, R. J.; Richardson, D. C.; Richardson, J. S.; Terwilliger, T. C.; Zwart, P. H. PHENIX: A Comprehensive Python-Based System for Macromolecular Structure Solution. *Acta Crystallogr. Sect. D Biol. Crystallogr.* **2010**. <https://doi.org/10.1107/S0907444909052925>.
- (11) Emsley, P.; Lohkamp, B.; Scott, W. G.; Cowtan, K. Features and Development of Coot. *Acta Crystallogr. Sect. D Biol. Crystallogr.* **2010**. <https://doi.org/10.1107/S0907444910007493>.
- (12) Chen, V. B.; Arendall, W. B.; Headd, J. J.; Keedy, D. A.; Immormino, R. M.; Kapral, G. J.; Murray, L. W.; Richardson, J. S.; Richardson, D. C. MolProbity: All-Atom Structure Validation for Macromolecular Crystallography. *Acta Crystallogr. Sect. D Biol. Crystallogr.* **2010**. <https://doi.org/10.1107/S0907444909042073>.
- (13) Hassan, M. M.; Israelian, J.; Nawar, N.; Ganda, G.; Manaswiyoungkul, P.; Raouf, Y.; Armstrong, D.; Sedighi, A.; Olaoye, O.; Erdogan, F.; Cabral, A.; Angeles, F.; Altintas, R.; de Araujo, E.; Gunning, P. T. Characterization of Conformationally Constrained Benzanilide Scaffolds for Potent and Selective HDAC8 Targeting. *J. Med. Chem.* **2020**, No. 63, 8634–8648. <https://doi.org/10.1021/acs.jmedchem.0c01025>.
